# Supplementary material for: Nutrition, Physical Activity and Smoking Habit in the Italian General Adult Population: CUORE Project Health Examination Survey 2018–2019
Source: MDPI journal article supplement (doi:10.3390/healthcare12040475), 2024-02-15
Supplement: s1 [file s1]

**Table S.1. Age-standardized (Italian population) current smokers and former smokers prevalence and mean of number of cigarettes smoked per day by region.**

**Men and women residing in Italy aged 35-74 years, Health Examination Survey 2018-2019 - CUORE Project.**

|                                    |     | Men  |      |        |      |                           | Women |      |      |        |      |                           |
|------------------------------------|-----|------|------|--------|------|---------------------------|-------|------|------|--------|------|---------------------------|
| Current Smokers                    |     |      |      |        |      |                           |       |      |      |        |      |                           |
|                                    | N   | n    | %    | CI 95% |      | χ <sup>2</sup><br>p-value | N     | n    | %    | CI 95% |      | χ <sup>2</sup><br>p-value |
| Italian Region                     |     |      |      |        |      |                           |       |      |      |        |      |                           |
| Abruzzo                            | 103 | 24   | 24,2 | 7,5    | 40,8 | 0,1115                    | 106   | 24   | 22,6 | 6,6    | 38,6 | 0,8172                    |
| Basilicata                         | 106 | 24   | 22,4 | 6,4    | 38,5 |                           | 113   | 16   | 14,2 | 1,3    | 27,1 |                           |
| Calabria                           | 102 | 18   | 17,8 | 2,9    | 32,8 |                           | 108   | 11   | 10,8 | 0,0    | 22,5 |                           |
| Emilia-Romagna                     | 103 | 22   | 21,2 | 5,4    | 37,0 |                           | 105   | 19   | 18,0 | 3,2    | 32,9 |                           |
| Lazio                              | 99  | 30   | 31,2 | 12,9   | 49,4 |                           | 114   | 24   | 21,3 | 6,1    | 36,5 |                           |
| Liguria                            | 104 | 20   | 19,0 | 3,8    | 34,1 |                           | 107   | 18   | 17,0 | 2,8    | 31,3 |                           |
| Lombardia                          | 98  | 22   | 23,7 | 6,7    | 40,6 |                           | 99    | 18   | 18,1 | 2,7    | 33,4 |                           |
| Piemonte                           | 104 | 24   | 22,5 | 6,3    | 38,7 |                           | 110   | 19   | 16,9 | 2,9    | 31,0 |                           |
| Sicilia                            | 105 | 22   | 21,9 | 5,9    | 37,9 |                           | 103   | 31   | 30,4 | 12,5   | 48,3 |                           |
| Toscana                            | 107 | 28   | 27,7 | 10,7   | 44,7 |                           | 94    | 16   | 17,3 | 2,0    | 32,6 |                           |
| Daily smoke - number of cigarettes |     |      |      |        |      |                           |       |      |      |        |      |                           |
|                                    | N   | Mean | SD   | CI 95% |      | anova<br>p-value          | N     | Mean | SD   | CI 95% |      | anova<br>p-value          |
| Italian Region                     |     |      |      |        |      |                           |       |      |      |        |      |                           |
| Abruzzo                            | 24  | 11,0 | 8,2  | 9,4    | 12,5 | 0,0090                    | 24    | 9,6  | 4,9  | 8,7    | 10,6 | 0,0090                    |
| Basilicata                         | 24  | 13,9 | 9,8  | 12,1   | 15,8 |                           | 16    | 10,0 | 5,2  | 9,0    | 11,0 |                           |
| Calabria                           | 18  | 17,4 | 8,4  | 15,8   | 19,1 |                           | 11    | 8,9  | 6,0  | 7,8    | 10,1 |                           |
| Emilia-Romagna                     | 22  | 14,7 | 11,6 | 12,5   | 17,0 |                           | 19    | 15,1 | 9,6  | 13,3   | 17,0 |                           |
| Lazio                              | 30  | 14,6 | 8,2  | 13,0   | 16,2 |                           | 24    | 10,6 | 5,9  | 9,5    | 11,7 |                           |
| Liguria                            | 20  | 12,1 | 7,2  | 10,7   | 13,5 |                           | 18    | 10,1 | 7,4  | 8,7    | 11,5 |                           |
| Lombardia                          | 22  | 14,7 | 10,3 | 12,7   | 16,7 |                           | 18    | 8,5  | 5,4  | 7,4    | 9,5  |                           |
| Piemonte                           | 24  | 9,7  | 9,2  | 7,9    | 11,5 |                           | 19    | 9,0  | 6,8  | 7,7    | 10,2 |                           |
| Sicilia                            | 22  | 18,1 | 5,8  | 17,0   | 19,2 |                           | 31    | 12,8 | 5,3  | 11,8   | 13,8 |                           |
| Toscana                            | 28  | 9,7  | 6,0  | 8,6    | 10,9 |                           | 16    | 11,0 | 5,4  | 9,9    | 12,1 |                           |
| Former Smokers                     |     |      |      |        |      |                           |       |      |      |        |      |                           |
|                                    | N   | n    | %    | CI 95% |      | χ <sup>2</sup><br>p-value | N     | n    | %    | CI 95% |      | χ <sup>2</sup><br>p-value |
| Italian Region                     |     |      |      |        |      |                           |       |      |      |        |      |                           |
| Abruzzo                            | 103 | 37   | 44,8 | 25,4   | 64,1 | 0,1116                    | 106   | 25   | 29,7 | 12,2   | 47,2 | 0,0158                    |
| Basilicata                         | 106 | 43   | 50,3 | 31,0   | 69,6 |                           | 113   | 24   | 24,2 | 8,3    | 40,0 |                           |
| Calabria                           | 102 | 33   | 37,8 | 18,9   | 56,7 |                           | 108   | 16   | 16,5 | 2,5    | 30,5 |                           |
| Emilia-Romagna                     | 103 | 39   | 47,7 | 28,4   | 67,1 |                           | 105   | 31   | 36,5 | 17,9   | 55,2 |                           |
| Lazio                              | 99  | 30   | 42,9 | 23,3   | 62,5 |                           | 114   | 28   | 30,3 | 13,2   | 47,4 |                           |
| Liguria                            | 104 | 28   | 33,2 | 15,0   | 51,4 |                           | 107   | 21   | 23,5 | 7,4    | 39,5 |                           |
| Lombardia                          | 98  | 30   | 37,8 | 18,4   | 57,1 |                           | 99    | 20   | 23,4 | 6,5    | 40,3 |                           |
| Piemonte                           | 104 | 33   | 40,9 | 21,8   | 59,9 |                           | 110   | 33   | 35,0 | 17,1   | 52,9 |                           |
| Sicilia                            | 105 | 47   | 54,4 | 35,1   | 73,7 |                           | 103   | 17   | 22,5 | 6,2    | 38,7 |                           |
| Toscana                            | 107 | 31   | 39,1 | 20,5   | 57,7 |                           | 94    | 31   | 38,1 | 18,4   | 57,7 |                           |

N: number of participants denominator.

n: number of participants related to the prevalence numerator.

Current smoker is defined as a person who smokes one or more cigarettes per day.

A former smoker is defined as a person who has quit smoking for at least 12 months.

Number of cigarettes refers to packaged, handmade or electronic cigarettes.

SD: standard deviation; CI: confidence interval.

Means, standard deviations, and prevalence were age standardized by Italian National Institute of Statistics-ISTAT Italian population 2019 (except when they are reported by age-classes).

Anova to compare mean values among classes; chi-square test to compare prevalence among classes.

**Table S.2. Age-standardized (Italian population) sedentariness during leisure time and at work prevalence by region. Men and women residing in Italy aged 35-74 years, Health Examination Survey 2018-2019 - CUORE Project.**

|                                               |     | Men |      |        |      |                     | Women |    |      |        |      |                     |
|-----------------------------------------------|-----|-----|------|--------|------|---------------------|-------|----|------|--------|------|---------------------|
| Sedentariness during leisure time             |     |     |      |        |      |                     |       |    |      |        |      |                     |
|                                               | N   | n   | %    | CI 95% |      | $\chi^2$<br>p-value | N     | n  | %    | CI 95% |      | $\chi^2$<br>p-value |
| Italian Region                                |     |     |      |        |      |                     |       |    |      |        |      |                     |
| Abruzzo                                       | 105 | 32  | 30,9 | 13,1   | 48,7 | 0,1783              | 106   | 52 | 49,2 | 30,1   | 68,3 | <0.0001             |
| Basilicata                                    | 106 | 29  | 29,4 | 11,8   | 47,0 |                     | 114   | 56 | 49,8 | 31,5   | 68,2 |                     |
| Calabria                                      | 102 | 48  | 49,0 | 29,6   | 68,5 |                     | 109   | 52 | 48,1 | 29,4   | 66,8 |                     |
| Emilia-Romagna                                | 104 | 47  | 46,6 | 27,5   | 65,8 |                     | 106   | 47 | 44,6 | 25,5   | 63,7 |                     |
| Lazio                                         | 99  | 33  | 35,0 | 16,1   | 53,8 |                     | 115   | 55 | 48,1 | 29,6   | 66,5 |                     |
| Liguria                                       | 104 | 28  | 27,2 | 10,1   | 44,4 |                     | 107   | 33 | 31,6 | 14,0   | 49,3 |                     |
| Lombardia                                     | 98  | 27  | 28,5 | 10,5   | 46,5 |                     | 100   | 42 | 42,6 | 23,0   | 62,2 |                     |
| Piemonte                                      | 104 | 22  | 21,5 | 5,6    | 37,4 |                     | 113   | 33 | 30,1 | 13,1   | 47,0 |                     |
| Sicilia                                       | 105 | 40  | 39,7 | 20,7   | 58,6 |                     | 103   | 68 | 65,8 | 47,4   | 84,3 |                     |
| Toscana                                       | 108 | 29  | 27,1 | 10,2   | 43,9 |                     | 98    | 36 | 36,8 | 17,7   | 55,9 |                     |
| Sedentariness at work                         |     |     |      |        |      |                     |       |    |      |        |      |                     |
|                                               | N   | n   | %    | CI 95% |      | $\chi^2$<br>p-value | N     | n  | %    | CI 95% |      | $\chi^2$<br>p-value |
| Italian Region                                |     |     |      |        |      |                     |       |    |      |        |      |                     |
| Abruzzo                                       | 82  | 33  | 44,2 | 23,0   | 65,4 | 0,0023              | 85    | 31 | 42,6 | 21,7   | 63,4 | 0,0595              |
| Basilicata                                    | 76  | 36  | 50,0 | 27,9   | 72,0 |                     | 87    | 30 | 45,7 | 25,1   | 66,4 |                     |
| Calabria                                      | 71  | 27  | 41,7 | 19,2   | 64,2 |                     | 93    | 14 | 29,4 | 11,1   | 47,8 |                     |
| Emilia-Romagna                                | 79  | 27  | 35,0 | 14,5   | 55,4 |                     | 75    | 23 | 38,0 | 16,1   | 59,9 |                     |
| Lazio                                         | 76  | 35  | 47,6 | 25,7   | 69,6 |                     | 88    | 29 | 47,2 | 26,4   | 68,1 |                     |
| Liguria                                       | 83  | 39  | 48,4 | 27,2   | 69,6 |                     | 81    | 32 | 50,4 | 28,9   | 71,9 |                     |
| Lombardia                                     | 68  | 19  | 29,1 | 8,0    | 50,1 |                     | 71    | 25 | 49,6 | 26,4   | 72,8 |                     |
| Piemonte                                      | 85  | 55  | 64,3 | 44,1   | 84,5 |                     | 87    | 48 | 61,6 | 41,5   | 81,8 |                     |
| Sicilia                                       | 64  | 23  | 38,1 | 14,8   | 61,5 |                     | 88    | 21 | 41,6 | 20,9   | 62,3 |                     |
| Toscana                                       | 83  | 38  | 47,7 | 26,6   | 68,9 |                     | 78    | 37 | 53,6 | 31,8   | 75,4 |                     |
| Sedentariness during leisure time and at work |     |     |      |        |      |                     |       |    |      |        |      |                     |
|                                               | N   | n   | %    | CI 95% |      | $\chi^2$<br>p-value | N     | n  | %    | CI 95% |      | $\chi^2$<br>p-value |
| Italian Region                                |     |     |      |        |      |                     |       |    |      |        |      |                     |
| Abruzzo                                       | 78  | 8   | 10,8 | 0,0    | 24,1 | 0,2512              | 77    | 16 | 20,3 | 3,3    | 37,2 | 0,8029              |
| Basilicata                                    | 74  | 11  | 15,2 | 0,0    | 31,1 |                     | 77    | 15 | 19,9 | 3,4    | 36,4 |                     |
| Calabria                                      | 70  | 18  | 26,6 | 6,4    | 46,8 |                     | 73    | 11 | 15,0 | 0,7    | 29,3 |                     |
| Emilia-Romagna                                | 78  | 12  | 15,9 | 0,0    | 31,6 |                     | 66    | 10 | 15,6 | 0,0    | 31,9 |                     |
| Lazio                                         | 74  | 14  | 19,4 | 2,0    | 36,7 |                     | 76    | 11 | 14,8 | 0,0    | 29,6 |                     |
| Liguria                                       | 82  | 10  | 12,2 | 0,0    | 26,0 |                     | 77    | 10 | 12,8 | 0,0    | 27,2 |                     |
| Lombardia                                     | 67  | 7   | 10,3 | 0,0    | 24,5 |                     | 68    | 13 | 19,8 | 1,4    | 38,3 |                     |
| Piemonte                                      | 85  | 12  | 14,9 | 0,0    | 29,9 |                     | 85    | 16 | 19,9 | 3,4    | 36,4 |                     |
| Sicilia                                       | 63  | 12  | 19,6 | 0,5    | 38,6 |                     | 60    | 12 | 19,8 | 3,1    | 36,5 |                     |
| Toscana                                       | 81  | 10  | 12,2 | 0,0    | 26,1 |                     | 75    | 18 | 23,7 | 5,1    | 42,3 |                     |

N: number of participants denominator.

n: number of participants related to the prevalence numerator.

Sedentariness during leisure time is defined as someone who usually carries out activities such as reading, watching television, getting to the movies or spend leisure time in other sedentary activities.

Sedentariness at work is defined as one whose work mainly involves sitting at a desk and generally without the need to walk.

SD: standard deviation; CI: confidence interval.

Prevalence was age standardized by Italian National Institute of Statistics-ISTAT Italian population 2019 (except when it is reported by age-classes).

Chi-square test to compare prevalence among classes.

**Table S.3. Age-standardized (Italian population) sedentary retirees prevalence by sex, age classes, geographical area and educational level.**

**Men and women residing in Italy aged 35-74 years, Health Examination Survey 2018-2019 - CUORE Project.**

|                                                    | Men |     |      |        |      |                           | Women |     |      |        |      |                           |
|----------------------------------------------------|-----|-----|------|--------|------|---------------------------|-------|-----|------|--------|------|---------------------------|
| % Sedentariness during leisure time among retirees |     |     |      |        |      |                           |       |     |      |        |      |                           |
|                                                    | N   | n   | %    | CI 95% |      | χ <sup>2</sup><br>p-value | N     | n   | %    | CI 95% |      | χ <sup>2</sup><br>p-value |
| All                                                | 268 | 101 | 37,8 | 31,9   | 43,7 |                           | 238   | 125 | 51,9 | 45,9   | 57,9 |                           |
| Age classes (years)                                |     |     |      |        |      |                           |       |     |      |        |      |                           |
| 35-44                                              | 9   | 6   | 66,7 | 35,9   | 97,5 | 0,2658                    | 7     | 1   | 14,3 | 0,0    | 40,2 | 0,0506                    |
| 45-54                                              | 5   | 1   | 20,0 | 0,0    | 55,1 |                           | 7     | 2   | 28,6 | 0,0    | 62,0 |                           |
| 55-64                                              | 50  | 19  | 38,0 | 24,6   | 51,5 |                           | 38    | 17  | 44,7 | 28,9   | 60,6 |                           |
| 65-74                                              | 204 | 75  | 36,8 | 30,2   | 43,4 |                           | 186   | 105 | 56,5 | 49,3   | 63,6 |                           |
| Italian Area                                       |     |     |      |        |      |                           |       |     |      |        |      |                           |
| North                                              | 95  | 36  | 38,6 | 29,2   | 48,1 | 0,2198                    | 112   | 57  | 50,2 | 40,6   | 59,7 | 0,7872                    |
| Center                                             | 48  | 23  | 48,5 | 34,8   | 62,3 |                           | 47    | 24  | 50,9 | 37,3   | 64,5 |                           |
| South                                              | 125 | 42  | 33,2 | 24,1   | 42,3 |                           | 79    | 44  | 54,9 | 45,5   | 64,3 |                           |
| Italian Region                                     |     |     |      |        |      |                           |       |     |      |        |      |                           |
| Abruzzo                                            | 23  | 8   | 35,7 | 16,9   | 54,5 | 0,2658                    | 21    | 13  | 60,9 | 41,9   | 79,9 | 0,0506                    |
| Basilicata                                         | 30  | 13  | 43,1 | 23,8   | 62,5 |                           | 27    | 16  | 58,6 | 40,2   | 77,0 |                           |
| Calabria                                           | 31  | 10  | 31,2 | 12,9   | 49,5 |                           | 16    | 8   | 50,6 | 31,4   | 69,9 |                           |
| Emilia-Romagna                                     | 25  | 9   | 37,6 | 18,7   | 56,5 |                           | 31    | 11  | 35,4 | 16,8   | 54,0 |                           |
| Lazio                                              | 23  | 11  | 48,4 | 28,4   | 68,5 |                           | 27    | 12  | 45,2 | 26,5   | 63,8 |                           |
| Liguria                                            | 21  | 9   | 43,9 | 24,3   | 63,4 |                           | 26    | 9   | 34,7 | 16,3   | 53,0 |                           |
| Lombardia                                          | 30  | 7   | 22,2 | 5,4    | 39,0 |                           | 29    | 18  | 60,3 | 40,6   | 79,9 |                           |
| Piemonte                                           | 19  | 11  | 60,1 | 40,7   | 79,5 |                           | 26    | 19  | 72,7 | 56,0   | 89,4 |                           |
| Sicilia                                            | 25  | 12  | 48,6 | 29,4   | 67,9 |                           | 20    | 12  | 58,6 | 38,7   | 78,5 |                           |
| Toscana                                            | 41  | 11  | 26,5 | 9,3    | 43,7 |                           | 15    | 7   | 44,6 | 24,7   | 64,5 |                           |
| Education                                          |     |     |      |        |      |                           |       |     |      |        |      |                           |
| Primary and middle school                          | 129 | 28  | 21,6 | 12,1   | 31,1 | <0,0001                   | 110   | 34  | 30,9 | 20,8   | 40,9 | <0,0001                   |
| High school and university                         | 139 | 73  | 52,7 | 45,5   | 60,0 |                           | 128   | 91  | 69,6 | 62,9   | 76,2 |                           |

N: number of participants denominator.

n: number of participants related to the prevalence numerator.

Retired: participants who no longer carries out a work activity.

SD: standard deviation; CI: confidence interval.

Prevalence was age standardized by Italian National Institute of Statistics-ISTAT Italian population 2019 (except when it is reported by age-classes).

Chi-square test to compare prevalence among classes.

**Table S.4. Age-standardized (Italian population) balanced nutrition food groups intake (EPIC questionnaire): vegetables, fruit, fish and cheese prevalence by region.**

**Men and women residing in Italy aged 35-74 years, Health Examination Survey 2018-2019 - CUORE Project.**

|                     |  | Men |    |      |       |                     | Women   |     |    |       |                     |      |         |
|---------------------|--|-----|----|------|-------|---------------------|---------|-----|----|-------|---------------------|------|---------|
| Vegetables          |  |     |    |      |       |                     |         |     |    |       |                     |      |         |
|                     |  | N   | n  | %    | CI95% | $\chi^2$<br>p-value | N       | n   | %  | CI95% | $\chi^2$<br>p-value |      |         |
| Italian Region      |  |     |    |      |       |                     |         |     |    |       |                     |      |         |
| Basilicata          |  | 88  | 25 | 28,8 | 9,8   | 47,8                | 0,2081  | 95  | 36 | 37,4  | 18,0                | 56,8 | 0,6029  |
| Calabria            |  | 75  | 24 | 31,8 | 10,9  | 52,7                |         | 67  | 24 | 35,6  | 13,0                | 58,1 |         |
| Emilia-Romagna      |  | 86  | 21 | 24,3 | 6,4   | 42,3                |         | 81  | 32 | 40,5  | 19,0                | 61,9 |         |
| Lazio               |  | 82  | 28 | 33,5 | 12,9  | 54,2                |         | 102 | 40 | 40,0  | 20,8                | 59,2 |         |
| Liguria             |  | 98  | 26 | 27,5 | 9,8   | 45,3                |         | 100 | 42 | 42,3  | 23,0                | 61,6 |         |
| Lombardia           |  | 80  | 18 | 22,4 | 4,0   | 40,7                |         | 81  | 27 | 33,5  | 12,8                | 54,2 |         |
| Piemonte            |  | 93  | 32 | 34,3 | 14,9  | 53,7                |         | 97  | 39 | 40,6  | 21,0                | 60,1 |         |
| Sicilia             |  | 93  | 17 | 19,0 | 3,0   | 35,1                |         | 80  | 24 | 30,0  | 9,8                 | 50,1 |         |
| Toscana             |  | 98  | 31 | 32,5 | 13,9  | 51,0                |         | 82  | 38 | 47,1  | 25,6                | 68,6 |         |
| Fruit               |  |     |    |      |       |                     |         |     |    |       |                     |      |         |
|                     |  | N   | n  | %    | CI95% | $\chi^2$<br>p-value | N       | n   | %  | CI95% | $\chi^2$<br>p-value |      |         |
| Italian Region      |  |     |    |      |       |                     |         |     |    |       |                     |      |         |
| Basilicata          |  | 88  | 42 | 49,0 | 28,0  | 70,0                | 0,0745  | 95  | 51 | 52,8  | 32,7                | 72,8 | 0,5315  |
| Calabria            |  | 75  | 25 | 33,7 | 12,5  | 54,9                |         | 67  | 28 | 41,5  | 18,3                | 64,7 |         |
| Emilia-Romagna      |  | 86  | 38 | 43,6 | 22,9  | 64,4                |         | 81  | 50 | 62,3  | 41,1                | 83,5 |         |
| Lazio               |  | 82  | 45 | 53,9 | 32,1  | 75,7                |         | 102 | 54 | 52,4  | 32,9                | 71,9 |         |
| Liguria             |  | 98  | 47 | 48,3 | 28,5  | 68,2                |         | 100 | 49 | 50,2  | 30,6                | 69,7 |         |
| Lombardia           |  | 80  | 47 | 58,4 | 36,7  | 80,1                |         | 81  | 43 | 53,7  | 31,8                | 75,5 |         |
| Piemonte            |  | 93  | 47 | 50,5 | 30,0  | 70,9                |         | 97  | 54 | 56,3  | 36,5                | 76,1 |         |
| Sicilia             |  | 93  | 51 | 55,5 | 35,1  | 75,8                |         | 80  | 40 | 48,9  | 26,9                | 70,9 |         |
| Toscana             |  | 98  | 52 | 53,2 | 33,4  | 73,0                |         | 82  | 42 | 50,9  | 29,4                | 72,5 |         |
| Vegetable and Fruit |  |     |    |      |       |                     |         |     |    |       |                     |      |         |
|                     |  | N   | n  | %    | CI95% | $\chi^2$<br>p-value | N       | n   | %  | CI95% | $\chi^2$<br>p-value |      |         |
| Italian Region      |  |     |    |      |       |                     |         |     |    |       |                     |      |         |
| Basilicata          |  | 88  | 10 | 12,3 | 0,0   | 26,1                | <0,0001 | 95  | 17 | 17,4  | 2,2                 | 32,6 | <0,0001 |
| Calabria            |  | 75  | 4  | 5,7  | 0,0   | 16,1                |         | 67  | 7  | 10,4  | 0,0                 | 24,7 |         |
| Emilia-Romagna      |  | 86  | 9  | 9,9  | 0,0   | 22,4                |         | 81  | 22 | 27,7  | 8,1                 | 47,3 |         |
| Lazio               |  | 82  | 15 | 18,4 | 1,5   | 35,3                |         | 102 | 15 | 15,0  | 1,0                 | 29,0 |         |
| Liguria             |  | 98  | 13 | 13,8 | 0,1   | 27,5                |         | 100 | 22 | 22,7  | 6,3                 | 39,0 |         |
| Lombardia           |  | 80  | 11 | 14,4 | 0,0   | 29,9                |         | 81  | 15 | 19,1  | 1,9                 | 36,4 |         |
| Piemonte            |  | 93  | 17 | 18,4 | 2,5   | 34,2                |         | 97  | 23 | 24,1  | 7,0                 | 41,1 |         |
| Sicilia             |  | 93  | 10 | 11,5 | 0,0   | 24,5                |         | 80  | 15 | 18,9  | 1,7                 | 36,2 |         |
| Toscana             |  | 98  | 15 | 15,8 | 1,4   | 30,3                |         | 82  | 18 | 22,6  | 4,6                 | 40,6 |         |
| Fish                |  |     |    |      |       |                     |         |     |    |       |                     |      |         |
|                     |  | N   | n  | %    | CI95% | $\chi^2$<br>p-value | N       | n   | %  | CI95% | $\chi^2$<br>p-value |      |         |
| Italian Region      |  |     |    |      |       |                     |         |     |    |       |                     |      |         |
| Basilicata          |  | 88  | 38 | 43,6 | 22,8  | 64,4                | 0,0063  | 95  | 42 | 44,1  | 24,2                | 64,0 | 0,5027  |
| Calabria            |  | 75  | 36 | 47,3 | 24,9  | 69,6                |         | 67  | 26 | 38,5  | 15,6                | 61,4 |         |
| Emilia-Romagna      |  | 86  | 47 | 55,9 | 35,1  | 76,7                |         | 81  | 36 | 43,9  | 22,2                | 65,7 |         |
| Lazio               |  | 82  | 44 | 53,7 | 31,9  | 75,5                |         | 102 | 42 | 40,6  | 21,4                | 59,8 |         |
| Liguria             |  | 98  | 49 | 50,1 | 30,3  | 70,0                |         | 100 | 48 | 47,1  | 27,6                | 66,6 |         |
| Lombardia           |  | 80  | 25 | 32,4 | 11,8  | 53,0                |         | 81  | 28 | 33,3  | 12,6                | 54,0 |         |
| Piemonte            |  | 93  | 44 | 47,2 | 26,8  | 67,7                |         | 97  | 32 | 33,3  | 14,5                | 52,0 |         |
| Sicilia             |  | 93  | 35 | 38,2 | 18,3  | 58,1                |         | 80  | 34 | 43,5  | 21,7                | 65,3 |         |
| Toscana             |  | 98  | 32 | 31,9 | 13,4  | 50,3                |         | 82  | 31 | 38,5  | 17,6                | 59,5 |         |
| Cheese              |  |     |    |      |       |                     |         |     |    |       |                     |      |         |
|                     |  | N   | n  | %    | CI95% | $\chi^2$<br>p-value | N       | n   | %  | CI95% | $\chi^2$<br>p-value |      |         |
| Italian Region      |  |     |    |      |       |                     |         |     |    |       |                     |      |         |
| Basilicata          |  | 88  | 41 | 46,4 | 25,5  | 67,4                | 0,6374  | 95  | 55 | 58,8  | 39,0                | 78,5 | 0,4995  |
| Calabria            |  | 75  | 42 | 56,1 | 33,8  | 78,3                |         | 67  | 30 | 44,1  | 20,7                | 67,5 |         |
| Emilia-Romagna      |  | 86  | 34 | 39,9 | 19,4  | 60,4                |         | 81  | 40 | 49,8  | 27,9                | 71,7 |         |
| Lazio               |  | 82  | 37 | 45,1 | 23,4  | 66,8                |         | 102 | 52 | 50,6  | 31,0                | 70,2 |         |
| Liguria             |  | 98  | 43 | 43,4 | 23,8  | 63,1                |         | 100 | 56 | 56,6  | 37,3                | 76,0 |         |
| Lombardia           |  | 80  | 32 | 40,3 | 18,7  | 61,9                |         | 81  | 42 | 51,6  | 29,7                | 73,5 |         |
| Piemonte            |  | 93  | 40 | 42,2 | 22,0  | 62,5                |         | 97  | 51 | 52,2  | 32,3                | 72,1 |         |
| Sicilia             |  | 93  | 40 | 43,2 | 22,9  | 63,5                |         | 80  | 51 | 63,9  | 42,8                | 85,0 |         |
| Toscana             |  | 98  | 46 | 46,0 | 26,2  | 65,8                |         | 82  | 44 | 53,9  | 32,4                | 75,4 |         |

N: number of participants denominator.

n: number of participants related to the prevalence numerator.

For vegetables intake, the following foods were considered: leafy vegetables-cooked, leafy vegetables-raw, other vegetables, tomatoes-raw, tomatoes-cooked, root vegetables, cabbages, mushrooms, grain and pod vegetables, onion, garlic, stalk vegetables, mixed salad, mixed vegetables.

For vegetables intake were considered the following foods: leafy vegetable-cooked, leafy vegetable-raw, other vegetables, tomatoes-raw, tomatoes-cooked, root vegetables, cabbages, mushrooms, grain and pod vegetables, onion, garlic, stalk vegetables, mixed salad, mixed vegetables.

For fruits intake, the following foods were considered: citrus fruits and other fruits.

For fish intake, the following foods were considered: fish, crustaceans and molluscs.

For cheese intake, the following foods were considered: cheeses (including fresh cheeses).

Dietary information was collected by the self-administered Italian version of the food frequency questionnaire (FFQ) of the European Prospective Investigation into Cancer (EPIC).

A balanced nutrition was defined based on the following intake: vegetables ≥200 g/day; fruit 150-375 g/day; fish at least twice per week (150 g per serving); cheese no more than three times per week (50-100 g per serving); sausages, salami and other preserved meat no more than once per week (50 g per serving); cake and desserts no more than once per week (100 g per serving); sugar beverages less than one per week (330 ml); and consumption of alcoholic beverages limited to two glasses per day for men (24 g of ethanol), one glass per day for women (12 g of ethanol) and one glass per day for men and women aged 65-74 (12 g of ethanol).

SD: standard deviation; CI: confidence interval.

Prevalence was age standardized by Italian National Institute of Statistics-ISTAT Italian population 2019 (except when it is reported by age-classes).  
Chi-square test to compare prevalence among classes.

**Table S.5. Age-standardized (Italian population) balanced nutrition food groups intake (EPIC questionnaire): processed meat, sweets/cakes, sweet drinks and alcohol prevalence by region.**  
**Men and women residing in Italy aged 35-74 years, Health Examination Survey 2018-2019 - CUORE Project.**

|                |    | Men |      |        |                     |        | Women |    |      |        |                     |        |
|----------------|----|-----|------|--------|---------------------|--------|-------|----|------|--------|---------------------|--------|
| Processed meat |    |     |      |        |                     |        |       |    |      |        |                     |        |
|                | N  | n   | %    | CI 95% | $\chi^2$<br>p-value |        | N     | n  | %    | CI 95% | $\chi^2$<br>p-value |        |
| Italian Region |    |     |      |        |                     |        |       |    |      |        |                     |        |
| Basilicata     | 88 | 6   | 6,8  | 0,0    | 17,4                | 0,2917 | 95    | 19 | 19,3 | 3,5    | 35,2                | 0,0975 |
| Calabria       | 75 | 9   | 11,9 | 0,0    | 26,3                |        | 67    | 12 | 17,7 | 0,0    | 35,6                |        |
| Emilia-Romagna | 86 | 4   | 4,5  | 0,0    | 13,2                |        | 81    | 13 | 15,5 | 0,0    | 31,3                |        |
| Lazio          | 82 | 11  | 12,7 | 0,0    | 27,3                |        | 102   | 17 | 16,3 | 1,8    | 30,7                |        |
| Liguria        | 98 | 12  | 12,1 | 0,0    | 25,1                |        | 100   | 24 | 23,8 | 7,2    | 40,5                |        |
| Lombardia      | 80 | 10  | 11,7 | 0,0    | 25,8                |        | 81    | 15 | 17,7 | 1,0    | 34,4                |        |
| Piemonte       | 93 | 11  | 11,8 | 0,0    | 25,1                |        | 97    | 31 | 30,7 | 12,3   | 49,1                |        |
| Sicilia        | 93 | 11  | 11,6 | 0,0    | 24,7                |        | 80    | 14 | 17,2 | 0,6    | 33,8                |        |
| Toscana        | 98 | 17  | 17,0 | 2,1    | 31,9                |        | 82    | 23 | 27,7 | 8,4    | 47,0                |        |
| Sweets/Cakes   |    |     |      |        |                     |        |       |    |      |        |                     |        |
|                | N  | n   | %    | CI 95% | $\chi^2$<br>p-value |        | N     | n  | %    | CI 95% | $\chi^2$<br>p-value |        |
| Italian Region |    |     |      |        |                     |        |       |    |      |        |                     |        |
| Basilicata     | 88 | 7   | 8,4  | 0,0    | 20,0                | 0,1054 | 95    | 7  | 8,0  | 0,0    | 18,9                | 0,2031 |
| Calabria       | 75 | 15  | 18,8 | 1,3    | 36,3                |        | 67    | 12 | 18,2 | 0,0    | 36,4                |        |
| Emilia-Romagna | 86 | 5   | 5,6  | 0,0    | 15,3                |        | 81    | 11 | 12,6 | 0,0    | 27,1                |        |
| Lazio          | 82 | 6   | 7,3  | 0,0    | 18,7                |        | 102   | 11 | 10,0 | 0,0    | 21,7                |        |
| Liguria        | 98 | 10  | 10,4 | 0,0    | 22,4                |        | 100   | 11 | 11,0 | 0,0    | 23,3                |        |
| Lombardia      | 80 | 7   | 7,9  | 0,0    | 19,8                |        | 81    | 6  | 6,8  | 0,0    | 17,9                |        |
| Piemonte       | 93 | 7   | 7,6  | 0,0    | 18,4                |        | 97    | 9  | 8,9  | 0,0    | 20,3                |        |
| Sicilia        | 93 | 10  | 9,4  | 0,0    | 21,4                |        | 80    | 14 | 17,0 | 0,5    | 33,5                |        |
| Toscana        | 98 | 7   | 6,7  | 0,0    | 16,5                |        | 82    | 6  | 7,2  | 0,0    | 18,3                |        |
| Sweet Drinks   |    |     |      |        |                     |        |       |    |      |        |                     |        |
|                | N  | n   | %    | CI 95% | $\chi^2$<br>p-value |        | N     | n  | %    | CI 95% | $\chi^2$<br>p-value |        |
| Italian Region |    |     |      |        |                     |        |       |    |      |        |                     |        |
| Basilicata     | 88 | 44  | 49,9 | 28,9   | 70,9                | 0,6748 | 95    | 59 | 62,0 | 42,5   | 81,5                | 0,5949 |
| Calabria       | 75 | 39  | 50,0 | 27,6   | 72,4                |        | 67    | 40 | 59,8 | 36,7   | 82,9                |        |
| Emilia-Romagna | 86 | 50  | 56,4 | 35,7   | 77,2                |        | 81    | 44 | 53,0 | 31,1   | 74,8                |        |
| Lazio          | 82 | 43  | 52,2 | 30,3   | 74,0                |        | 102   | 54 | 52,6 | 33,0   | 72,1                |        |
| Liguria        | 98 | 52  | 52,5 | 32,6   | 72,3                |        | 100   | 58 | 58,0 | 38,8   | 77,3                |        |
| Lombardia      | 80 | 44  | 54,7 | 32,8   | 76,7                |        | 81    | 50 | 60,0 | 38,5   | 81,5                |        |
| Piemonte       | 93 | 48  | 51,7 | 31,2   | 72,1                |        | 97    | 64 | 65,2 | 46,2   | 84,2                |        |
| Sicilia        | 93 | 60  | 64,2 | 44,6   | 83,9                |        | 80    | 50 | 63,1 | 41,8   | 84,3                |        |
| Toscana        | 98 | 52  | 53,3 | 33,5   | 73,1                |        | 82    | 54 | 65,0 | 44,5   | 85,6                |        |
| Alcohol        |    |     |      |        |                     |        |       |    |      |        |                     |        |
|                | N  | n   | %    | CI 95% | $\chi^2$<br>p-value |        | N     | n  | %    | CI 95% | $\chi^2$<br>p-value |        |
| Italian Region |    |     |      |        |                     |        |       |    |      |        |                     |        |
| Basilicata     | 88 | 56  | 65,4 | 45,4   | 85,4                | 0,0320 | 95    | 81 | 84,9 | 70,5   | 99,3                | 0,0320 |
| Calabria       | 75 | 58  | 77,5 | 58,8   | 96,2                |        | 67    | 63 | 93,6 | 82,1   | 105,1               |        |
| Emilia-Romagna | 86 | 57  | 66,7 | 47,0   | 86,5                |        | 81    | 68 | 84,6 | 68,8   | 100,4               |        |
| Lazio          | 82 | 69  | 85,6 | 70,3   | 101,0               |        | 102   | 86 | 83,7 | 69,2   | 98,1                |        |
| Liguria        | 98 | 70  | 72,5 | 54,8   | 90,2                |        | 100   | 80 | 80,4 | 64,9   | 95,9                |        |
| Lombardia      | 80 | 57  | 70,9 | 50,9   | 90,9                |        | 81    | 69 | 84,9 | 69,2   | 100,6               |        |
| Piemonte       | 93 | 64  | 70,8 | 52,2   | 89,4                |        | 97    | 75 | 77,3 | 60,6   | 94,0                |        |
| Sicilia        | 93 | 76  | 82,6 | 67,0   | 98,1                |        | 80    | 73 | 91,3 | 78,9   | 103,7               |        |
| Toscana        | 98 | 74  | 76,7 | 59,9   | 93,5                |        | 82    | 67 | 82,1 | 65,5   | 98,6                |        |

N: number of participants denominator.

n: number of participants related to the prevalence numerator.

For processed meat intake, the following foods were considered: sausages, salami and other preserved meat.

For sweets/cakes intake, the following foods were considered: sugar, honey, jam, chocolate, candy bars, paste, confetti/flakes, confectionery non chocolate, ice cream, cakes, pies, pastries, puddings (not milk based), dry cakes, biscuits.

For sweet beverages intake, the following foods were considered: fruit and vegetable juices, carbonated/soft/isotonic drinks, diluted syrups.

For alcohol intake, the following foods were considered: alcoholic beverages.

Dietary information was collected by the self-administered Italian version of the food frequency questionnaire (FFQ) of the European Prospective Investigation into Cancer (EPIC).

A balanced nutrition was defined based on the following intake: vegetables  $\geq 200$  g/day; fruit 150-375 g/day; fish at least twice per week (150 g per serving); cheese no more than three times per week (50-100 g per serving); sausages, salami and other preserved meat no more than once per week (50 g per serving); cake and desserts no more than once per week (100 g per serving); sugar beverages less than one per week (330 ml); and consumption of alcoholic beverages limited to two glasses per day for men (24 g of ethanol), one glass per day for women (12 g of ethanol) and one glass per day for men and women aged 65-74 (12 g of ethanol).

SD: standard deviation; CI: confidence interval.

Prevalence was age standardized by Italian National Institute of Statistics-ISTAT Italian population 2019 (except when it is reported by age-classes).

Chi-square test to compare prevalence among classes.

**Table S.6. Age-standardized (Italian population) balanced nutrition (EPIC questionnaire): vegetables, fruit, fish and cheese mean by region.**

**Men and women residing in Italy aged 35-74 years, Health Examination Survey 2018-2019 - CUORE Project.**

|                             | Men  |       |       |        |       | Women         |     |       |       |        |       |               |
|-----------------------------|------|-------|-------|--------|-------|---------------|-----|-------|-------|--------|-------|---------------|
| Vegetable (g/day)           |      |       |       |        |       |               |     |       |       |        |       |               |
|                             | N    | Mean  | SD    | CI 95% |       | anova p-value | N   | Mean  | SD    | CI 95% |       | anova p-value |
| Italian Region              |      |       |       |        |       |               |     |       |       |        |       |               |
| Basilicata                  | 88   | 161,4 | 109,1 | 138,6  | 184,2 | <0,0001       | 95  | 181,2 | 85,0  | 164,1  | 198,3 | <0,0001       |
| Calabria                    | 75   | 168,4 | 105,0 | 144,7  | 192,2 |               | 67  | 181,1 | 92,8  | 158,9  | 203,3 |               |
| Emilia-Romagna              | 86   | 169,2 | 95,1  | 149,1  | 189,3 |               | 81  | 185,5 | 99,2  | 163,9  | 207,1 |               |
| Lazio                       | 82   | 183,1 | 88,0  | 164,1  | 202,2 |               | 102 | 191,5 | 89,8  | 174,0  | 208,9 |               |
| Liguria                     | 98   | 169,7 | 86,2  | 152,7  | 186,8 |               | 100 | 175,9 | 105,9 | 155,1  | 196,6 |               |
| Lombardia                   | 80   | 143,5 | 93,6  | 123,0  | 164,0 |               | 81  | 167,4 | 97,4  | 146,2  | 188,6 |               |
| Piemonte                    | 93   | 183,1 | 89,8  | 164,8  | 201,3 |               | 97  | 203,6 | 93,9  | 184,9  | 222,3 |               |
| Sicilia                     | 93   | 151,7 | 80,6  | 135,3  | 168,1 |               | 80  | 157,4 | 87,4  | 138,3  | 176,6 |               |
| Toscana                     | 98   | 182,8 | 91,7  | 164,6  | 200,9 |               | 82  | 210,5 | 107,1 | 187,3  | 233,6 |               |
| Fruit (g/day)               |      |       |       |        |       |               |     |       |       |        |       |               |
|                             | N    | Mean  | SD    | CI 95% |       | anova p-value | N   | Mean  | SD    | CI 95% |       | anova p-value |
| Italian Region              |      |       |       |        |       |               |     |       |       |        |       |               |
| Basilicata                  | 88   | 272,6 | 175,3 | 235,9  | 309,2 | 0,0269        | 95  | 285,2 | 168,3 | 251,4  | 319,1 | 0,0269        |
| Calabria                    | 75   | 331,0 | 215,4 | 282,3  | 379,8 |               | 67  | 267,9 | 174,1 | 226,2  | 309,6 |               |
| Emilia-Romagna              | 86   | 279,0 | 197,7 | 237,2  | 320,8 |               | 81  | 299,0 | 141,6 | 268,2  | 329,8 |               |
| Lazio                       | 82   | 282,3 | 175,9 | 244,2  | 320,4 |               | 102 | 286,9 | 167,1 | 254,5  | 319,3 |               |
| Liguria                     | 98   | 264,5 | 155,2 | 233,8  | 295,2 |               | 100 | 285,9 | 182,1 | 250,3  | 321,6 |               |
| Lombardia                   | 80   | 220,8 | 134,6 | 191,3  | 250,3 |               | 81  | 266,1 | 176,0 | 227,8  | 304,4 |               |
| Piemonte                    | 93   | 254,2 | 175,4 | 218,5  | 289,8 |               | 97  | 256,5 | 146,4 | 227,4  | 285,6 |               |
| Sicilia                     | 93   | 268,4 | 162,2 | 235,4  | 301,4 |               | 80  | 220,4 | 134,1 | 191,0  | 249,8 |               |
| Toscana                     | 98,0 | 247,8 | 163,2 | 215,5  | 280,1 |               | 82  | 307,1 | 178,8 | 268,4  | 345,8 |               |
| Vegetable and Fruit (g/day) |      |       |       |        |       |               |     |       |       |        |       |               |
|                             | N    | Mean  | SD    | CI 95% |       | anova p-value | N   | Mean  | SD    | CI 95% |       | anova p-value |
| Italian Region              |      |       |       |        |       |               |     |       |       |        |       |               |
| Basilicata                  | 88   | 434,0 | 214,8 | 389,1  | 478,9 | 0,0026        | 95  | 466,4 | 208,4 | 424,5  | 508,4 | 0,0026        |
| Calabria                    | 75   | 499,4 | 280,3 | 436,0  | 562,9 |               | 67  | 449,0 | 215,3 | 397,5  | 500,6 |               |
| Emilia-Romagna              | 86   | 448,2 | 253,7 | 394,6  | 501,8 |               | 81  | 484,5 | 203,0 | 440,3  | 528,7 |               |
| Lazio                       | 82   | 465,4 | 209,5 | 420,1  | 510,7 |               | 102 | 478,4 | 215,9 | 436,5  | 520,3 |               |
| Liguria                     | 98   | 434,2 | 200,9 | 394,5  | 474,0 |               | 100 | 461,8 | 244,0 | 414,0  | 509,6 |               |
| Lombardia                   | 80   | 364,3 | 188,4 | 323,0  | 405,5 |               | 81  | 433,5 | 213,7 | 387,0  | 480,0 |               |
| Piemonte                    | 93   | 437,2 | 218,2 | 392,9  | 481,6 |               | 97  | 460,1 | 186,7 | 422,9  | 497,3 |               |
| Sicilia                     | 93   | 420,1 | 193,9 | 380,7  | 459,5 |               | 80  | 377,8 | 173,1 | 339,9  | 415,8 |               |
| Toscana                     | 98   | 430,6 | 210,2 | 388,9  | 472,2 |               | 82  | 517,5 | 236,5 | 466,4  | 568,7 |               |
| Fish (g/day)                |      |       |       |        |       |               |     |       |       |        |       |               |
|                             | N    | Mean  | SD    | CI 95% |       | anova p-value | N   | Mean  | SD    | CI 95% |       | anova p-value |
| Italian Region              |      |       |       |        |       |               |     |       |       |        |       |               |
| Basilicata                  | 88   | 46,1  | 38,3  | 38,1   | 54,1  | <0,0001       | 95  | 43,4  | 31,3  | 37,1   | 49,7  | <0,0001       |
| Calabria                    | 75   | 48,8  | 35,5  | 40,8   | 56,8  |               | 67  | 44,9  | 37,7  | 35,9   | 53,9  |               |
| Emilia-Romagna              | 86   | 51,9  | 31,0  | 45,4   | 58,4  |               | 81  | 45,3  | 32,6  | 38,2   | 52,4  |               |
| Lazio                       | 82   | 50,7  | 35,0  | 43,1   | 58,2  |               | 102 | 42,6  | 26,2  | 37,5   | 47,7  |               |
| Liguria                     | 98   | 56,1  | 41,8  | 47,9   | 64,4  |               | 100 | 48,4  | 31,0  | 42,3   | 54,5  |               |
| Lombardia                   | 80   | 36,4  | 25,0  | 31,0   | 41,9  |               | 81  | 40,7  | 26,4  | 35,0   | 46,5  |               |
| Piemonte                    | 93   | 44,6  | 41,2  | 36,3   | 53,0  |               | 97  | 36,2  | 25,5  | 31,1   | 41,3  |               |
| Sicilia                     | 93   | 41,9  | 33,2  | 35,2   | 48,7  |               | 80  | 38,8  | 23,6  | 33,7   | 44,0  |               |
| Toscana                     | 98   | 33,5  | 19,7  | 29,5   | 37,4  |               | 82  | 43,8  | 39,7  | 35,2   | 52,4  |               |
| Cheese (g/day)              |      |       |       |        |       |               |     |       |       |        |       |               |
|                             | N    | Mean  | SD    | CI 95% |       | anova p-value | N   | Mean  | SD    | CI 95% |       | anova p-value |
| Italian Region              |      |       |       |        |       |               |     |       |       |        |       |               |
| Basilicata                  | 88   | 43,2  | 36,3  | 35,6   | 50,7  | 0,0445        | 95  | 33,6  | 26,8  | 28,2   | 39,0  | 0,0445        |
| Calabria                    | 75   | 35,1  | 30,2  | 28,3   | 42,0  |               | 67  | 41,7  | 32,7  | 33,8   | 49,5  |               |
| Emilia-Romagna              | 86   | 54,3  | 43,9  | 45,0   | 63,6  |               | 81  | 41,5  | 39,4  | 32,9   | 50,1  |               |
| Lazio                       | 82   | 41,1  | 34,4  | 33,6   | 48,5  |               | 102 | 35,4  | 28,2  | 29,9   | 40,8  |               |
| Liguria                     | 98   | 46,8  | 36,0  | 39,7   | 53,9  |               | 100 | 36,7  | 35,6  | 29,7   | 43,7  |               |
| Lombardia                   | 80   | 43,8  | 34,8  | 36,2   | 51,4  |               | 81  | 38,1  | 28,0  | 32,0   | 44,2  |               |
| Piemonte                    | 93   | 40,5  | 29,6  | 34,5   | 46,6  |               | 97  | 37,9  | 29,0  | 32,1   | 43,7  |               |
| Sicilia                     | 93   | 42,8  | 31,5  | 36,4   | 49,2  |               | 80  | 30,3  | 29,5  | 23,8   | 36,7  |               |
| Toscana                     | 98   | 36,3  | 26,4  | 31,1   | 41,6  |               | 82  | 39,2  | 30,3  | 32,6   | 45,8  |               |

For vegetables intake, the following foods were considered: leafy vegetables-cooked, leafy vegetables-raw, other vegetables, tomatoes-raw, tomatoes-cooked, root vegetables, cabbages, mushrooms, grain and pod vegetables, onion, garlic, stalk vegetables, mixed salad, mixed vegetables.

For vegetables intake were considered the following foods: leafy vegetable-cooked, leafy vegetable-raw, other vegetables, tomatoes-raw, tomatoes-cooked, root vegetables, cabbages, mushrooms, grain and pod vegetables, onion, garlic, stalk vegetables, mixed salad, mixed vegetables.

For fruits intake, the following foods were considered: citrus fruits and other fruits.

For fish intake, the following foods were considered: fish, crustaceans and molluscs.

For cheese intake, the following foods were considered: cheeses (including fresh cheeses).

Dietary information was collected by the self-administered Italian version of the food frequency questionnaire (FFQ) of the European Prospective Investigation into Cancer (EPIC).

SD: standard deviation; CI: confidence interval.

Means and standard deviations were age standardized by Italian National Institute of Statistics-ISTAT Italian population 2019 (except when they are reported by age-classes).

Anova to compare mean values among classes.

**Table S.7. Age-standardized (Italian population) food group intake (EPIC questionnaire): processed meat, sweets/cakes, sweet drinks and alcohol mean by region.**

**Men and women residing in Italy aged 35-74 years, Health Examination Survey 2018-2019 - CUORE Project.**

|                        | Men |       |       |        |       |               | Women |      |       |        |       |               |
|------------------------|-----|-------|-------|--------|-------|---------------|-------|------|-------|--------|-------|---------------|
| Processed meat (g/day) |     |       |       |        |       |               |       |      |       |        |       |               |
|                        | N   | Mean  | SD    | CI 95% |       | anova p-value | N     | Mean | SD    | CI 95% |       | anova p-value |
| Italian Region         |     |       |       |        |       |               |       |      |       |        |       |               |
| Basilicata             | 88  | 42,4  | 37,4  | 34,6   | 50,2  | 0,0003        | 95    | 26,1 | 21,5  | 21,7   | 30,4  | 0,0003        |
| Calabria               | 75  | 40,3  | 31,5  | 33,2   | 47,5  |               | 67    | 26,5 | 22,1  | 21,2   | 31,8  |               |
| Emilia-Romagna         | 86  | 42,1  | 31,4  | 35,5   | 48,8  |               | 81    | 27,3 | 22,2  | 22,5   | 32,1  |               |
| Lazio                  | 82  | 36,2  | 26,8  | 30,4   | 42,0  |               | 102   | 26,5 | 22,2  | 22,2   | 30,8  |               |
| Liguria                | 98  | 30,0  | 24,0  | 25,3   | 34,8  |               | 100   | 22,7 | 19,3  | 19,0   | 26,5  |               |
| Lombardia              | 80  | 31,4  | 21,0  | 26,8   | 36,0  |               | 81    | 24,8 | 20,2  | 20,4   | 29,2  |               |
| Piemonte               | 93  | 30,5  | 23,7  | 25,7   | 35,3  |               | 97    | 20,9 | 23,4  | 16,3   | 25,6  |               |
| Sicilia                | 93  | 41,9  | 30,4  | 35,7   | 48,1  |               | 80    | 25,1 | 22,8  | 20,1   | 30,1  |               |
| Toscana                | 98  | 33,4  | 27,1  | 28,1   | 38,8  |               | 82    | 20,6 | 20,6  | 16,1   | 25,0  |               |
| Sweets/Cakes (g/day)   |     |       |       |        |       |               |       |      |       |        |       |               |
|                        | N   | Mean  | SD    | CI 95% |       | anova p-value | N     | Mean | SD    | CI 95% |       | anova p-value |
| Italian Region         |     |       |       |        |       |               |       |      |       |        |       |               |
| Basilicata             | 88  | 83,4  | 55,4  | 71,8   | 95,0  | 0,0630        | 95    | 83,2 | 66,4  | 69,8   | 96,5  | 0,0630        |
| Calabria               | 75  | 79,5  | 67,7  | 64,2   | 94,9  |               | 67    | 73,2 | 74,3  | 55,4   | 91,0  |               |
| Emilia-Romagna         | 86  | 93,9  | 62,5  | 80,7   | 107,1 |               | 81    | 89,0 | 66,9  | 74,5   | 103,6 |               |
| Lazio                  | 82  | 75,5  | 51,0  | 64,5   | 86,6  |               | 102   | 64,5 | 44,7  | 55,9   | 73,2  |               |
| Liguria                | 98  | 91,0  | 66,3  | 77,8   | 104,1 |               | 100   | 73,0 | 57,5  | 61,8   | 84,3  |               |
| Lombardia              | 80  | 87,5  | 61,9  | 73,9   | 101,1 |               | 81    | 85,6 | 47,0  | 75,4   | 95,9  |               |
| Piemonte               | 93  | 78,6  | 51,2  | 68,2   | 89,0  |               | 97    | 76,8 | 63,0  | 64,3   | 89,4  |               |
| Sicilia                | 93  | 85,0  | 63,7  | 72,1   | 98,0  |               | 80    | 69,5 | 60,6  | 56,2   | 82,8  |               |
| Toscana                | 98  | 81,4  | 56,4  | 70,3   | 92,6  |               | 82    | 84,9 | 72,3  | 69,3   | 100,6 |               |
| Sweet Drinks (ml/day)  |     |       |       |        |       |               |       |      |       |        |       |               |
|                        | N   | Mean  | SD    | CI 95% |       | anova p-value | N     | Mean | SD    | CI 95% |       | anova p-value |
| Italian Region         |     |       |       |        |       |               |       |      |       |        |       |               |
| Basilicata             | 88  | 119,3 | 161,4 | 85,6   | 153,0 | 0,4315        | 95    | 89,8 | 172,6 | 55,1   | 124,5 | 0,4315        |
| Calabria               | 75  | 124,7 | 209,9 | 77,2   | 172,2 |               | 67    | 57,7 | 83,7  | 37,6   | 77,7  |               |
| Emilia-Romagna         | 86  | 93,6  | 140,2 | 64,0   | 123,3 |               | 81    | 89,8 | 146,4 | 58,0   | 121,7 |               |
| Lazio                  | 82  | 104,2 | 178,4 | 65,6   | 142,8 |               | 102   | 80,6 | 138,8 | 53,6   | 107,5 |               |
| Liguria                | 98  | 104,7 | 161,9 | 72,7   | 136,8 |               | 100   | 68,9 | 95,8  | 50,1   | 87,7  |               |
| Lombardia              | 80  | 96,3  | 140,4 | 65,5   | 127,0 |               | 81    | 65,5 | 112,9 | 40,9   | 90,1  |               |
| Piemonte               | 93  | 79,4  | 110,0 | 57,1   | 101,8 |               | 97    | 72,3 | 155,0 | 41,4   | 103,1 |               |
| Sicilia                | 93  | 116,6 | 216,6 | 72,6   | 160,6 |               | 80    | 58,8 | 107,8 | 35,2   | 82,4  |               |
| Toscana                | 98  | 66,3  | 80,5  | 50,4   | 82,3  |               | 82    | 63,6 | 117,0 | 38,2   | 88,9  |               |
| Alcohol (g/day)        |     |       |       |        |       |               |       |      |       |        |       |               |
|                        | N   | Mean  | SD    | CI 95% |       | anova p-value | N     | Mean | SD    | CI 95% |       | anova p-value |
| Italian Region         |     |       |       |        |       |               |       |      |       |        |       |               |
| Basilicata             | 88  | 18,6  | 22,3  | 13,9   | 23,2  | 0,0007        | 95    | 4,5  | 8,2   | 2,9    | 6,2   | 0,0007        |
| Calabria               | 75  | 14,5  | 16,4  | 10,8   | 18,2  |               | 67    | 2,5  | 6,5   | 1,0    | 4,1   |               |
| Emilia-Romagna         | 86  | 17,5  | 14,9  | 14,4   | 20,7  |               | 81    | 5,6  | 11,2  | 3,2    | 8,1   |               |
| Lazio                  | 82  | 9,2   | 11,7  | 6,7    | 11,7  |               | 102   | 5,6  | 8,5   | 4,0    | 7,3   |               |
| Liguria                | 98  | 15,1  | 16,1  | 11,9   | 18,3  |               | 100   | 6,8  | 10,7  | 4,7    | 8,9   |               |
| Lombardia              | 80  | 16,6  | 18,9  | 12,5   | 20,8  |               | 81    | 5,6  | 9,0   | 3,6    | 7,5   |               |
| Piemonte               | 93  | 15,8  | 14,8  | 12,7   | 18,8  |               | 97    | 8,5  | 10,4  | 6,4    | 10,6  |               |
| Sicilia                | 93  | 10,3  | 13,1  | 7,7    | 13,0  |               | 80    | 3,1  | 6,4   | 1,8    | 4,5   |               |
| Toscana                | 98  | 14,5  | 15,4  | 11,5   | 17,5  |               | 82    | 6,1  | 8,0   | 4,3    | 7,8   |               |

For processed meat intake, the following foods were considered: sausages, salami and other preserved meat.

For sweets/cakes intake, the following foods were considered: sugar, honey, jam, chocolate, candy bars, paste, confetti/flakes, confectionery non chocolate, ice cream, cakes, pies, pastries, puddings (not milk based), dry cakes, biscuits.

For sweet beverages intake, the following foods were considered: fruit and vegetable juices, carbonated/soft/isotonic drinks, diluted syrups.

For alcohol intake, the following foods were considered: alcoholic beverages.

Dietary information was collected by the self-administered Italian version of the food frequency questionnaire (FFQ) of the European Prospective Investigation into Cancer (EPIC).

SD: standard deviation; CI: confidence interval.

Means and standard deviations were age standardized by Italian National Institute of Statistics-ISTAT Italian population 2019 (except when they are reported by age-classes).

Anova to compare mean values among classes.

**Table S.8. Age-standardized (Italian population) food group intake (EPIC questionnaire): cereals, potatoes, legumes and oil mean by region.**

**Men and women residing in Italy aged 35-74 years, Health Examination Survey 2018-2019 - CUORE Project.**

|                  | Men |       |       |        |       |                  | Women |       |      |        |       |                  |
|------------------|-----|-------|-------|--------|-------|------------------|-------|-------|------|--------|-------|------------------|
| Cereals (g/day)  |     |       |       |        |       |                  |       |       |      |        |       |                  |
|                  | N   | Mean  | SD    | CI 95% |       | anova<br>p-value | N     | Mean  | SD   | CI 95% |       | anova<br>p-value |
| Italian Region   |     |       |       |        |       |                  |       |       |      |        |       |                  |
| Basilicata       | 88  | 178,8 | 96,2  | 158,7  | 198,9 | 0,0202           | 95    | 148,1 | 85,2 | 131,0  | 165,3 | 0,0202           |
| Calabria         | 75  | 153,6 | 89,1  | 133,4  | 173,7 |                  | 67    | 135,5 | 84,4 | 115,3  | 155,7 |                  |
| Emilia-Romagna   | 86  | 206,1 | 97,4  | 185,5  | 226,7 |                  | 81    | 135,1 | 87,9 | 116,0  | 154,2 |                  |
| Lazio            | 82  | 161,4 | 83,6  | 143,3  | 179,4 |                  | 102   | 138,3 | 82,8 | 122,2  | 154,3 |                  |
| Liguria          | 98  | 182,2 | 96,9  | 163,0  | 201,4 |                  | 100   | 124,6 | 80,5 | 108,8  | 140,4 |                  |
| Lombardia        | 80  | 171,5 | 90,9  | 151,6  | 191,4 |                  | 81    | 124,5 | 70,0 | 109,2  | 139,7 |                  |
| Piemonte         | 93  | 165,9 | 109,0 | 143,7  | 188,0 |                  | 97    | 143,1 | 98,6 | 123,5  | 162,8 |                  |
| Sicilia          | 93  | 179,4 | 95,9  | 159,9  | 198,9 |                  | 80    | 118,0 | 86,8 | 99,0   | 137,1 |                  |
| Toscana          | 98  | 189,2 | 90,4  | 171,3  | 207,1 |                  | 82    | 152,9 | 81,1 | 135,4  | 170,5 |                  |
| Potatoes (g/day) |     |       |       |        |       |                  |       |       |      |        |       |                  |
|                  | N   | Mean  | SD    | CI 95% |       | anova<br>p-value | N     | Mean  | SD   | CI 95% |       | anova<br>p-value |
| Italian Region   |     |       |       |        |       |                  |       |       |      |        |       |                  |
| Basilicata       | 88  | 22,2  | 17,6  | 18,6   | 25,9  | 0,0077           | 95    | 22,8  | 18,6 | 19,1   | 26,6  | 0,0077           |
| Calabria         | 75  | 26,9  | 23,5  | 21,6   | 32,3  |                  | 67    | 30,7  | 42,8 | 20,5   | 41,0  |                  |
| Emilia-Romagna   | 86  | 22,8  | 21,1  | 18,3   | 27,3  |                  | 81    | 19,9  | 19,1 | 15,8   | 24,1  |                  |
| Lazio            | 82  | 25,6  | 22,4  | 20,8   | 30,4  |                  | 102   | 18,1  | 17,8 | 14,6   | 21,5  |                  |
| Liguria          | 98  | 23,6  | 21,6  | 19,4   | 27,9  |                  | 100   | 20,7  | 20,9 | 16,6   | 24,8  |                  |
| Lombardia        | 80  | 21,3  | 18,9  | 17,2   | 25,5  |                  | 81    | 17,2  | 14,2 | 14,1   | 20,2  |                  |
| Piemonte         | 93  | 21,6  | 19,1  | 17,8   | 25,5  |                  | 97    | 19,4  | 18,7 | 15,7   | 23,2  |                  |
| Sicilia          | 93  | 21,2  | 16,1  | 17,9   | 24,5  |                  | 80    | 21,0  | 19,7 | 16,7   | 25,3  |                  |
| Toscana          | 98  | 21,6  | 18,5  | 17,9   | 25,2  |                  | 82    | 21,5  | 22,3 | 16,7   | 26,3  |                  |
| Legumes (g/day)  |     |       |       |        |       |                  |       |       |      |        |       |                  |
|                  | N   | Mean  | SD    | CI 95% |       | anova<br>p-value | N     | Mean  | SD   | CI 95% |       | anova<br>p-value |
| Italian Region   |     |       |       |        |       |                  |       |       |      |        |       |                  |
| Basilicata       | 88  | 28,7  | 17,2  | 25,1   | 32,3  | <0,0001          | 95    | 28,0  | 13,8 | 25,3   | 30,8  | <0,0001          |
| Calabria         | 75  | 31,4  | 26,9  | 25,3   | 37,5  |                  | 67    | 29,9  | 21,4 | 24,8   | 35,0  |                  |
| Emilia-Romagna   | 86  | 17,6  | 15,5  | 14,3   | 20,9  |                  | 81    | 18,6  | 17,3 | 14,9   | 22,4  |                  |
| Lazio            | 82  | 23,7  | 22,2  | 18,9   | 28,5  |                  | 102   | 21,2  | 17,5 | 17,8   | 24,6  |                  |
| Liguria          | 98  | 19,7  | 19,5  | 15,8   | 23,5  |                  | 100   | 13,3  | 12,9 | 10,8   | 15,8  |                  |
| Lombardia        | 80  | 15,4  | 14,9  | 12,1   | 18,6  |                  | 81    | 17,4  | 13,3 | 14,5   | 20,3  |                  |
| Piemonte         | 93  | 18,5  | 18,0  | 14,8   | 22,2  |                  | 97    | 16,3  | 12,2 | 13,9   | 18,8  |                  |
| Sicilia          | 93  | 18,8  | 13,0  | 16,2   | 21,5  |                  | 80    | 16,2  | 11,1 | 13,7   | 18,6  |                  |
| Toscana          | 98  | 22,1  | 16,1  | 18,9   | 25,2  |                  | 82    | 17,6  | 15,0 | 14,3   | 20,8  |                  |
| Oil (g/day)      |     |       |       |        |       |                  |       |       |      |        |       |                  |
|                  | N   | Mean  | SD    | CI 95% |       | anova<br>p-value | N     | Mean  | SD   | CI 95% |       | anova<br>p-value |
| Italian Region   |     |       |       |        |       |                  |       |       |      |        |       |                  |
| Basilicata       | 88  | 15,6  | 10,9  | 13,3   | 17,8  | <0,0001          | 95    | 17,6  | 9,3  | 15,7   | 19,5  | <0,0001          |
| Calabria         | 75  | 13,5  | 12,3  | 10,7   | 16,3  |                  | 67    | 14,8  | 10,7 | 12,2   | 17,3  |                  |
| Emilia-Romagna   | 86  | 16,1  | 12,2  | 13,5   | 18,7  |                  | 81    | 16,5  | 12,2 | 13,8   | 19,1  |                  |
| Lazio            | 82  | 18,8  | 11,4  | 16,4   | 21,3  |                  | 102   | 19,5  | 10,5 | 17,5   | 21,6  |                  |
| Liguria          | 98  | 16,7  | 11,8  | 14,3   | 19,0  |                  | 100   | 17,0  | 12,2 | 14,6   | 19,4  |                  |
| Lombardia        | 80  | 14,0  | 10,3  | 11,8   | 16,3  |                  | 81    | 16,1  | 11,6 | 13,6   | 18,6  |                  |
| Piemonte         | 93  | 18,4  | 11,1  | 16,2   | 20,7  |                  | 97    | 19,6  | 10,1 | 17,6   | 21,6  |                  |
| Sicilia          | 93  | 11,6  | 10,1  | 9,6    | 13,7  |                  | 80    | 12,5  | 10,4 | 10,2   | 14,7  |                  |
| Toscana          | 98  | 17,7  | 10,8  | 15,6   | 19,9  |                  | 82    | 21,5  | 11,9 | 18,9   | 24,1  |                  |

For cereals intake, the following foods were considered: pasta, rice, white and whole meal bread, other grains, crispbread, rusks, and breakfast cereals.

For potatoes intake, the following foods were considered: french fries, boiled potatoes, roasted potatoes, pure potatoes, croquette potatoes.

Dietary information was collected by the self-administered Italian version of the food frequency questionnaire (FFQ) of the European Prospective Investigation into Cancer (EPIC).

SD: standard deviation; CI: confidence interval.

Means and standard deviations were age standardized by Italian National Institute of Statistics-ISTAT Italian population 2019 (except when they are reported by age-classes).

Anova to compare mean values among classes.



**Table S.9. Age-standardized (Italian population) food group intake (EPIC questionnaire): meat, eggs, milk mean by region.**

**Men and women residing in Italy aged 35-74 years, Health Examination Survey 2018-2019 - CUORE Project.**

|                | Men |       |       |        |       |                  | Women |       |       |        |       |                  |
|----------------|-----|-------|-------|--------|-------|------------------|-------|-------|-------|--------|-------|------------------|
| Meat (g/day)   |     |       |       |        |       |                  |       |       |       |        |       |                  |
|                | N   | Mean  | SD    | CI 95% |       | anova<br>p-value | N     | Mean  | SD    | CI 95% |       | anova<br>p-value |
| Italian Region |     |       |       |        |       |                  |       |       |       |        |       |                  |
| Basilicata     | 88  | 87,6  | 52,5  | 76,6   | 98,6  | 0,0132           | 95    | 78,4  | 41,7  | 70,0   | 86,8  | 0,0132           |
| Calabria       | 75  | 87,9  | 68,6  | 72,4   | 103,4 |                  | 67    | 77,4  | 50,5  | 65,3   | 89,5  |                  |
| Emilia-Romagna | 86  | 111,1 | 61,7  | 98,1   | 124,2 |                  | 81    | 90,8  | 53,9  | 79,1   | 102,5 |                  |
| Lazio          | 82  | 94,1  | 51,2  | 83,0   | 105,2 |                  | 102   | 84,7  | 49,3  | 75,2   | 94,3  |                  |
| Liguria        | 98  | 83,5  | 49,4  | 73,8   | 93,3  |                  | 100   | 77,6  | 52,5  | 67,3   | 87,8  |                  |
| Lombardia      | 80  | 99,0  | 61,7  | 85,5   | 112,5 |                  | 81    | 74,3  | 45,7  | 64,3   | 84,2  |                  |
| Piemonte       | 93  | 84,2  | 54,0  | 73,2   | 95,2  |                  | 97    | 80,9  | 56,0  | 69,7   | 92,0  |                  |
| Sicilia        | 93  | 109,4 | 56,4  | 97,9   | 120,9 |                  | 80    | 76,7  | 51,9  | 65,3   | 88,1  |                  |
| Toscana        | 98  | 94,5  | 58,9  | 82,9   | 106,2 |                  | 82    | 82,6  | 48,3  | 72,1   | 93,1  |                  |
| Eggs (g/day)   |     |       |       |        |       |                  |       |       |       |        |       |                  |
|                | N   | Mean  | SD    | CI 95% |       | anova<br>p-value | N     | Mean  | SD    | CI 95% |       | anova<br>p-value |
| Italian Region |     |       |       |        |       |                  |       |       |       |        |       |                  |
| Basilicata     | 88  | 11,6  | 11,2  | 9,3    | 14,0  | 0,2727           | 95    | 8,5   | 6,2   | 7,2    | 9,7   | 0,2727           |
| Calabria       | 75  | 10,2  | 9,5   | 8,0    | 12,3  |                  | 67    | 9,3   | 7,4   | 7,5    | 11,1  |                  |
| Emilia-Romagna | 86  | 10,8  | 13,8  | 7,9    | 13,7  |                  | 81    | 10,9  | 11,1  | 8,5    | 13,3  |                  |
| Lazio          | 82  | 11,3  | 9,1   | 9,3    | 13,3  |                  | 102   | 10,6  | 8,3   | 9,0    | 12,3  |                  |
| Liguria        | 98  | 10,4  | 8,6   | 8,7    | 12,1  |                  | 100   | 10,1  | 9,1   | 8,3    | 11,9  |                  |
| Lombardia      | 80  | 9,3   | 8,1   | 7,5    | 11,1  |                  | 81    | 9,4   | 7,1   | 7,8    | 10,9  |                  |
| Piemonte       | 93  | 11,1  | 9,8   | 9,1    | 13,1  |                  | 97    | 12,2  | 10,5  | 10,1   | 14,3  |                  |
| Sicilia        | 93  | 12,8  | 9,4   | 10,9   | 14,7  |                  | 80    | 10,0  | 7,3   | 8,4    | 11,6  |                  |
| Toscana        | 98  | 10,4  | 10,0  | 8,4    | 12,4  |                  | 82    | 9,3   | 7,7   | 7,7    | 11,0  |                  |
| Milk (ml/day)  |     |       |       |        |       |                  |       |       |       |        |       |                  |
|                | N   | Mean  | SD    | CI 95% |       | anova<br>p-value | N     | Mean  | SD    | CI 95% |       | anova<br>p-value |
| Italian Region |     |       |       |        |       |                  |       |       |       |        |       |                  |
| Basilicata     | 88  | 71,2  | 97,6  | 50,8   | 91,6  | 0,6302           | 95    | 114,0 | 112,6 | 91,4   | 136,7 | 0,6302           |
| Calabria       | 75  | 79,4  | 139,1 | 48,0   | 110,9 |                  | 67    | 108,7 | 128,8 | 77,9   | 139,5 |                  |
| Emilia-Romagna | 86  | 73,7  | 97,7  | 53,0   | 94,3  |                  | 81    | 90,9  | 108,1 | 67,4   | 114,5 |                  |
| Lazio          | 82  | 79,6  | 93,8  | 59,3   | 99,9  |                  | 102   | 93,7  | 104,3 | 73,5   | 114,0 |                  |
| Liguria        | 98  | 93,0  | 119,4 | 69,3   | 116,6 |                  | 100   | 92,0  | 115,8 | 69,3   | 114,7 |                  |
| Lombardia      | 80  | 80,6  | 88,8  | 61,2   | 100,1 |                  | 81    | 110,1 | 133,2 | 81,1   | 139,1 |                  |
| Piemonte       | 93  | 78,7  | 128,0 | 52,7   | 104,7 |                  | 97    | 80,2  | 94,2  | 61,4   | 98,9  |                  |
| Sicilia        | 93  | 88,5  | 112,1 | 65,7   | 111,3 |                  | 80    | 87,4  | 129,9 | 59,0   | 115,9 |                  |
| Toscana        | 98  | 80,9  | 109,6 | 59,2   | 102,6 |                  | 82    | 126,1 | 129,2 | 98,1   | 154,0 |                  |

For meats intake, the following foods were considered: beef, veal, pork, horse, chicken, turkey, rabbit (domestic).

Dietary information was collected by the self-administered Italian version of the food frequency questionnaire (FFQ) of the European Prospective Investigation into Cancer (EPIC).

SD: standard deviation; CI: confidence interval.

Means and standard deviations were age standardized by Italian National Institute of Statistics-ISTAT Italian population 2019 (except when they are reported by age-classes).

Anova to compare mean values among classes.

**Table S.10. Age-standardized (Italian population) nutrients intake (EPIC questionnaire): proteins (total, animal and vegetable) mean by region.**

**Men and women residing in Italy aged 35-74 years, Health Examination Survey 2018-2019 - CUORE Project.**

|                                   | Men |      |     |        |      |                  | Women |      |     |        |      |                  |
|-----------------------------------|-----|------|-----|--------|------|------------------|-------|------|-----|--------|------|------------------|
| Proteins Tot (% total Kcal)       |     |      |     |        |      |                  |       |      |     |        |      |                  |
|                                   | N   | Mean | SD  | CI 95% |      | anova<br>p-value | N     | Mean | SD  | CI 95% |      | anova<br>p-value |
| Italian Region                    |     |      |     |        |      |                  |       |      |     |        |      |                  |
| Basilicata                        | 88  | 14,9 | 2,3 | 14,5   | 15,4 | 0,001            | 95    | 16,0 | 4,3 | 15,2   | 16,9 | 0,001            |
| Calabria                          | 75  | 16,2 | 6,0 | 14,8   | 17,5 |                  | 67    | 16,4 | 3,4 | 15,6   | 17,2 |                  |
| Emilia-Romagna                    | 86  | 15,6 | 2,5 | 15,0   | 16,1 |                  | 81    | 16,2 | 3,2 | 15,5   | 16,9 |                  |
| Lazio                             | 82  | 16,0 | 2,4 | 15,5   | 16,5 |                  | 102   | 16,6 | 4,6 | 15,7   | 17,5 |                  |
| Liguria                           | 98  | 15,1 | 2,3 | 14,6   | 15,6 |                  | 100   | 16,0 | 3,5 | 15,3   | 16,7 |                  |
| Lombardia                         | 80  | 15,4 | 2,9 | 14,8   | 16,1 |                  | 81    | 15,6 | 3,1 | 14,9   | 16,2 |                  |
| Piemonte                          | 93  | 15,2 | 2,8 | 14,6   | 15,7 |                  | 97    | 15,8 | 3,2 | 15,2   | 16,5 |                  |
| Sicilia                           | 93  | 16,2 | 2,7 | 15,7   | 16,7 |                  | 80    | 16,6 | 3,4 | 15,9   | 17,3 |                  |
| Toscana                           | 98  | 15,0 | 2,5 | 14,5   | 15,5 |                  | 82    | 15,2 | 2,6 | 14,7   | 15,8 |                  |
| Animal proteins (% total Kcal)    |     |      |     |        |      |                  |       |      |     |        |      |                  |
|                                   | N   | Mean | SD  | CI 95% |      | anova<br>p-value | N     | Mean | SD  | CI 95% |      | anova<br>p-value |
| Italian Region                    |     |      |     |        |      |                  |       |      |     |        |      |                  |
| Basilicata                        | 88  | 9,8  | 3,0 | 9,2    | 10,4 | 0,0032           | 95    | 10,6 | 4,6 | 9,6    | 11,5 | 0,0032           |
| Calabria                          | 75  | 11,1 | 6,6 | 9,7    | 12,6 |                  | 67    | 11,1 | 4,3 | 10,1   | 12,1 |                  |
| Emilia-Romagna                    | 86  | 10,5 | 3,2 | 9,9    | 11,2 |                  | 81    | 11,2 | 3,8 | 10,4   | 12,0 |                  |
| Lazio                             | 82  | 10,8 | 2,8 | 10,2   | 11,4 |                  | 102   | 11,3 | 5,3 | 10,3   | 12,3 |                  |
| Liguria                           | 98  | 10,1 | 2,9 | 9,5    | 10,6 |                  | 100   | 11,1 | 4,1 | 10,3   | 11,9 |                  |
| Lombardia                         | 80  | 10,5 | 3,2 | 9,8    | 11,2 |                  | 81    | 10,6 | 3,3 | 9,8    | 11,3 |                  |
| Piemonte                          | 93  | 10,1 | 3,6 | 9,3    | 10,8 |                  | 97    | 10,4 | 3,9 | 9,6    | 11,1 |                  |
| Sicilia                           | 93  | 11,0 | 3,3 | 10,4   | 11,7 |                  | 80    | 11,4 | 3,8 | 10,6   | 12,2 |                  |
| Toscana                           | 98  | 9,6  | 3,2 | 8,9    | 10,2 |                  | 82    | 9,9  | 3,2 | 9,2    | 10,6 |                  |
| Vegetable proteins (% total Kcal) |     |      |     |        |      |                  |       |      |     |        |      |                  |
|                                   | N   | Mean | SD  | CI 95% |      | anova<br>p-value | N     | Mean | SD  | CI 95% |      | anova<br>p-value |
| Italian Region                    |     |      |     |        |      |                  |       |      |     |        |      |                  |
| Basilicata                        | 88  | 5,1  | 1,4 | 4,8    | 5,4  | 0,0015           | 95    | 5,5  | 1,3 | 5,2    | 5,7  | 0,0015           |
| Calabria                          | 75  | 5,0  | 1,1 | 4,8    | 5,3  |                  | 67    | 5,3  | 1,5 | 5,0    | 5,7  |                  |
| Emilia-Romagna                    | 86  | 5,0  | 1,1 | 4,8    | 5,3  |                  | 81    | 5,0  | 1,2 | 4,7    | 5,2  |                  |
| Lazio                             | 82  | 5,2  | 1,0 | 5,0    | 5,4  |                  | 102   | 5,3  | 1,2 | 5,1    | 5,6  |                  |
| Liguria                           | 98  | 5,0  | 1,1 | 4,8    | 5,3  |                  | 100   | 4,9  | 1,1 | 4,7    | 5,1  |                  |
| Lombardia                         | 80  | 5,0  | 1,0 | 4,7    | 5,2  |                  | 81    | 5,0  | 1,0 | 4,8    | 5,2  |                  |
| Piemonte                          | 93  | 5,1  | 1,3 | 4,9    | 5,4  |                  | 97    | 5,5  | 1,3 | 5,2    | 5,7  |                  |
| Sicilia                           | 93  | 5,1  | 1,3 | 4,9    | 5,4  |                  | 80    | 5,2  | 1,3 | 4,9    | 5,5  |                  |
| Toscana                           | 98  | 5,5  | 1,2 | 5,2    | 5,7  |                  | 82    | 5,3  | 1,1 | 5,0    | 5,5  |                  |

Dietary information was collected by the self-administered Italian version of the food frequency questionnaire (FFQ) of the European Prospective Investigation into Cancer (EPIC).

SD: standard deviation; CI: confidence interval.

Means and standard deviations were age standardized by Italian National Institute of Statistics-ISTAT Italian population 2019 (except when they are reported by age-classes).

Anova to compare mean values among classes.

**Table S.11. Age-standardized (Italian population) nutrients intake (EPIC questionnaire): lipids (animal and vegetable) and cholesterol mean by region.**

**Men and women residing in Italy aged 35-74 years, Health Examination Survey 2018-2019 - CUORE Project.**

|                                 | Men |       |      |        |       |                  | Women |       |      |        |       |                  |
|---------------------------------|-----|-------|------|--------|-------|------------------|-------|-------|------|--------|-------|------------------|
| Animal Lipids (% total Kcal)    |     |       |      |        |       |                  |       |       |      |        |       |                  |
|                                 | N   | Mean  | SD   | CI 95% |       | anova<br>p-value | N     | Mean  | SD   | CI 95% |       | anova<br>p-value |
| Italian Region                  |     |       |      |        |       |                  |       |       |      |        |       |                  |
| Basilicata                      | 88  | 18,0  | 6,0  | 16,7   | 19,2  | 0,0017           | 95    | 17,0  | 4,5  | 16,1   | 17,9  | 0,0017           |
| Calabria                        | 75  | 17,9  | 5,1  | 16,8   | 19,1  |                  | 67    | 18,6  | 6,7  | 17,0   | 20,3  |                  |
| Emilia-Romagna                  | 86  | 18,5  | 5,2  | 17,4   | 19,6  |                  | 81    | 18,6  | 4,6  | 17,6   | 19,5  |                  |
| Lazio                           | 82  | 17,8  | 5,1  | 16,7   | 18,9  |                  | 102   | 16,9  | 5,2  | 15,9   | 17,9  |                  |
| Liguria                         | 98  | 18,3  | 5,0  | 17,3   | 19,3  |                  | 100   | 17,7  | 5,1  | 16,6   | 18,7  |                  |
| Lombardia                       | 80  | 17,9  | 4,7  | 16,9   | 19,0  |                  | 81    | 18,1  | 4,6  | 17,1   | 19,1  |                  |
| Piemonte                        | 93  | 17,3  | 5,3  | 16,2   | 18,4  |                  | 97    | 16,8  | 4,9  | 15,8   | 17,8  |                  |
| Sicilia                         | 93  | 19,1  | 5,6  | 18,0   | 20,2  |                  | 80    | 18,4  | 5,5  | 17,2   | 19,6  |                  |
| Toscana                         | 98  | 16,7  | 5,4  | 15,6   | 17,8  |                  | 82    | 16,8  | 5,0  | 15,8   | 17,9  |                  |
| Vegetable Lipids (% total Kcal) |     |       |      |        |       |                  |       |       |      |        |       |                  |
|                                 | N   | Mean  | SD   | CI 95% |       | anova<br>p-value | N     | Mean  | SD   | CI 95% |       | anova<br>p-value |
| Italian Region                  |     |       |      |        |       |                  |       |       |      |        |       |                  |
| Basilicata                      | 88  | 15,9  | 5,6  | 14,7   | 17,0  | 0,0009           | 95    | 18,9  | 4,8  | 17,9   | 19,9  | 0,0009           |
| Calabria                        | 75  | 16,9  | 5,2  | 15,7   | 18,0  |                  | 67    | 19,4  | 6,1  | 18,0   | 20,9  |                  |
| Emilia-Romagna                  | 86  | 16,5  | 4,9  | 15,5   | 17,6  |                  | 81    | 18,5  | 5,8  | 17,3   | 19,8  |                  |
| Lazio                           | 82  | 17,9  | 5,4  | 16,8   | 19,1  |                  | 102   | 19,9  | 6,3  | 18,7   | 21,2  |                  |
| Liguria                         | 98  | 17,3  | 4,9  | 16,3   | 18,3  |                  | 100   | 20,9  | 7,3  | 19,5   | 22,4  |                  |
| Lombardia                       | 80  | 16,1  | 7,6  | 14,4   | 17,7  |                  | 81    | 20,0  | 6,1  | 18,7   | 21,3  |                  |
| Piemonte                        | 93  | 18,7  | 5,7  | 17,5   | 19,8  |                  | 97    | 20,8  | 6,9  | 19,5   | 22,2  |                  |
| Sicilia                         | 93  | 16,6  | 5,3  | 15,5   | 17,6  |                  | 80    | 20,1  | 6,6  | 18,6   | 21,5  |                  |
| Toscana                         | 98  | 18,3  | 6,4  | 17,0   | 19,5  |                  | 82    | 20,5  | 6,7  | 19,1   | 22,0  |                  |
| Cholesterol (mg/day)            |     |       |      |        |       |                  |       |       |      |        |       |                  |
|                                 | N   | Mean  | SD   | CI 95% |       | anova<br>p-value | N     | Mean  | SD   | CI 95% |       | anova<br>p-value |
| Italian Region                  |     |       |      |        |       |                  |       |       |      |        |       |                  |
| Basilicata                      | 88  | 151,6 | 42,4 | 142,7  | 160,4 | 0,0023           | 95    | 157,0 | 42,6 | 148,4  | 165,5 | 0,0023           |
| Calabria                        | 75  | 164,7 | 71,4 | 148,6  | 180,9 |                  | 67    | 164,8 | 63,9 | 149,5  | 180,1 |                  |
| Emilia-Romagna                  | 86  | 150,7 | 44,6 | 141,3  | 160,1 |                  | 81    | 168,8 | 43,3 | 159,4  | 178,2 |                  |
| Lazio                           | 82  | 155,0 | 41,0 | 146,2  | 163,9 |                  | 102   | 155,7 | 51,0 | 145,7  | 165,6 |                  |
| Liguria                         | 98  | 152,8 | 40,3 | 144,8  | 160,8 |                  | 100   | 164,7 | 49,9 | 154,9  | 174,5 |                  |
| Lombardia                       | 80  | 148,5 | 40,9 | 139,6  | 157,5 |                  | 81    | 159,8 | 62,3 | 146,3  | 173,4 |                  |
| Piemonte                        | 93  | 149,9 | 46,5 | 140,4  | 159,3 |                  | 97    | 160,5 | 51,8 | 150,2  | 170,8 |                  |
| Sicilia                         | 93  | 169,1 | 46,5 | 159,6  | 178,5 |                  | 80    | 174,2 | 63,5 | 160,3  | 188,1 |                  |
| Toscana                         | 98  | 148,0 | 52,3 | 137,6  | 158,4 |                  | 82    | 150,4 | 48,1 | 140,0  | 160,8 |                  |

Dietary information was collected by the self-administered Italian version of the food frequency questionnaire (FFQ) of the European Prospective Investigation into Cancer (EPIC).

SD: standard deviation; CI: confidence interval.

Means and standard deviations were age standardized by Italian National Institute of Statistics-ISTAT Italian population 2019 (except when they are reported by age-classes).

Anova to compare mean values among classes.

**Table S.12. Age-standardized (Italian population) nutrients intake (EPIC questionnaire): saturated, polyunsaturated and monounsaturated fat, lipids total mean by region.**

**Men and women residing in Italy aged 35-74 years, Health Examination Survey 2018-2019 - CUORE Project.**

|                                    | Men |      |     |        |      |                  | Women |      |     |        |      |                  |
|------------------------------------|-----|------|-----|--------|------|------------------|-------|------|-----|--------|------|------------------|
| Saturated fat (% total Kcal)       |     |      |     |        |      |                  |       |      |     |        |      |                  |
|                                    | N   | Mean | SD  | CI 95% |      | anova<br>p-value | N     | Mean | SD  | CI 95% |      | anova<br>p-value |
| Italian Region                     |     |      |     |        |      |                  |       |      |     |        |      |                  |
| Basilicata                         | 88  | 10,7 | 2,9 | 10,1   | 11,3 | 0,0064           | 95    | 10,9 | 2,2 | 10,4   | 11,3 | 0,0064           |
| Calabria                           | 75  | 10,7 | 2,0 | 10,2   | 11,1 |                  | 67    | 12,0 | 3,1 | 11,2   | 12,7 |                  |
| Emilia-Romagna                     | 86  | 11,3 | 2,4 | 10,8   | 11,8 |                  | 81    | 11,7 | 2,4 | 11,1   | 12,2 |                  |
| Lazio                              | 82  | 10,8 | 2,5 | 10,2   | 11,3 |                  | 102   | 10,8 | 2,2 | 10,4   | 11,3 |                  |
| Liguria                            | 98  | 11,3 | 2,3 | 10,8   | 11,7 |                  | 100   | 11,5 | 2,3 | 11,0   | 11,9 |                  |
| Lombardia                          | 80  | 10,9 | 2,3 | 10,5   | 11,4 |                  | 81    | 11,8 | 2,1 | 11,3   | 12,3 |                  |
| Piemonte                           | 93  | 11,1 | 2,5 | 10,5   | 11,6 |                  | 97    | 11,2 | 2,2 | 10,8   | 11,6 |                  |
| Sicilia                            | 93  | 11,2 | 2,5 | 10,7   | 11,7 |                  | 80    | 11,7 | 2,9 | 11,1   | 12,4 |                  |
| Toscana                            | 98  | 10,5 | 2,5 | 10,1   | 11,0 |                  | 82    | 11,2 | 2,4 | 10,7   | 11,7 |                  |
| Polyunsaturated fat (% total Kcal) |     |      |     |        |      |                  |       |      |     |        |      |                  |
|                                    | N   | Mean | SD  | CI 95% |      | anova<br>p-value | N     | Mean | SD  | CI 95% |      | anova<br>p-value |
| Italian Region                     |     |      |     |        |      |                  |       |      |     |        |      |                  |
| Basilicata                         | 88  | 4,8  | 1,7 | 4,4    | 5,1  | 0,2010           | 95    | 5,1  | 1,2 | 4,9    | 5,4  | 0,2010           |
| Calabria                           | 75  | 5,3  | 1,3 | 5,0    | 5,6  |                  | 67    | 5,3  | 1,2 | 5,0    | 5,6  |                  |
| Emilia-Romagna                     | 86  | 5,0  | 1,1 | 4,8    | 5,3  |                  | 81    | 5,3  | 1,2 | 5,1    | 5,6  |                  |
| Lazio                              | 82  | 5,2  | 1,3 | 5,0    | 5,5  |                  | 102   | 5,2  | 1,2 | 5,0    | 5,5  |                  |
| Liguria                            | 98  | 4,8  | 1,2 | 4,6    | 5,0  |                  | 100   | 5,4  | 1,4 | 5,1    | 5,7  |                  |
| Lombardia                          | 80  | 4,9  | 1,5 | 4,6    | 5,2  |                  | 81    | 5,6  | 1,8 | 5,2    | 6,0  |                  |
| Piemonte                           | 93  | 5,0  | 1,3 | 4,7    | 5,3  |                  | 97    | 5,4  | 1,5 | 5,1    | 5,7  |                  |
| Sicilia                            | 93  | 5,2  | 1,4 | 4,9    | 5,4  |                  | 80    | 5,5  | 1,4 | 5,2    | 5,8  |                  |
| Toscana                            | 98  | 5,0  | 1,2 | 4,8    | 5,3  |                  | 82    | 5,2  | 1,3 | 4,9    | 5,4  |                  |
| Monounsaturated fat (% total Kcal) |     |      |     |        |      |                  |       |      |     |        |      |                  |
|                                    | N   | Mean | SD  | CI 95% |      | anova<br>p-value | N     | Mean | SD  | CI 95% |      | anova<br>p-value |
| Italian Region                     |     |      |     |        |      |                  |       |      |     |        |      |                  |
| Basilicata                         | 88  | 15,5 | 4,0 | 14,7   | 16,3 | 0,0134           | 95    | 17,0 | 3,2 | 16,3   | 17,6 | 0,0134           |
| Calabria                           | 75  | 16,0 | 3,4 | 15,3   | 16,8 |                  | 67    | 17,8 | 4,1 | 16,8   | 18,7 |                  |
| Emilia-Romagna                     | 86  | 15,7 | 2,8 | 15,1   | 16,3 |                  | 81    | 16,9 | 4,1 | 16,0   | 17,8 |                  |
| Lazio                              | 82  | 16,6 | 3,3 | 15,9   | 17,3 |                  | 102   | 17,6 | 3,5 | 16,9   | 18,2 |                  |
| Liguria                            | 98  | 16,5 | 3,3 | 15,8   | 17,1 |                  | 100   | 18,4 | 4,9 | 17,5   | 19,4 |                  |
| Lombardia                          | 80  | 15,3 | 4,6 | 14,3   | 16,3 |                  | 81    | 17,5 | 3,5 | 16,7   | 18,2 |                  |
| Piemonte                           | 93  | 16,8 | 3,6 | 16,1   | 17,6 |                  | 97    | 17,8 | 4,1 | 17,0   | 18,6 |                  |
| Sicilia                            | 93  | 16,3 | 3,8 | 15,5   | 17,1 |                  | 80    | 18,0 | 4,6 | 17,0   | 19,0 |                  |
| Toscana                            | 98  | 16,5 | 3,9 | 15,7   | 17,3 |                  | 82    | 17,9 | 4,2 | 17,0   | 18,8 |                  |
| Lipids Tot (% total Kcal)          |     |      |     |        |      |                  |       |      |     |        |      |                  |
|                                    | N   | Mean | SD  | CI 95% |      | anova<br>p-value | N     | Mean | SD  | CI 95% |      | anova<br>p-value |
| Italian Region                     |     |      |     |        |      |                  |       |      |     |        |      |                  |
| Basilicata                         | 88  | 33,8 | 8,1 | 32,1   | 35,5 | 0,0534           | 95    | 35,9 | 5,9 | 34,7   | 37,1 | 0,0534           |
| Calabria                           | 75  | 34,8 | 6,1 | 33,4   | 36,2 |                  | 67    | 38,1 | 7,0 | 36,4   | 39,8 |                  |
| Emilia-Romagna                     | 86  | 35,0 | 5,1 | 33,9   | 36,1 |                  | 81    | 37,1 | 6,9 | 35,6   | 38,5 |                  |
| Lazio                              | 82  | 35,7 | 6,1 | 34,4   | 37,1 |                  | 102   | 36,8 | 5,6 | 35,7   | 37,9 |                  |
| Liguria                            | 98  | 35,6 | 5,6 | 34,5   | 36,7 |                  | 100   | 38,6 | 7,1 | 37,2   | 40,0 |                  |
| Lombardia                          | 80  | 34,0 | 7,3 | 32,4   | 35,6 |                  | 81    | 38,1 | 5,3 | 36,9   | 39,3 |                  |
| Piemonte                           | 93  | 35,9 | 6,5 | 34,6   | 37,3 |                  | 97    | 37,7 | 6,7 | 36,3   | 39,0 |                  |
| Sicilia                            | 93  | 35,7 | 7,1 | 34,2   | 37,1 |                  | 80    | 38,5 | 7,7 | 36,8   | 40,1 |                  |
| Toscana                            | 98  | 35,0 | 6,8 | 33,6   | 36,3 |                  | 82    | 37,4 | 6,4 | 36,0   | 38,7 |                  |

Dietary information was collected by the self-administered Italian version of the food frequency questionnaire (FFQ) of the European Prospective Investigation into Cancer (EPIC).

SD: standard deviation; CI: confidence interval.

Means and standard deviations were age standardized by Italian National Institute of Statistics-ISTAT Italian population 2019 (except when they are reported by age-classes).

Anova to compare mean values among classes.

**Table S.13. Age-standardized (Italian population) nutrients intake (EPIC questionnaire) fiber, sodium, potassium, carbohydrates and simple carbohydrates mean by region.**

**Men and women residing in Italy aged 35-74 years, Health Examination Survey 2018-2019 - CUORE Project.**

|                                     | Men |      |      |        |      |               | Women |      |     |        |      |               |
|-------------------------------------|-----|------|------|--------|------|---------------|-------|------|-----|--------|------|---------------|
| Fiber (g/day)                       |     |      |      |        |      |               |       |      |     |        |      |               |
|                                     | N   | Mean | SD   | CI 95% |      | anova p-value | N     | Mean | SD  | CI 95% |      | anova p-value |
| Italian Region                      |     |      |      |        |      |               |       |      |     |        |      |               |
| Basilicata                          | 88  | 9,7  | 2,8  | 9,2    | 10,3 | <0,0001       | 95,0  | 11,6 | 2,9 | 11,0   | 12,2 | <0,0001       |
| Calabria                            | 75  | 10,4 | 2,9  | 9,8    | 11,1 |               | 67,0  | 11,4 | 2,8 | 10,7   | 12,1 |               |
| Emilia-Romagna                      | 86  | 9,3  | 2,6  | 8,8    | 9,9  |               | 81,0  | 11,0 | 3,1 | 10,3   | 11,6 |               |
| Lazio                               | 82  | 10,4 | 3,0  | 9,8    | 11,1 |               | 102,0 | 11,6 | 3,1 | 11,0   | 12,2 |               |
| Liguria                             | 98  | 9,4  | 2,5  | 8,9    | 9,9  |               | 100,0 | 10,7 | 2,7 | 10,1   | 11,2 |               |
| Lombardia                           | 80  | 9,1  | 2,2  | 8,6    | 9,6  |               | 81,0  | 10,9 | 3,0 | 10,2   | 11,6 |               |
| Piemonte                            | 93  | 10,3 | 3,2  | 9,7    | 11,0 |               | 97,0  | 11,8 | 3,4 | 11,1   | 12,5 |               |
| Sicilia                             | 93  | 9,5  | 2,3  | 9,1    | 10,0 |               | 80,0  | 10,9 | 2,6 | 10,3   | 11,5 |               |
| Toscana                             | 98  | 10,3 | 2,7  | 9,8    | 10,9 |               | 82,0  | 11,5 | 2,8 | 10,9   | 12,1 |               |
| Sodium (g/day)                      |     |      |      |        |      |               |       |      |     |        |      |               |
|                                     | N   | Mean | SD   | CI 95% |      | anova p-value | N     | Mean | SD  | CI 95% |      | anova p-value |
| Italian Region                      |     |      |      |        |      |               |       |      |     |        |      |               |
| Basilicata                          | 88  | 2,7  | 1,1  | 2,4    | 2,9  | 0,001         | 95    | 2,1  | 1,0 | 1,9    | 2,3  | 0,001         |
| Calabria                            | 75  | 2,4  | 1,1  | 2,1    | 2,6  |               | 67    | 2,1  | 0,9 | 1,9    | 2,3  |               |
| Emilia-Romagna                      | 86  | 3,0  | 1,1  | 2,7    | 3,2  |               | 81    | 2,3  | 1,1 | 2,0    | 2,5  |               |
| Lazio                               | 82  | 2,4  | 0,9  | 2,2    | 2,6  |               | 102   | 2,1  | 1,0 | 1,9    | 2,3  |               |
| Liguria                             | 98  | 2,5  | 1,0  | 2,3    | 2,7  |               | 100   | 2,0  | 0,9 | 1,9    | 2,2  |               |
| Lombardia                           | 80  | 2,4  | 0,9  | 2,2    | 2,6  |               | 81    | 2,1  | 0,7 | 1,9    | 2,2  |               |
| Piemonte                            | 93  | 2,3  | 0,9  | 2,1    | 2,5  |               | 97    | 2,0  | 1,0 | 1,8    | 2,2  |               |
| Sicilia                             | 93  | 2,6  | 1,1  | 2,3    | 2,8  |               | 80    | 1,9  | 1,0 | 1,6    | 2,1  |               |
| Toscana                             | 98  | 2,5  | 0,9  | 2,3    | 2,6  |               | 82    | 2,2  | 0,9 | 2,0    | 2,4  |               |
| Potassium (g/day)                   |     |      |      |        |      |               |       |      |     |        |      |               |
|                                     | N   | Mean | SD   | CI 95% |      | anova p-value | N     | Mean | SD  | CI 95% |      | anova p-value |
| Italian Region                      |     |      |      |        |      |               |       |      |     |        |      |               |
| Basilicata                          | 88  | 3,2  | 1,2  | 2,9    | 3,4  | 0,0100        | 95    | 3,1  | 1,1 | 2,9    | 3,3  | 0,0096        |
| Calabria                            | 75  | 3,4  | 1,4  | 3,0    | 3,7  |               | 67    | 3,0  | 1,0 | 2,8    | 3,3  |               |
| Emilia-Romagna                      | 86  | 3,5  | 1,1  | 3,2    | 3,7  |               | 81    | 3,1  | 1,1 | 2,9    | 3,4  |               |
| Lazio                               | 82  | 3,2  | 0,8  | 3,0    | 3,3  |               | 102   | 3,0  | 0,9 | 2,8    | 3,2  |               |
| Liguria                             | 98  | 3,2  | 1,2  | 3,0    | 3,5  |               | 100   | 3,0  | 1,1 | 2,8    | 3,2  |               |
| Lombardia                           | 80  | 2,9  | 0,8  | 2,7    | 3,1  |               | 81    | 2,9  | 0,9 | 2,7    | 3,1  |               |
| Piemonte                            | 93  | 3,1  | 0,9  | 2,9    | 3,3  |               | 97    | 3,0  | 0,9 | 2,9    | 3,2  |               |
| Sicilia                             | 93  | 3,1  | 1,0  | 2,9    | 3,3  |               | 80    | 2,6  | 1,0 | 2,4    | 2,9  |               |
| Toscana                             | 98  | 3,1  | 0,9  | 3,0    | 3,3  |               | 82    | 3,2  | 1,1 | 3,0    | 3,5  |               |
| Carbohydrate (% total Kcal)         |     |      |      |        |      |               |       |      |     |        |      |               |
|                                     | N   | Mean | SD   | CI 95% |      | anova p-value | N     | Mean | SD  | CI 95% |      | anova p-value |
| Italian Region                      |     |      |      |        |      |               |       |      |     |        |      |               |
| Basilicata                          | 88  | 48,8 | 10,9 | 46,5   | 51,1 | 0,1206        | 95    | 49,6 | 8,5 | 47,9   | 51,3 | 0,1206        |
| Calabria                            | 75  | 47,9 | 9,9  | 45,6   | 50,1 |               | 67    | 47,7 | 9,4 | 45,5   | 50,0 |               |
| Emilia-Romagna                      | 86  | 47,2 | 7,3  | 45,6   | 48,7 |               | 81    | 47,8 | 9,5 | 45,8   | 49,9 |               |
| Lazio                               | 82  | 48,3 | 7,6  | 46,6   | 49,9 |               | 102   | 47,6 | 7,8 | 46,1   | 49,1 |               |
| Liguria                             | 98  | 48,0 | 7,5  | 46,5   | 49,5 |               | 100   | 46,0 | 9,4 | 44,1   | 47,8 |               |
| Lombardia                           | 80  | 48,4 | 9,4  | 46,4   | 50,5 |               | 81    | 47,4 | 7,4 | 45,8   | 49,1 |               |
| Piemonte                            | 93  | 46,3 | 9,4  | 44,4   | 48,3 |               | 97    | 46,3 | 9,1 | 44,5   | 48,2 |               |
| Sicilia                             | 93  | 48,2 | 9,8  | 46,2   | 50,2 |               | 80    | 46,5 | 9,9 | 44,4   | 48,7 |               |
| Toscana                             | 98  | 48,4 | 8,7  | 46,7   | 50,2 |               | 82    | 48,0 | 8,5 | 46,2   | 49,8 |               |
| Simple carbohydrates (% total Kcal) |     |      |      |        |      |               |       |      |     |        |      |               |
|                                     | N   | Mean | SD   | CI 95% |      | anova p-value | N     | Mean | SD  | CI 95% |      | anova p-value |
| Italian Region                      |     |      |      |        |      |               |       |      |     |        |      |               |
| Basilicata                          | 88  | 18,6 | 6,7  | 17,2   | 20,0 | 0,5132        | 95    | 20,5 | 6,2 | 19,3   | 21,7 | 0,5132        |
| Calabria                            | 75  | 19,5 | 8,1  | 17,7   | 21,4 |               | 67    | 19,0 | 6,9 | 17,3   | 20,6 |               |
| Emilia-Romagna                      | 86  | 17,5 | 5,6  | 16,3   | 18,7 |               | 81    | 21,1 | 7,0 | 19,5   | 22,6 |               |
| Lazio                               | 82  | 19,6 | 6,0  | 18,3   | 20,8 |               | 102   | 19,7 | 6,1 | 18,5   | 20,9 |               |
| Liguria                             | 98  | 18,5 | 5,9  | 17,3   | 19,6 |               | 100   | 20,2 | 7,0 | 18,8   | 21,5 |               |
| Lombardia                           | 80  | 19,1 | 6,3  | 17,8   | 20,5 |               | 81    | 21,4 | 7,1 | 19,9   | 23,0 |               |
| Piemonte                            | 93  | 18,7 | 4,9  | 17,8   | 19,7 |               | 97    | 19,5 | 5,9 | 18,3   | 20,7 |               |
| Sicilia                             | 93  | 18,4 | 7,0  | 17,0   | 19,8 |               | 80    | 19,3 | 7,0 | 17,8   | 20,9 |               |
| Toscana                             | 98  | 17,6 | 5,1  | 16,6   | 18,6 |               | 82    | 20,4 | 6,7 | 19,0   | 21,9 |               |

Dietary information was collected by the self-administered Italian version of the food frequency questionnaire (FFQ) of the European Prospective Investigation into Cancer (EPIC).

SD: standard deviation; CI: confidence interval.

Means and standard deviations were age standardized by Italian National Institute of Statistics-ISTAT Italian population 2019 (except when they are reported by age-classes).

Anova to compare mean values among classes.

**Table S.14. Age-standardized (European standard population) current smokers and former smokers prevalence, and mean number of cigarettes smoked per day, by sex, age classes, geographical area and educational level. Cigarette, cigar and pipe smokers prevalence.**

**Men and women residing in Italy aged 35-74 years, Health Examination Survey 2018-2019 - CUORE Project.**

|                                    | Men  |       |      |        |       |                           | Women |       |       |        |       |                           |
|------------------------------------|------|-------|------|--------|-------|---------------------------|-------|-------|-------|--------|-------|---------------------------|
| Current Smokers                    |      |       |      |        |       |                           |       |       |       |        |       |                           |
|                                    | N    | n     | %    | CI 95% |       | χ <sup>2</sup><br>p-value | N     | n     | %     | CI 95% |       | χ <sup>2</sup><br>p-value |
| All                                | 1031 | 234   | 23,2 | 18,0   | 28,3  |                           | 1059  | 196   | 18,68 | 13,98  | 23,39 |                           |
| Age classes (years)                |      |       |      |        |       |                           |       |       |       |        |       |                           |
| 35-44                              | 249  | 72    | 28,9 | 23,3   | 34,6  | 0,007                     | 235   | 49    | 20,9  | 15,7   | 26,1  | 0,2763                    |
| 45-54                              | 248  | 63    | 25,4 | 20,0   | 30,8  |                           | 271   | 48    | 17,7  | 13,2   | 22,3  |                           |
| 55-64                              | 276  | 54    | 19,6 | 14,9   | 24,3  |                           | 276   | 57    | 20,7  | 15,9   | 25,4  |                           |
| 65-74                              | 258  | 45    | 17,4 | 12,8   | 22,1  |                           | 277   | 42    | 15,2  | 10,9   | 19,4  |                           |
| Italian Area                       |      |       |      |        |       |                           |       |       |       |        |       |                           |
| North                              | 409  | 88    | 21,7 | 13,7   | 29,8  | 0,1115                    | 421   | 74    | 17,6  | 10,3   | 25,0  | 0,8172                    |
| Center                             | 206  | 58    | 29,1 | 16,7   | 41,5  |                           | 208   | 40    | 19,5  | 8,6    | 30,3  |                           |
| South                              | 416  | 88    | 21,6 | 13,7   | 29,5  |                           | 430   | 82    | 19,3  | 11,9   | 26,8  |                           |
| Education                          |      |       |      |        |       |                           |       |       |       |        |       |                           |
| Primary and middle school          | 303  | 72    | 25,0 | 15,0   | 35,0  | 0,6559                    | 338   | 65    | 19,7  | 11,0   | 28,4  | 0,7492                    |
| High school and university         | 728  | 162   | 22,4 | 16,4   | 28,5  |                           | 720   | 131   | 18,3  | 12,7   | 23,9  |                           |
| Daily smoke - number of cigarettes |      |       |      |        |       |                           |       |       |       |        |       |                           |
|                                    | N    | Mean  | SD   | CI 95% |       | anova<br>p-value          | N     | Mean  | SD    | CI 95% |       | anova<br>p-value          |
| All                                | 234  | 13,29 | 8,85 | 12,75  | 13,83 |                           | 196   | 10,66 | 6,37  | 10,28  | 11,04 |                           |
| Age classes (years)                |      |       |      |        |       |                           |       |       |       |        |       |                           |
| 35-44                              | 72   | 12,3  | 8,4  | 11,3   | 13,4  | 0,0155                    | 49    | 8,2   | 5,7   | 7,5    | 8,9   | 0,0155                    |
| 45-54                              | 63   | 14,1  | 9,9  | 12,9   | 15,3  |                           | 48    | 12,0  | 7,3   | 11,1   | 12,8  |                           |
| 55-64                              | 54   | 11,6  | 6,6  | 10,8   | 12,4  |                           | 57    | 11,2  | 5,8   | 10,5   | 11,9  |                           |
| 65-74                              | 45   | 16,3  | 10,2 | 15,0   | 17,5  |                           | 42    | 11,4  | 5,9   | 10,7   | 12,1  |                           |
| Italian Area                       |      |       |      |        |       |                           |       |       |       |        |       |                           |
| North                              | 88   | 12,8  | 9,8  | 11,8   | 13,7  | 0,5733                    | 74    | 10,6  | 7,8   | 9,9    | 11,4  | 0,5733                    |
| Center                             | 58   | 12,3  | 7,5  | 11,2   | 13,3  |                           | 40    | 10,6  | 5,6   | 9,8    | 11,4  |                           |
| South                              | 88   | 14,6  | 8,6  | 13,7   | 15,4  |                           | 82    | 10,7  | 5,4   | 10,2   | 11,3  |                           |
| Education                          |      |       |      |        |       |                           |       |       |       |        |       |                           |
| Primary and middle school          | 72   | 16,6  | 10,0 | 15,5   | 17,7  | <0,0001                   | 65    | 12,8  | 7,0   | 12,0   | 13,5  | <0,0001                   |
| High school and university         | 162  | 11,9  | 7,9  | 11,3   | 12,4  |                           | 131   | 9,6   | 5,8   | 9,2    | 10,1  |                           |
| Former Smokers                     |      |       |      |        |       |                           |       |       |       |        |       |                           |
|                                    | N    | n     | %    | CI 95% |       | χ <sup>2</sup><br>p-value | N     | n     | %     | CI 95% |       | χ <sup>2</sup><br>p-value |
| All                                | 1031 | 351   | 43,0 | 36,9   | 49,0  |                           | 1059  | 246   | 27,8  | 22,4   | 33,2  |                           |
| Age classes (years)                |      |       |      |        |       |                           |       |       |       |        |       |                           |
| 35-44                              | 249  | 59    | 23,7 | 18,4   | 29,0  | <0.0001                   | 235   | 44    | 18,7  | 13,7   | 23,7  | <0.0001                   |
| 45-54                              | 248  | 68    | 27,4 | 21,9   | 33,0  |                           | 271   | 42    | 15,5  | 11,2   | 19,8  |                           |
| 55-64                              | 276  | 102   | 37,0 | 31,3   | 42,7  |                           | 276   | 77    | 27,9  | 22,6   | 33,2  |                           |
| 65-74                              | 258  | 122   | 47,3 | 41,2   | 53,4  |                           | 277   | 83    | 30,0  | 24,6   | 35,4  |                           |
| Italian Area                       |      |       |      |        |       |                           |       |       |       |        |       |                           |
| North                              | 409  | 130   | 39,9 | 30,3   | 49,4  | 0,0851                    | 421   | 105   | 29,7  | 21,0   | 38,5  | 0,0148                    |
| Center                             | 206  | 61    | 40,8 | 27,3   | 54,2  |                           | 208   | 59    | 34,1  | 21,1   | 47,1  |                           |
| South                              | 416  | 160   | 47,0 | 37,4   | 56,6  |                           | 430   | 82    | 22,8  | 14,9   | 30,8  |                           |
| Education                          |      |       |      |        |       |                           |       |       |       |        |       |                           |
| Primary and middle school          | 303  | 127   | 54,0 | 42,5   | 65,5  | 0,0001                    | 338   | 65    | 23,3  | 14,1   | 32,6  | 0,0458                    |
| High school and university         | 728  | 224   | 38,7 | 31,7   | 45,8  |                           | 720   | 181   | 29,7  | 23,1   | 36,3  |                           |
| Cigar Smokers                      |      |       |      |        |       |                           |       |       |       |        |       |                           |
|                                    | N    | n     | %    | CI 95% |       | χ <sup>2</sup><br>p-value | N     | n     | %     | CI 95% |       | χ <sup>2</sup><br>p-value |
| All                                | 1031 | 115   | 13,1 | 9,0    | 17,2  | <0,0001                   | 1059  | 10    | 1,13  | 0      | 2,41  | <0,0001                   |
| Pipe Smokers                       |      |       |      |        |       |                           |       |       |       |        |       |                           |
|                                    | N    | n     | %    | CI 95% |       | χ <sup>2</sup><br>p-value | N     | n     | %     | CI 95% |       | χ <sup>2</sup><br>p-value |
| All                                | 1031 | 68    | 7,5  | 4,3    | 10,7  | <0,0001                   | 1059  | 7     | 0,8   | 0,0    | 1,8   | <0,0001                   |
| Cigarette and Cigar Smokers        |      |       |      |        |       |                           |       |       |       |        |       |                           |
|                                    | N    | n     | %    | CI 95% |       | χ <sup>2</sup><br>p-value | N     | n     | %     | CI 95% |       | χ <sup>2</sup><br>p-value |
| All                                | 1031 | 38    | 3,7  | 1,4    | 6     | <0,0001                   | 1059  | 2     | 0,2   | 0      | 0,7   | <0,0001                   |
| Cigarette and Pipe Smokers         |      |       |      |        |       |                           |       |       |       |        |       |                           |
|                                    | N    | n     | %    | CI 95% |       | χ <sup>2</sup><br>p-value | N     | n     | %     | CI 95% |       | χ <sup>2</sup><br>p-value |
| All                                | 1031 | 24    | 2,3  | 0,5    | 4,1   | <0,0001                   | 1059  | 3     | 0,3   | 0      | 0,9   | <0,0001                   |

N: number of participants denominator.

n: number of participants related to the prevalence numerator.

Current smoker is defined as a person who smokes one or more cigarettes per day.

A former smoker is defined as a person who has quit smoking for at least 12 months.

Number of cigarettes refers to packaged, handmade or electronic cigarettes.

SD: standard deviation; CI: confidence interval.

Means, standard deviations, and prevalence were age standardized by European standard population distribution 2013 (except when they are reported by age-classes).

Anova to compare mean values among classes; chi-square test to compare prevalence among classes.

Pool of the following Italian regions: Piedmont, Lombardy, Liguria, Emilia Romagna, Tuscany, Lazio, Abruzzo, Basilicata, Calabria, and Sicily.

Italian Area: North (Piedmont, Lombardy, Liguria, Emilia Romagna); Center (Tuscany, Lazio); South (Abruzzo, Basilicata, Calabria, Sicily).

**Table S.15. Age-standardized (European standard population) sedentariness during leisure time and at work prevalence by sex, age classes, geographical area and educational level.**  
**Men and women residing in Italy aged 35-74 years, Health Examination Survey 2018-2019 - CUORE Project.**

|                                               | Men  |     |      |        |      |                     | Women |     |      |        |      |                     |
|-----------------------------------------------|------|-----|------|--------|------|---------------------|-------|-----|------|--------|------|---------------------|
| Sedentariness during leisure time             |      |     |      |        |      |                     |       |     |      |        |      |                     |
|                                               | N    | n   | %    | CI 95% |      | $\chi^2$<br>p-value | N     | n   | %    | CI 95% |      | $\chi^2$<br>p-value |
| All                                           | 1035 | 335 | 33,3 | 27,5   | 39,0 |                     | 1071  | 474 | 44,5 | 38,6   | 50,5 |                     |
| Age classes (years)                           |      |     |      |        |      |                     |       |     |      |        |      |                     |
| 35-44                                         | 249  | 92  | 37,0 | 31,0   | 42,9 | <0.0001             | 238   | 102 | 42,9 | 36,6   | 49,1 | 0,6034              |
| 45-54                                         | 249  | 101 | 40,6 | 34,5   | 46,7 |                     | 272   | 130 | 47,8 | 41,9   | 53,7 |                     |
| 55-64                                         | 277  | 84  | 30,3 | 24,9   | 35,7 |                     | 282   | 124 | 44,0 | 38,2   | 49,8 |                     |
| 65-74                                         | 260  | 58  | 22,3 | 17,3   | 27,4 |                     | 279   | 118 | 42,3 | 36,5   | 48,1 |                     |
| Italian Area                                  |      |     |      |        |      |                     |       |     |      |        |      |                     |
| North                                         | 410  | 124 | 30,8 | 21,9   | 39,8 | 0,1783              | 426   | 155 | 36,8 | 27,6   | 46,0 | <0.0001             |
| Center                                        | 207  | 62  | 30,8 | 18,2   | 43,4 |                     | 213   | 91  | 42,8 | 29,4   | 56,2 |                     |
| South                                         | 418  | 149 | 36,9 | 27,7   | 46,2 |                     | 432   | 228 | 53,0 | 43,6   | 62,5 |                     |
| Education                                     |      |     |      |        |      |                     |       |     |      |        |      |                     |
| Primary and middle school                     | 304  | 115 | 39,3 | 28,1   | 50,5 | <0.0001             | 341   | 182 | 53,5 | 42,6   | 64,4 | 0,5837              |
| High school and university                    | 728  | 220 | 30,9 | 24,3   | 37,6 |                     | 728   | 291 | 40,5 | 33,5   | 47,6 |                     |
| Sedentariness at work                         |      |     |      |        |      |                     |       |     |      |        |      |                     |
|                                               | N    | n   | %    | CI 95% |      | $\chi^2$<br>p-value | N     | n   | %    | CI 95% |      | $\chi^2$<br>p-value |
| All                                           | 767  | 332 | 45,0 | 38,1   | 51,9 |                     | 833,0 | 290 | 47,0 | 40,3   | 53,6 |                     |
| Age classes (years)                           |      |     |      |        |      |                     |       |     |      |        |      |                     |
| 35-44                                         | 240  | 89  | 38,4 | 26,6   | 50,1 | 0,0125              | 231   | 92  | 47,4 | 35,1   | 59,7 | 0,9172              |
| 45-54                                         | 244  | 104 | 44,1 | 32,2   | 56,0 |                     | 265   | 94  | 45,2 | 33,7   | 56,7 |                     |
| 55-64                                         | 227  | 117 | 53,7 | 40,5   | 66,8 |                     | 244   | 92  | 48,7 | 36,0   | 61,4 |                     |
| 65-74                                         | 56   | 22  | 46,8 | 17,7   | 75,9 |                     | 93    | 12  | 46,2 | 23,4   | 68,9 |                     |
| Italian Area                                  |      |     |      |        |      |                     |       |     |      |        |      |                     |
| North                                         | 315  | 140 | 45,5 | 34,7   | 56,3 | 0,6505              | 314   | 128 | 50,7 | 39,9   | 61,6 | 0,0557              |
| Center                                        | 159  | 73  | 47,2 | 31,9   | 62,4 |                     | 166   | 66  | 51,1 | 36,0   | 66,2 |                     |
| South                                         | 293  | 119 | 43,2 | 32,1   | 54,3 |                     | 353   | 96  | 40,6 | 30,5   | 50,7 |                     |
| Education                                     |      |     |      |        |      |                     |       |     |      |        |      |                     |
| Primary and middle school                     | 175  | 31  | 18,9 | 7,4    | 30,4 | <0.0001             | 231   | 25  | 20,9 | 10,3   | 31,4 | <0.0001             |
| High school and university                    | 589  | 301 | 52,3 | 44,4   | 60,2 |                     | 600   | 265 | 53,1 | 45,3   | 60,9 |                     |
| Sedentariness during leisure time and at work |      |     |      |        |      |                     |       |     |      |        |      |                     |
|                                               | N    | n   | %    | CI 95% |      | $\chi^2$<br>p-value | N     | n   | %    | CI 95% |      | $\chi^2$<br>p-value |
| All                                           | 752  | 114 | 15,3 | 10,3   | 20,3 |                     | 734   | 132 | 18,2 | 13,0   | 23,4 |                     |
| Age classes (years)                           |      |     |      |        |      |                     |       |     |      |        |      |                     |
| 35-44                                         | 234  | 30  | 12,8 | 4,7    | 20,9 | 0,0412              | 213   | 41  | 19,3 | 9,5    | 29,0 | 0,0940              |
| 45-54                                         | 241  | 47  | 19,5 | 10,0   | 29,0 |                     | 237   | 44  | 18,6 | 9,6    | 27,5 |                     |
| 55-64                                         | 224  | 34  | 15,2 | 5,7    | 24,6 |                     | 221   | 43  | 19,5 | 9,4    | 29,5 |                     |
| 65-74                                         | 53   | 3   | 5,7  | 0,0    | 19,1 |                     | 63    | 4   | 6,4  | 0,0    | 17,4 |                     |
| Italian Area                                  |      |     |      |        |      |                     |       |     |      |        |      |                     |
| North                                         | 312  | 41  | 13,4 | 6,0    | 20,7 | 0,3834              | 296   | 49  | 17,0 | 8,8    | 25,1 | 0,7056              |
| Center                                        | 155  | 24  | 15,5 | 4,4    | 26,5 |                     | 151   | 29  | 19,5 | 7,6    | 31,5 |                     |
| South                                         | 285  | 49  | 17,4 | 8,9    | 25,9 |                     | 287   | 54  | 18,8 | 10,8   | 26,8 |                     |
| Education                                     |      |     |      |        |      |                     |       |     |      |        |      |                     |
| Primary and middle school                     | 169  | 14  | 8,2  | 0,2    | 16,3 | 0,0068              | 172   | 15  | 8,9  | 1,5    | 16,3 | 0,0005              |
| High school and university                    | 583  | 100 | 17,4 | 11,4   | 23,4 |                     | 562   | 117 | 20,9 | 14,6   | 27,3 |                     |

N: number of participants denominator.

n: number of participants related to the prevalence numerator.

Sedentariness during leisure time is defined as someone who usually carries out activities such as reading, watching television, getting to the movies or spend leisure time in other sedentary activities.

Sedentariness at work is defined as one whose work mainly involves sitting at a desk and generally without the need to walk.

SD: standard deviation; CI: confidence interval.

Prevalence was age standardized by European standard population distribution 2013 (except when it is reported by age-classes).

Chi-square test to compare prevalence among classes.

Pool of the following Italian regions: Piedmont, Lombardy, Liguria, Emilia Romagna, Tuscany, Lazio, Abruzzo, Basilicata, Calabria, and Sicily.

Italian Area: North (Piedmont, Lombardy, Liguria, Emilia Romagna); Center (Tuscany, Lazio); South (Abruzzo, Basilicata, Calabria, Sicily).

**Table S.16. Age-standardized (European standard population) balanced nutrition food groups intake (EPIC questionnaire): vegetables, fruit, fish and cheese prevalence by sex, age classes, geographical area and educational level.**

**Men and women residing in Italy aged 35-74 years, Health Examination Survey 2018-2019 - CUORE Project.**

|                            | Men |     |      |       |                     |        | Women |     |      |       |                     |        |
|----------------------------|-----|-----|------|-------|---------------------|--------|-------|-----|------|-------|---------------------|--------|
| Vegetables                 |     |     |      |       |                     |        |       |     |      |       |                     |        |
|                            | N   | n   | %    | CI95% | $\chi^2$<br>p-value |        | N     | n   | %    | CI95% | $\chi^2$<br>p-value |        |
| All                        | 793 | 222 | 28.1 | 21.9  | 34.4                |        | 785   | 302 | 39.0 | 32.2  | 45.8                |        |
| Age classes (years)        |     |     |      |       |                     |        |       |     |      |       |                     |        |
| 35-44                      | 196 | 51  | 26.0 | 19.9  | 32.2                | 0.4916 | 191   | 86  | 45.0 | 38.0  | 52.1                | 0.0301 |
| 45-54                      | 204 | 61  | 29.9 | 23.6  | 36.2                |        | 216   | 90  | 41.7 | 35.1  | 48.2                |        |
| 55-64                      | 219 | 67  | 30.6 | 24.5  | 36.7                |        | 214   | 74  | 34.6 | 28.2  | 41.0                |        |
| 65-74                      | 174 | 43  | 24.7 | 18.3  | 31.1                |        | 164   | 52  | 31.7 | 24.6  | 38.8                |        |
| Italian Area               |     |     |      |       |                     |        |       |     |      |       |                     |        |
| North                      | 357 | 97  | 27.2 | 18.0  | 36.5                | 0.2484 | 359   | 140 | 39.6 | 29.5  | 49.7                | 0.2616 |
| Center                     | 180 | 59  | 32.7 | 19.0  | 46.5                |        | 184   | 78  | 43.4 | 29.0  | 57.8                |        |
| South                      | 256 | 66  | 26.1 | 15.4  | 36.9                |        | 242   | 84  | 34.8 | 22.9  | 46.7                |        |
| Education                  |     |     |      |       |                     |        |       |     |      |       |                     |        |
| Primary and middle school  | 201 | 50  | 24.7 | 12.6  | 36.8                | 0.2883 | 209   | 68  | 33.0 | 20.0  | 45.9                | 0.0463 |
| High school and university | 591 | 172 | 29.3 | 22.0  | 36.6                |        | 575   | 234 | 41.1 | 33.2  | 49.1                |        |
| Fruit                      |     |     |      |       |                     |        |       |     |      |       |                     |        |
|                            | N   | n   | %    | CI95% | $\chi^2$<br>p-value |        | N     | n   | %    | CI95% | $\chi^2$<br>p-value |        |
| All                        | 793 | 394 | 49.7 | 42.7  | 56.6                |        | 785   | 411 | 52.3 | 45.3  | 59.2                |        |
| Age classes (years)        |     |     |      |       |                     |        |       |     |      |       |                     |        |
| 35-44                      | 196 | 96  | 49.0 | 42.0  | 56.0                | 0.6598 | 191   | 98  | 51.3 | 44.2  | 58.4                | 0.9483 |
| 45-54                      | 204 | 106 | 52.0 | 45.1  | 58.8                |        | 216   | 111 | 51.4 | 44.7  | 58.1                |        |
| 55-64                      | 219 | 102 | 46.6 | 40.0  | 53.2                |        | 214   | 115 | 53.7 | 47.1  | 60.4                |        |
| 65-74                      | 174 | 90  | 51.7 | 44.3  | 59.2                |        | 164   | 87  | 53.1 | 45.4  | 60.7                |        |
| Italian Area               |     |     |      |       |                     |        |       |     |      |       |                     |        |
| North                      | 357 | 179 | 50.0 | 39.6  | 60.4                | 0.2694 | 359   | 196 | 55.4 | 45.1  | 65.7                | 0.4259 |
| Center                     | 180 | 97  | 53.6 | 39.0  | 68.2                |        | 184   | 96  | 51.4 | 36.9  | 65.9                |        |
| South                      | 256 | 118 | 46.5 | 34.3  | 58.7                |        | 242   | 119 | 48.4 | 35.9  | 60.9                |        |
| Education                  |     |     |      |       |                     |        |       |     |      |       |                     |        |
| Primary and middle school  | 201 | 104 | 51.5 | 37.4  | 65.5                | 0.5390 | 209   | 111 | 53.2 | 39.4  | 67.0                | 0.8798 |
| High school and university | 591 | 289 | 49.0 | 41.0  | 57.0                |        | 575   | 300 | 52.1 | 44.0  | 60.1                |        |
| Vegetable and Fruit        |     |     |      |       |                     |        |       |     |      |       |                     |        |
|                            | N   | n   | %    | CI95% | $\chi^2$<br>p-value |        | N     | n   | %    | CI95% | $\chi^2$<br>p-value |        |
| All                        | 793 | 104 | 13.3 | 8.6   | 18.1                |        | 785   | 154 | 19.9 | 14.3  | 25.4                |        |
| Age classes (years)        |     |     |      |       |                     |        |       |     |      |       |                     |        |
| 35-44                      | 196 | 26  | 13.3 | 4.2   | 22.4                | 0.2520 | 191   | 39  | 20.4 | 9.5   | 31.4                | 0.3179 |
| 45-54                      | 204 | 34  | 16.7 | 6.9   | 26.5                |        | 216   | 50  | 23.2 | 12.4  | 33.9                |        |
| 55-64                      | 219 | 27  | 12.3 | 3.5   | 21.1                |        | 214   | 39  | 18.2 | 7.8   | 28.7                |        |
| 65-74                      | 174 | 17  | 9.8  | 0.0   | 19.5                |        | 164   | 26  | 15.9 | 3.5   | 28.2                |        |
| Italian Area               |     |     |      |       |                     |        |       |     |      |       |                     |        |
| North                      | 357 | 50  | 14.1 | 6.9   | 21.3                | 0.0678 | 359   | 82  | 23.4 | 14.7  | 32.2                | 0.1014 |
| Center                     | 180 | 30  | 16.9 | 5.9   | 27.9                |        | 184   | 33  | 18.2 | 7.0   | 29.4                |        |
| South                      | 256 | 24  | 9.9  | 2.6   | 17.1                |        | 242   | 39  | 16.0 | 6.8   | 25.1                |        |
| Education                  |     |     |      |       |                     |        |       |     |      |       |                     |        |
| Primary and middle school  | 201 | 22  | 10.9 | 2.2   | 19.7                | 0.3465 | 209   | 35  | 17.3 | 6.9   | 27.7                | 0.2589 |
| High school and university | 591 | 82  | 14.2 | 8.6   | 19.7                |        | 575   | 119 | 20.8 | 14.2  | 27.4                |        |
| Fish                       |     |     |      |       |                     |        |       |     |      |       |                     |        |
|                            | N   | n   | %    | CI95% | $\chi^2$<br>p-value |        | N     | n   | %    | CI95% | $\chi^2$<br>p-value |        |
| All                        | 793 | 350 | 44.4 | 37.5  | 51.3                |        | 785   | 319 | 40.5 | 33.6  | 47.3                |        |
| Age classes (years)        |     |     |      |       |                     |        |       |     |      |       |                     |        |
| 35-44                      | 196 | 93  | 47.5 | 40.5  | 54.4                | 0.4272 | 191   | 77  | 40.3 | 33.4  | 47.3                | 0.6847 |
| 45-54                      | 204 | 90  | 44.1 | 37.3  | 50.9                |        | 216   | 81  | 37.5 | 31.0  | 44.0                |        |
| 55-64                      | 219 | 99  | 45.2 | 38.6  | 51.8                |        | 214   | 91  | 42.5 | 35.9  | 49.2                |        |
| 65-74                      | 174 | 68  | 39.1 | 31.8  | 46.3                |        | 164   | 70  | 42.7 | 35.1  | 50.3                |        |
| Italian Area               |     |     |      |       |                     |        |       |     |      |       |                     |        |
| North                      | 357 | 165 | 46.9 | 36.6  | 57.2                | 0.5635 | 359   | 144 | 39.4 | 29.3  | 49.5                | 0.8432 |
| Center                     | 180 | 76  | 42.0 | 27.5  | 56.4                |        | 184   | 73  | 39.8 | 25.6  | 54.1                |        |
| South                      | 256 | 109 | 42.7 | 30.6  | 54.7                |        | 242   | 102 | 42.4 | 30.1  | 54.8                |        |
| Education                  |     |     |      |       |                     |        |       |     |      |       |                     |        |
| Primary and middle school  | 201 | 79  | 40.0 | 26.3  | 53.8                | 0.1252 | 209   | 84  | 39.7 | 26.2  | 53.2                | 0.9293 |
| High school and university | 591 | 271 | 45.9 | 37.9  | 53.9                |        | 575   | 235 | 40.8 | 32.9  | 48.8                |        |
| Cheese                     |     |     |      |       |                     |        |       |     |      |       |                     |        |
|                            | N   | n   | %    | CI95% | $\chi^2$<br>p-value |        | N     | n   | %    | CI95% | $\chi^2$<br>p-value |        |
| All                        | 793 | 355 | 44.7 | 37.8  | 51.6                |        | 785   | 421 | 53.5 | 46.6  | 60.5                |        |
| Age classes (years)        |     |     |      |       |                     |        |       |     |      |       |                     |        |
| 35-44                      | 196 | 90  | 45.9 | 38.9  | 52.9                | 0.7559 | 191   | 96  | 50.3 | 43.2  | 57.4                | 0.7558 |
| 45-54                      | 204 | 85  | 41.7 | 34.9  | 48.4                |        | 216   | 119 | 55.1 | 48.5  | 61.7                |        |
| 55-64                      | 219 | 102 | 46.6 | 40.0  | 53.2                |        | 214   | 116 | 54.2 | 47.5  | 60.9                |        |
| 65-74                      | 174 | 78  | 44.8 | 37.4  | 52.2                |        | 164   | 90  | 54.9 | 47.3  | 62.5                |        |
| Italian Area               |     |     |      |       |                     |        |       |     |      |       |                     |        |
| North                      | 357 | 149 | 41.8 | 31.6  | 52.0                | 0.2765 | 359   | 189 | 52.9 | 42.6  | 63.2                | 0.6255 |
| Center                     | 180 | 83  | 45.7 | 31.1  | 60.3                |        | 184   | 96  | 51.7 | 37.2  | 66.2                |        |
| South                      | 256 | 123 | 48.0 | 35.8  | 60.2                |        | 242   | 136 | 55.9 | 43.5  | 68.3                |        |
| Education                  |     |     |      |       |                     |        |       |     |      |       |                     |        |
| Primary and middle school  | 201 | 87  | 43.3 | 29.3  | 57.2                | 0.7006 | 209   | 123 | 58.7 | 45.1  | 72.3                | 0.0962 |
| High school and university | 591 | 267 | 45.1 | 37.1  | 53.0                |        | 575   | 298 | 51.9 | 43.8  | 60.0                |        |

N: number of participants denominator.

n: number of participants related to the prevalence numerator.

For vegetables intake, the following foods were considered: leafy vegetables-cooked, leafy vegetables-raw, other vegetables, tomatoes-raw, tomatoes-cooked, root vegetables, cabbages, mushrooms, grain and pod vegetables, onion, garlic, stalk vegetables, mixed salad, mixed vegetables.

For vegetables intake were considered the following foods: leafy vegetable-cooked, leafy vegetable-raw, other vegetables, tomatoes-raw, tomatoes-cooked, root vegetables, cabbages, mushrooms, grain and pod vegetables, onion, garlic, stalk vegetables, mixed salad, mixed vegetables.

For fruits intake, the following foods were considered: citrus fruits and other fruits.

For fish intake, the following foods were considered: fish, crustaceans and molluscs.

For cheese intake, the following foods were considered: cheeses (including fresh cheeses).

Dietary information was collected by the self-administered Italian version of the food frequency questionnaire (FFQ) of the European Prospective Investigation into Cancer (EPIC).

A balanced nutrition was defined based on the following intake: vegetables  $\geq 200$  g/day; fruit 150-375 g/day; fish at least twice per week (150 g per serving); cheese no more than three times per week (50-100 g per serving); sausages, salami and other preserved meat no more than once per week (50 g per serving); cake and desserts no more than once per week (100 g per serving); sugar beverages less than one per week (330 ml); and consumption of alcoholic beverages limited to two glasses per day for men (24 g of ethanol), one glass per day for women (12 g of ethanol) and one glass per day for men and women aged 65-74 (12 g of ethanol).

SD: standard deviation; CI: confidence interval.

Prevalence was age standardized by European standard population distribution 2013 (except when it is reported by age-classes).

Chi-square test to compare prevalence among classes.



Pool of the following Italian regions: Piedmont, Lombardy, Liguria, Emilia Romagna, Tuscany, Lazio, Basilicata, Calabria, and Sicily.

Italian Area: North (Piedmont, Lombardy, Liguria, Emilia Romagna); Center (Tuscany, Lazio); South (Basilicata, Calabria, Sicily).

**Table S.17. Age-standardized (European standard population) balanced nutrition food groups intake (EPIC questionnaire): processed meat, sweets/cakes, sweet drinks and alcohol prevalence by sex, age classes, geographical area and educational level.**

**Men and women residing in Italy aged 35-74 years, Health Examination Survey 2018-2019 - CUORE Project.**

|                            | Men |     |      |        |                     |         | Women |     |      |        |                     |         |
|----------------------------|-----|-----|------|--------|---------------------|---------|-------|-----|------|--------|---------------------|---------|
| Processed meat             |     |     |      |        |                     |         |       |     |      |        |                     |         |
|                            | N   | n   | %    | CI 95% | $\chi^2$<br>p-value |         | N     | n   | %    | CI 95% | $\chi^2$<br>p-value |         |
| All                        | 793 | 91  | 11,1 | 6,8    | 15,5                |         | 785   | 168 | 20,7 | 15,0   | 26,3                |         |
| Age classes (years)        |     |     |      |        |                     |         |       |     |      |        |                     |         |
| 35-44                      | 196 | 12  | 6,1  | 2,8    | 9,5                 | 0,0146  | 191   | 28  | 14,7 | 9,6    | 19,7                | <0,0001 |
| 45-54                      | 204 | 21  | 10,3 | 6,1    | 14,5                |         | 216   | 35  | 16,2 | 11,3   | 21,1                |         |
| 55-64                      | 219 | 30  | 13,7 | 9,1    | 18,3                |         | 214   | 52  | 24,3 | 18,6   | 30,1                |         |
| 65-74                      | 174 | 28  | 16,1 | 10,6   | 21,6                |         | 164   | 53  | 32,3 | 25,2   | 39,5                |         |
| Italian Area               |     |     |      |        |                     |         |       |     |      |        |                     |         |
| North                      | 357 | 37  | 10,1 | 3,9    | 16,3                | 0,1479  | 359   | 83  | 22,1 | 13,6   | 30,7                | 0,4115  |
| Center                     | 180 | 28  | 15,1 | 4,6    | 25,6                |         | 184   | 40  | 21,4 | 9,5    | 33,3                |         |
| South                      | 256 | 26  | 9,8  | 2,6    | 17,1                |         | 242   | 45  | 18,1 | 8,5    | 27,7                |         |
| Education                  |     |     |      |        |                     |         |       |     |      |        |                     |         |
| Primary and middle school  | 201 | 16  | 7,6  | 0,2    | 15,1                | 0,0913  | 209   | 54  | 24,5 | 12,6   | 36,4                | 0,0863  |
| High school and university | 591 | 75  | 12,3 | 7,0    | 17,6                |         | 575   | 114 | 19,4 | 13,0   | 25,8                |         |
| Sweets/Cakes               |     |     |      |        |                     |         |       |     |      |        |                     |         |
|                            | N   | n   | %    | CI 95% | $\chi^2$<br>p-value |         | N     | n   | %    | CI 95% | $\chi^2$<br>p-value |         |
| All                        | 793 | 74  | 9,0  | 5,0    | 13,0                |         | 785   | 87  | 10,7 | 6,4    | 15,0                |         |
| Age classes (years)        |     |     |      |        |                     |         |       |     |      |        |                     |         |
| 35-44                      | 196 | 11  | 5,6  | 2,4    | 8,8                 | 0,0195  | 191   | 12  | 6,3  | 2,8    | 9,7                 | 0,0051  |
| 45-54                      | 204 | 14  | 6,9  | 3,4    | 10,3                |         | 216   | 18  | 8,3  | 4,7    | 12,0                |         |
| 55-64                      | 219 | 25  | 11,4 | 7,2    | 15,6                |         | 214   | 30  | 14,0 | 9,4    | 18,7                |         |
| 65-74                      | 174 | 24  | 13,8 | 8,7    | 18,9                |         | 164   | 27  | 16,5 | 10,8   | 22,1                |         |
| Italian Area               |     |     |      |        |                     |         |       |     |      |        |                     |         |
| North                      | 357 | 29  | 8,0  | 2,4    | 13,6                | 0,1003  | 359   | 37  | 9,8  | 3,7    | 15,9                | 0,2929  |
| Center                     | 180 | 13  | 6,9  | 0,0    | 14,3                |         | 184   | 17  | 8,7  | 0,5    | 16,9                |         |
| South                      | 256 | 32  | 11,9 | 4,0    | 19,8                |         | 242   | 33  | 13,5 | 5,0    | 22,0                |         |
| Education                  |     |     |      |        |                     |         |       |     |      |        |                     |         |
| Primary and middle school  | 201 | 14  | 6,9  | 0,0    | 14,0                | 0,2298  | 209   | 26  | 11,8 | 2,9    | 20,7                | 0,5529  |
| High school and university | 591 | 60  | 9,7  | 0,0    | 14,5                |         | 575   | 61  | 10,3 | 5,4    | 15,2                |         |
| Sweet Drinks               |     |     |      |        |                     |         |       |     |      |        |                     |         |
|                            | N   | n   | %    | CI 95% | $\chi^2$<br>p-value |         | N     | n   | %    | CI 95% | $\chi^2$<br>p-value |         |
| All                        | 793 | 432 | 53,8 | 46,8   | 60,7                |         | 785   | 473 | 59,3 | 52,4   | 66,1                |         |
| Age classes (years)        |     |     |      |        |                     |         |       |     |      |        |                     |         |
| 35-44                      | 196 | 81  | 41,3 | 34,4   | 48,2                | <0,0001 | 191   | 87  | 45,6 | 38,5   | 52,6                | <0,0001 |
| 45-54                      | 204 | 108 | 52,9 | 46,1   | 59,8                |         | 216   | 123 | 56,9 | 50,3   | 63,6                |         |
| 55-64                      | 219 | 133 | 60,7 | 54,3   | 67,2                |         | 214   | 141 | 65,9 | 59,5   | 72,2                |         |
| 65-74                      | 174 | 110 | 63,2 | 56,1   | 70,4                |         | 164   | 122 | 74,4 | 67,7   | 81,1                |         |
| Italian Area               |     |     |      |        |                     |         |       |     |      |        |                     |         |
| North                      | 357 | 194 | 53,6 | 43,3   | 64,0                | 0,8149  | 359   | 216 | 59,1 | 48,9   | 69,2                | 0,8341  |
| Center                     | 180 | 95  | 52,3 | 37,7   | 67,0                |         | 184   | 108 | 57,6 | 43,2   | 71,9                |         |
| South                      | 256 | 143 | 54,9 | 42,8   | 67,1                |         | 242   | 149 | 60,9 | 48,7   | 73,1                |         |
| Education                  |     |     |      |        |                     |         |       |     |      |        |                     |         |
| Primary and middle school  | 201 |     | 51,4 | 37,4   | 65,5                | 0,6365  | 209   |     | 61,7 | 48,3   | 75,1                | 0,4669  |
| High school and university | 591 |     | 54,4 | 46,5   | 62,4                |         | 575   |     | 58,6 | 50,6   | 66,5                |         |
| Alcohol                    |     |     |      |        |                     |         |       |     |      |        |                     |         |
|                            | N   | n   | %    | CI 95% | $\chi^2$<br>p-value |         | N     | n   | %    | CI 95% | $\chi^2$<br>p-value |         |
| All                        | 793 | 581 | 74,2 | 68,1   | 80,3                |         | 785   | 662 | 84,4 | 79,4   | 89,5                |         |
| Age classes (years)        |     |     |      |        |                     |         |       |     |      |        |                     |         |
| 35-44                      | 196 | 162 | 82,7 | 72,5   | 92,8                | <0,0001 | 191   | 165 | 86,4 | 77,1   | 95,7                | 0,824   |
| 45-54                      | 204 | 155 | 76,0 | 64,8   | 87,2                |         | 216   | 182 | 84,3 | 75,0   | 93,6                |         |
| 55-64                      | 219 | 167 | 76,3 | 64,9   | 87,7                |         | 214   | 178 | 83,2 | 73,0   | 93,3                |         |
| 65-74                      | 174 | 97  | 55,8 | 39,4   | 72,1                |         | 164   | 137 | 83,5 | 71,0   | 96,1                |         |
| Italian Area               |     |     |      |        |                     |         |       |     |      |        |                     |         |
| North                      | 357 | 248 | 70,4 | 61,0   | 79,9                | 0,0438  | 359   | 292 | 81,6 | 73,6   | 89,6                | 0,0198  |
| Center                     | 180 | 143 | 80,4 | 68,8   | 92,1                |         | 184   | 153 | 83,0 | 72,0   | 93,9                |         |
| South                      | 256 | 190 | 75,2 | 64,6   | 85,7                |         | 242   | 217 | 89,6 | 82,0   | 97,3                |         |
| Education                  |     |     |      |        |                     |         |       |     |      |        |                     |         |
| Primary and middle school  | 201 | 132 | 66,5 | 53,3   | 79,8                | 0,0058  | 209   | 182 | 86,7 | 77,3   | 96,0                | 0,2401  |
| High school and university | 591 | 449 | 76,9 | 70,1   | 83,6                |         | 575   | 479 | 83,6 | 77,6   | 89,6                |         |

N: number of participants denominator.

n: number of participants related to the prevalence numerator.

For processed meat intake, the following foods were considered: sausages, salami and other preserved meat.

For sweets/cakes intake, the following foods were considered: sugar, honey, jam, chocolate, candy bars, paste, confetti/flakes, confectionery non chocolate, ice cream, cakes, pies, pastries, puddings (not milk based), dry cakes, biscuits.

For sweet beverages intake, the following foods were considered: fruit and vegetable juices, carbonated/soft/isotonic drinks, diluted syrups.

For alcohol intake, the following foods were considered: alcoholic beverages.

Dietary information was collected by the self-administered Italian version of the food frequency questionnaire (FFQ) of the European Prospective Investigation into Cancer (EPIC).

A balanced nutrition was defined based on the following intake: vegetables  $\geq 200$  g/day; fruit 150-375 g/day; fish at least twice per week (150 g per serving); cheese no more than three times per week (50-100 g per serving); sausages, salami and other preserved meat no more than once per week (50 g per serving); cake and desserts no more than once per week (100 g per serving); sugar beverages less than one per week (330 ml); and consumption of alcoholic beverages limited to two glasses per day for men (24 g of ethanol), one glass per day for women (12 g of ethanol) and one glass per day for men and women aged 65-74 (12 g of ethanol).

SD: standard deviation; CI: confidence interval.

Prevalence was age standardized by European standard population distribution 2013 (except when it is reported by age-classes).

Chi-square test to compare prevalence among classes.

Pool of the following Italian regions: Piedmont, Lombardy, Liguria, Emilia Romagna, Tuscany, Lazio, Basilicata, Calabria, and Sicily.  
Italian Area: North (Piedmont, Lombardy, Liguria, Emilia Romagna); Center (Tuscany, Lazio); South (Basilicata, Calabria, Sicily).

**Table S.18. Age-standardized (European standard population) food group intake (EPIC questionnaire): vegetables, fruit, fish and cheese mean by sex, age classes, geographical area and educational level.**  
**Men and women residing in Italy aged 35-74 years, Health Examination Survey 2018-2019 - CUORE Project.**

|                             |     | Men               |       |       |               |         | Women             |       |       |       |               |         |  |
|-----------------------------|-----|-------------------|-------|-------|---------------|---------|-------------------|-------|-------|-------|---------------|---------|--|
|                             |     | Vegetable (g/day) |       |       |               |         | Vegetable (g/day) |       |       |       |               |         |  |
|                             | N   | Mean              | SD    | CI95% | anova p-value |         | N                 | Mean  | SD    | CI95% | anova p-value |         |  |
| All                         | 793 | 167.9             | 93.2  | 161.4 | 174.4         |         | 785               | 184.9 | 96.8  | 178.2 | 191.7         |         |  |
| Age classes (years)         |     |                   |       |       |               |         |                   |       |       |       |               |         |  |
| 35-44                       | 196 | 163.1             | 84.2  | 151.3 | 174.9         | 0.0031  | 191               | 202.1 | 104.2 | 187.3 | 216.9         | 0.0031  |  |
| 45-54                       | 204 | 179.4             | 106.0 | 164.9 | 194.0         |         | 216               | 188.3 | 90.5  | 176.2 | 200.4         |         |  |
| 55-64                       | 219 | 169.2             | 91.3  | 157.1 | 181.3         |         | 214               | 175.7 | 91.5  | 163.5 | 188.0         |         |  |
| 65-74                       | 174 | 155.3             | 86.0  | 142.6 | 168.1         |         | 164               | 166.6 | 99.9  | 151.3 | 181.9         |         |  |
| Italian Area                |     |                   |       |       |               |         |                   |       |       |       |               |         |  |
| North                       | 357 | 166.8             | 91.7  | 157.3 | 176.3         | 0.0010  | 359               | 184.3 | 100.3 | 174.0 | 194.8         | 0.0010  |  |
| Center                      | 180 | 182.2             | 88.4  | 169.3 | 195.1         |         | 184               | 200.2 | 98.2  | 186.0 | 214.4         |         |  |
| South                       | 256 | 159.6             | 97.5  | 147.6 | 171.5         |         | 242               | 174.4 | 89.2  | 163.2 | 185.7         |         |  |
| Education                   |     |                   |       |       |               |         |                   |       |       |       |               |         |  |
| Primary and middle school   | 201 | 156.1             | 79.6  | 145.1 | 167.1         | <0.0001 | 209               | 163.3 | 85.9  | 151.6 | 174.9         | <0.0001 |  |
| High school and university  | 591 | 172.0             | 96.9  | 164.2 | 179.8         |         | 575               | 192.4 | 99.4  | 184.3 | 200.5         |         |  |
| Fruit (g/day)               |     |                   |       |       |               |         |                   |       |       |       |               |         |  |
|                             | N   | Mean              | SD    | CI95% | anova p-value |         | N                 | Mean  | SD    | CI95% | anova p-value |         |  |
| All                         | 793 | 267.9             | 174.9 | 255.7 | 280.1         |         | 785               | 275.7 | 164.4 | 264.2 | 287.2         |         |  |
| Age classes (years)         |     |                   |       |       |               |         |                   |       |       |       |               |         |  |
| 35-44                       | 196 | 243.9             | 175.1 | 219.3 | 268.4         | 0.0013  | 191               | 270.6 | 145.2 | 250.0 | 291.2         | 0.0013  |  |
| 45-54                       | 204 | 257.3             | 165.5 | 234.6 | 280.0         |         | 216               | 255.5 | 164.2 | 233.6 | 277.4         |         |  |
| 55-64                       | 219 | 290.1             | 183.2 | 265.8 | 314.4         |         | 214               | 294.2 | 166.7 | 271.9 | 316.5         |         |  |
| 65-74                       | 174 | 287.2             | 171.7 | 261.7 | 312.7         |         | 164               | 290.3 | 185.3 | 262.0 | 318.7         |         |  |
| Italian Area                |     |                   |       |       |               |         |                   |       |       |       |               |         |  |
| North                       | 357 | 255.4             | 168.6 | 237.9 | 272.9         | 0.4007  | 359               | 276.1 | 162.3 | 259.3 | 292.9         | 0.4007  |  |
| Center                      | 180 | 264.2             | 170.4 | 239.3 | 289.1         |         | 184               | 295.5 | 172.4 | 270.6 | 320.4         |         |  |
| South                       | 256 | 287.7             | 185.2 | 265.0 | 310.4         |         | 242               | 260.4 | 160.6 | 240.2 | 280.7         |         |  |
| Education                   |     |                   |       |       |               |         |                   |       |       |       |               |         |  |
| Primary and middle school   | 201 | 272.8             | 172.7 | 248.9 | 296.7         | 0.9245  | 209               | 268.6 | 157.2 | 247.3 | 289.9         | 0.9245  |  |
| High school and university  | 591 | 266.4             | 175.9 | 252.2 | 280.6         |         | 575               | 277.9 | 167.0 | 264.2 | 291.5         |         |  |
| Vegetable and Fruit (g/day) |     |                   |       |       |               |         |                   |       |       |       |               |         |  |
|                             | N   | Mean              | SD    | CI95% | anova p-value |         | N                 | Mean  | SD    | CI95% | anova p-value |         |  |
| All                         | 793 | 435.8             | 221.2 | 420.4 | 451.2         |         | 785               | 460.6 | 213.8 | 445.7 | 475.6         |         |  |
| Age classes (years)         |     |                   |       |       |               |         |                   |       |       |       |               |         |  |
| 35-44                       | 196 | 407.0             | 219.1 | 376.3 | 437.7         | 0.3103  | 191               | 472.7 | 205.0 | 443.6 | 501.8         | 0.3103  |  |
| 45-54                       | 204 | 436.7             | 209.3 | 408.0 | 465.4         |         | 216               | 443.8 | 208.7 | 416.0 | 471.6         |         |  |
| 55-64                       | 219 | 459.2             | 230.5 | 428.7 | 489.8         |         | 214               | 469.9 | 216.3 | 440.9 | 498.9         |         |  |
| 65-74                       | 174 | 442.5             | 225.6 | 409.0 | 476.1         |         | 164               | 457.0 | 231.8 | 421.5 | 492.4         |         |  |
| Italian Area                |     |                   |       |       |               |         |                   |       |       |       |               |         |  |
| North                       | 357 | 422.2             | 218.6 | 399.5 | 444.9         | 0.0692  | 359               | 460.5 | 213.4 | 438.4 | 482.5         | 0.0692  |  |
| Center                      | 180 | 446.4             | 210.5 | 415.7 | 477.2         |         | 184               | 495.7 | 226.1 | 463.0 | 528.4         |         |  |
| South                       | 256 | 447.3             | 231.5 | 418.9 | 475.6         |         | 242               | 434.9 | 202.0 | 409.4 | 460.3         |         |  |
| Education                   |     |                   |       |       |               |         |                   |       |       |       |               |         |  |
| Primary and middle school   | 201 | 428.9             | 208.9 | 400.0 | 457.8         | 0.0654  | 209               | 431.9 | 207.3 | 403.8 | 460.0         | 0.0654  |  |
| High school and university  | 591 | 438.4             | 225.2 | 420.2 | 456.5         |         | 575               | 470.3 | 215.4 | 452.7 | 487.9         |         |  |
| Fish (g/day)                |     |                   |       |       |               |         |                   |       |       |       |               |         |  |
|                             | N   | Mean              | SD    | CI95% | anova p-value |         | N                 | Mean  | SD    | CI95% | anova p-value |         |  |
| All                         | 793 | 45.5              | 34.7  | 43.1  | 47.9          |         | 785               | 42.7  | 30.5  | 40.5  | 44.8          |         |  |
| Age classes (years)         |     |                   |       |       |               |         |                   |       |       |       |               |         |  |
| 35-44                       | 196 | 46.6              | 35.1  | 41.7  | 51.6          | 0.6242  | 191               | 42.2  | 25.7  | 38.5  | 45.8          | 0.6242  |  |
| 45-54                       | 204 | 45.3              | 33.7  | 40.6  | 49.9          |         | 216               | 42.1  | 33.0  | 37.7  | 46.5          |         |  |
| 55-64                       | 219 | 47.0              | 36.0  | 42.3  | 51.8          |         | 214               | 43.8  | 31.6  | 39.5  | 48.0          |         |  |
| 65-74                       | 174 | 42.0              | 33.9  | 37.0  | 47.0          |         | 164               | 42.8  | 31.3  | 38.0  | 47.6          |         |  |
| Italian Area                |     |                   |       |       |               |         |                   |       |       |       |               |         |  |
| North                       | 357 | 47.7              | 36.7  | 43.9  | 51.5          | 0.3656  | 359               | 42.6  | 29.2  | 39.6  | 45.6          | 0.3656  |  |
| Center                      | 180 | 41.3              | 28.7  | 37.1  | 45.5          |         | 184               | 43.2  | 32.6  | 38.5  | 47.9          |         |  |
| South                       | 256 | 45.4              | 35.6  | 41.0  | 49.7          |         | 242               | 42.4  | 30.7  | 38.5  | 46.2          |         |  |
| Education                   |     |                   |       |       |               |         |                   |       |       |       |               |         |  |
| Primary and middle school   | 201 | 42.1              | 33.5  | 37.5  | 46.8          | 0.0504  | 209               | 41.0  | 30.5  | 36.9  | 45.2          | 0.0504  |  |
| High school and university  | 591 | 46.7              | 35.1  | 43.8  | 49.5          |         | 575               | 43.3  | 30.4  | 40.8  | 45.8          |         |  |
| Cheese (g/day)              |     |                   |       |       |               |         |                   |       |       |       |               |         |  |
|                             | N   | Mean              | SD    | CI95% | anova p-value |         | N                 | Mean  | SD    | CI95% | anova p-value |         |  |
| All                         | 793 | 42.7              | 34.3  | 40.4  | 45.1          |         | 785               | 37.2  | 31.5  | 35.0  | 39.4          |         |  |
| Age classes (years)         |     |                   |       |       |               |         |                   |       |       |       |               |         |  |
| 35-44                       | 196 | 44.7              | 37.8  | 39.4  | 50.0          | 0.0997  | 191               | 41.2  | 36.2  | 36.1  | 46.4          | 0.0997  |  |
| 45-54                       | 204 | 43.0              | 33.6  | 38.4  | 47.6          |         | 216               | 36.7  | 28.1  | 33.0  | 40.4          |         |  |
| 55-64                       | 219 | 42.4              | 33.1  | 38.0  | 46.8          |         | 214               | 35.6  | 29.5  | 31.7  | 39.6          |         |  |
| 65-74                       | 174 | 39.9              | 31.6  | 35.2  | 44.6          |         | 164               | 34.0  | 31.8  | 29.2  | 38.9          |         |  |
| Italian Area                |     |                   |       |       |               |         |                   |       |       |       |               |         |  |
| North                       | 357 | 46.5              | 36.8  | 42.7  | 50.3          | 0.0169  | 359               | 38.5  | 33.6  | 35.1  | 42.0          | 0.0169  |  |
| Center                      | 180 | 38.5              | 30.4  | 34.0  | 42.9          |         | 184               | 37.2  | 29.0  | 33.0  | 41.3          |         |  |
| South                       | 256 | 40.5              | 32.7  | 36.5  | 44.6          |         | 242               | 35.2  | 30.0  | 31.4  | 38.9          |         |  |
| Education                   |     |                   |       |       |               |         |                   |       |       |       |               |         |  |
| Primary and middle school   | 201 | 42.8              | 34.6  | 38.0  | 47.5          | 0.2342  | 209               | 33.9  | 33.4  | 29.4  | 38.4          | 0.2342  |  |
| High school and university  | 591 | 42.8              | 34.2  | 40.0  | 45.5          |         | 575               | 38.3  | 30.8  | 35.8  | 40.8          |         |  |

For vegetables intake, the following foods were considered: leafy vegetables-cooked, leafy vegetables-raw, other vegetables, tomatoes-raw, tomatoes-cooked, root vegetables, cabbages, mushrooms, grain and pod vegetables, onion, garlic, stalk vegetables, mixed salad, mixed vegetables.  
For vegetables intake were considered the following foods: leafy vegetable-cooked, leafy vegetable-raw, other vegetables, tomatoes-raw, tomatoes-cooked, root vegetables, cabbages, mushrooms, grain and pod vegetables, onion, garlic, stalk vegetables, mixed salad, mixed vegetables.  
For fruits intake, the following foods were considered: citrus fruits and other fruits.  
For fish intake, the following foods were considered: fish, crustaceans and molluscs.  
For cheese intake, the following foods were considered: cheeses (including fresh cheeses).  
Dietary information was collected by the self-administered Italian version of the food frequency questionnaire (FFQ) of the European Prospective Investigation into Cancer (EPIC).

SD: standard deviation; CI: confidence interval.

Means and standard deviations were age standardized by European standard population distribution 2013 (except when they are reported by age-classes).  
Anova to compare mean values among classes.

Pool of the following Italian regions: Piedmont, Lombardy, Liguria, Emilia Romagna, Tuscany, Lazio, Basilicata, Calabria, and Sicily.  
Italian Area: North (Piedmont, Lombardy, Liguria, Emilia Romagna); Center (Tuscany, Lazio); South (Basilicata, Calabria, Sicily).

**Table S.19. Age-standardized (European standard population) food group intake (EPIC questionnaire): processed meat, sweets/cakes, sweet drinks and alcohol mean by sex, age classes, geographical area and educational level. Men and women residing in Italy aged 35-74 years, Health Examination Survey 2018-2019 - CUORE Project.**

|                            | Men                    |       |       |        |       |               | Women |       |       |        |       |               |
|----------------------------|------------------------|-------|-------|--------|-------|---------------|-------|-------|-------|--------|-------|---------------|
|                            | Processed meat (g/day) |       |       |        |       |               |       |       |       |        |       |               |
|                            | N                      | Mean  | SD    | CI 95% |       | anova p-value | N     | Mean  | SD    | CI 95% |       | anova p-value |
| All                        | 793                    | 36,4  | 28,8  | 34,4   | 38,4  |               | 785   | 24,6  | 21,7  | 23,0   | 26,1  |               |
| Age classes (years)        |                        |       |       |        |       |               |       |       |       |        |       |               |
| 35-44                      | 196                    | 44,9  | 32,0  | 40,4   | 49,3  | <0,0001       | 191   | 29,1  | 23,2  | 25,8   | 32,4  | <0,0001       |
| 45-54                      | 204                    | 39,5  | 30,4  | 35,3   | 43,6  |               | 216   | 27,7  | 21,7  | 24,8   | 30,6  |               |
| 55-64                      | 219                    | 32,8  | 25,9  | 29,4   | 36,3  |               | 214   | 21,2  | 21,4  | 18,3   | 24,1  |               |
| 65-74                      | 174                    | 24,1  | 18,8  | 21,3   | 26,9  |               | 164   | 17,2  | 16,5  | 14,7   | 19,8  |               |
| Italian Area               |                        |       |       |        |       |               |       |       |       |        |       |               |
| North                      | 357                    | 33,3  | 25,6  | 30,7   | 36,0  | 0,0011        | 359   | 23,9  | 21,4  | 21,6   | 26,1  | 0,0011        |
| Center                     | 180                    | 34,9  | 27,1  | 30,9   | 38,8  |               | 184   | 23,8  | 21,5  | 20,7   | 26,9  |               |
| South                      | 256                    | 41,7  | 33,1  | 37,6   | 45,8  |               | 242   | 26,1  | 22,3  | 23,3   | 28,9  |               |
| Education                  |                        |       |       |        |       |               |       |       |       |        |       |               |
| Primary and middle school  | 201                    | 39,8  | 28,1  | 35,9   | 43,7  | 0,5038        | 209   | 23,3  | 22,2  | 20,3   | 26,3  | 0,5038        |
| High school and university | 591                    | 35,3  | 29,0  | 32,9   | 37,6  |               | 575   | 24,9  | 21,3  | 23,1   | 26,6  |               |
| Sweets/Cakes (g/day)       |                        |       |       |        |       |               |       |       |       |        |       |               |
|                            | N                      | Mean  | SD    | CI 95% |       | anova p-value | N     | Mean  | SD    | CI 95% |       | anova p-value |
| All                        | 793                    | 83,9  | 59,6  | 79,7   | 88,0  |               | 785   | 77,8  | 61,8  | 73,4   | 82,1  |               |
| Age classes (years)        |                        |       |       |        |       |               |       |       |       |        |       |               |
| 35-44                      | 196                    | 89,5  | 58,3  | 81,4   | 97,7  | <0,0001       | 191   | 87,1  | 63,1  | 78,2   | 96,1  | <0,0001       |
| 45-54                      | 204                    | 93,0  | 64,3  | 84,1   | 101,8 |               | 216   | 85,3  | 70,3  | 75,9   | 94,7  |               |
| 55-64                      | 219                    | 79,9  | 57,1  | 72,4   | 87,5  |               | 214   | 70,8  | 54,9  | 63,4   | 78,1  |               |
| 65-74                      | 174                    | 67,2  | 54,0  | 59,2   | 75,2  |               | 164   | 60,8  | 48,0  | 53,5   | 68,2  |               |
| Italian Area               |                        |       |       |        |       |               |       |       |       |        |       |               |
| North                      | 357                    | 87,4  | 60,5  | 81,1   | 93,7  | 0,1249        | 359   | 80,3  | 59,1  | 74,2   | 86,4  | 0,1249        |
| Center                     | 180                    | 78,6  | 53,5  | 70,7   | 86,4  |               | 184   | 73,7  | 59,4  | 65,1   | 82,3  |               |
| South                      | 256                    | 82,8  | 62,2  | 75,1   | 90,4  |               | 242   | 77,0  | 67,1  | 68,6   | 85,5  |               |
| Education                  |                        |       |       |        |       |               |       |       |       |        |       |               |
| Primary and middle school  | 201                    | 90,2  | 68,5  | 80,7   | 99,7  | 0,8558        | 209   | 73,6  | 58,8  | 65,7   | 81,6  | 0,8558        |
| High school and university | 591                    | 81,6  | 56,0  | 77,0   | 86,1  |               | 575   | 79,1  | 62,8  | 73,9   | 84,2  |               |
| Sweet Drinks (ml/day)      |                        |       |       |        |       |               |       |       |       |        |       |               |
|                            | N                      | Mean  | SD    | CI 95% |       | anova p-value | N     | Mean  | SD    | CI 95% |       | anova p-value |
| All                        | 793                    | 99,9  | 159,9 | 88,8   | 111,1 |               | 785   | 73,9  | 131,4 | 64,7   | 83,1  |               |
| Age classes (years)        |                        |       |       |        |       |               |       |       |       |        |       |               |
| 35-44                      | 196                    | 124,7 | 177,9 | 99,8   | 149,6 | <0,0001       | 191   | 108,8 | 158,9 | 86,2   | 131,3 | <0,0001       |
| 45-54                      | 204                    | 111,2 | 170,6 | 87,7   | 134,6 |               | 216   | 75,4  | 131,1 | 57,9   | 92,9  |               |
| 55-64                      | 219                    | 81,8  | 133,7 | 64,1   | 99,5  |               | 214   | 59,4  | 121,0 | 43,2   | 75,6  |               |
| 65-74                      | 174                    | 72,5  | 143,4 | 51,2   | 93,8  |               | 164   | 39,7  | 77,7  | 27,8   | 51,6  |               |
| Italian Area               |                        |       |       |        |       |               |       |       |       |        |       |               |
| North                      | 357                    | 93,3  | 139,3 | 78,9   | 107,8 | 0,1505        | 359   | 74,8  | 130,8 | 61,3   | 88,3  | 0,1505        |
| Center                     | 180                    | 83,3  | 132,6 | 64,0   | 102,7 |               | 184   | 73,4  | 127,7 | 54,9   | 91,8  |               |
| South                      | 256                    | 120,7 | 197,9 | 96,4   | 144,9 |               | 242   | 73,0  | 135,5 | 56,0   | 90,1  |               |
| Education                  |                        |       |       |        |       |               |       |       |       |        |       |               |
| Primary and middle school  | 201                    | 131,9 | 208,6 | 103,1  | 160,7 | 0,1004        | 209   | 65,8  | 116,6 | 50,0   | 81,7  | 0,1004        |
| High school and university | 591                    | 89,7  | 139,2 | 78,5   | 100,9 |               | 575   | 76,5  | 136,2 | 65,4   | 87,7  |               |
| Alcohol (g/day)            |                        |       |       |        |       |               |       |       |       |        |       |               |
|                            | N                      | Mean  | SD    | CI 95% |       | anova p-value | N     | Mean  | SD    | CI 95% |       | anova p-value |
| All                        | 793                    | 14,67 | 16,33 | 13,53  | 15,8  |               | 785   | 5,53  | 9,19  | 4,89   | 6,18  |               |
| Age classes (years)        |                        |       |       |        |       |               |       |       |       |        |       |               |
| 35-44                      | 196                    | 13,7  | 14,8  | 11,6   | 15,8  | 0,7067        | 191   | 6,1   | 10,4  | 4,6    | 7,6   | 0,7067        |
| 45-54                      | 204                    | 14,9  | 16,8  | 12,6   | 17,2  |               | 216   | 5,1   | 8,6   | 4,0    | 6,3   |               |
| 55-64                      | 219                    | 14,4  | 17,0  | 12,2   | 16,7  |               | 214   | 5,4   | 8,5   | 4,3    | 6,6   |               |
| 65-74                      | 174                    | 16,1  | 16,9  | 13,6   | 18,6  |               | 164   | 5,5   | 9,3   | 4,1    | 6,9   |               |
| Italian Area               |                        |       |       |        |       |               |       |       |       |        |       |               |
| North                      | 357                    | 16,1  | 16,0  | 14,5   | 17,8  | 0,0037        | 359   | 6,8   | 10,5  | 5,7    | 7,8   | 0,0037        |
| Center                     | 180                    | 12,2  | 14,2  | 10,1   | 14,3  |               | 184   | 5,9   | 8,4   | 4,7    | 7,1   |               |
| South                      | 256                    | 14,4  | 17,9  | 12,2   | 16,6  |               | 242   | 3,5   | 7,2   | 2,6    | 4,4   |               |
| Education                  |                        |       |       |        |       |               |       |       |       |        |       |               |
| Primary and middle school  | 201                    | 17,2  | 27,5  | 13,4   | 21,0  | 0,7387        | 209   | 5,2   | 9,0   | 4,0    | 6,4   | 0,7387        |
| High school and university | 591                    | 15,3  | 20,0  | 13,7   | 16,9  |               | 575   | 5,6   | 11,1  | 4,7    | 6,5   |               |

For processed meat intake, the following foods were considered: sausages, salami and other preserved meat.

For sweets/cakes intake, the following foods were considered: sugar, honey, jam, chocolate, candy bars, paste, confetti/flakes, confectionery non chocolate, ice cream, cakes, pies, pastries, puddings (not milk based), dry cakes, biscuits.

For sweet beverages intake, the following foods were considered: fruit and vegetable juices, carbonated/soft/isotonic drinks, diluted syrups.

For alcohol intake, the following foods were considered: alcoholic beverages.

Dietary information was collected by the self-administered Italian version of the food frequency questionnaire (FFQ) of the European Prospective Investigation into Cancer (EPIC).

SD: standard deviation; CI: confidence interval.

Means and standard deviations were age standardized by European standard population distribution 2013 (except when they are reported by age-classes).

Anova to compare mean values among classes.

Pool of the following Italian regions: Piedmont, Lombardy, Liguria, Emilia Romagna, Tuscany, Lazio, Basilicata, Calabria, and Sicily.

Italian Area: North (Piedmont, Lombardy, Liguria, Emilia Romagna); Center (Tuscany, Lazio); South (Basilicata, Calabria, Sicily).

**Table S.20. Age-standardized (European standard population) food groups intake (EPIC questionnaire): cereals, potatoes, legumes and oil mean by sex, age classes, geographical area and educational level.**  
**Men and women residing in Italy aged 35-74 years, Health Examination Survey 2018-2019 - CUORE Project.**

|                            |     | Men   |       |        |       |               | Women |       |      |        |       |               |
|----------------------------|-----|-------|-------|--------|-------|---------------|-------|-------|------|--------|-------|---------------|
| Cereals (g/day)            |     |       |       |        |       |               |       |       |      |        |       |               |
|                            | N   | Mean  | SD    | CI 95% |       | anova p-value | N     | Mean  | SD   | CI 95% |       | anova p-value |
| All                        | 793 | 177,2 | 95,7  | 170,6  | 183,9 |               | 785   | 135,9 | 84,8 | 130,0  | 141,8 |               |
| Age classes (years)        |     |       |       |        |       |               |       |       |      |        |       |               |
| 35-44                      | 196 | 176,6 | 96,9  | 163,0  | 190,2 | 0,1230        | 191   | 138,9 | 84,4 | 127,0  | 150,9 | 0,1230        |
| 45-54                      | 204 | 169,8 | 89,0  | 157,5  | 182,0 |               | 216   | 138,9 | 89,1 | 127,0  | 150,8 |               |
| 55-64                      | 219 | 190,3 | 102,5 | 176,7  | 203,9 |               | 214   | 136,6 | 83,4 | 125,4  | 147,8 |               |
| 65-74                      | 174 | 170,2 | 92,1  | 156,6  | 183,9 |               | 164   | 124,9 | 79,7 | 112,7  | 137,1 |               |
| Italian Area               |     |       |       |        |       |               |       |       |      |        |       |               |
| North                      | 357 | 181,5 | 99,9  | 171,2  | 191,9 | 0,5273        | 359   | 131,7 | 85,5 | 122,9  | 140,6 | 0,5273        |
| Center                     | 180 | 177,0 | 88,3  | 164,1  | 189,9 |               | 184   | 144,8 | 81,8 | 133,0  | 156,7 |               |
| South                      | 256 | 171,4 | 94,6  | 159,8  | 183,0 |               | 242   | 135,4 | 85,9 | 124,6  | 146,2 |               |
| Education                  |     |       |       |        |       |               |       |       |      |        |       |               |
| Primary and middle school  | 201 | 178,2 | 91,6  | 165,6  | 190,9 | 0,0375        | 209   | 119,8 | 73,8 | 109,8  | 129,8 | 0,0375        |
| High school and university | 591 | 176,8 | 97,1  | 169,0  | 184,6 |               | 575   | 141,3 | 87,7 | 134,1  | 148,4 |               |
| Potatoes (g/day)           |     |       |       |        |       |               |       |       |      |        |       |               |
|                            | N   | Mean  | SD    | CI 95% |       | anova p-value | N     | Mean  | SD   | CI 95% |       | anova p-value |
| All                        | 793 | 22,9  | 19,9  | 21,5   | 24,3  |               | 785   | 21,2  | 22,7 | 19,6   | 22,7  |               |
| Age classes (years)        |     |       |       |        |       |               |       |       |      |        |       |               |
| 35-44                      | 196 | 25,8  | 19,1  | 23,1   | 28,4  | <0,0001       | 191   | 25,0  | 29,5 | 20,8   | 29,2  | <0,0001       |
| 45-54                      | 204 | 24,9  | 19,5  | 22,2   | 27,6  |               | 216   | 24,0  | 21,4 | 21,2   | 26,9  |               |
| 55-64                      | 219 | 21,0  | 20,7  | 18,3   | 23,8  |               | 214   | 17,4  | 17,8 | 15,1   | 19,8  |               |
| 65-74                      | 174 | 18,2  | 19,4  | 15,4   | 21,1  |               | 164   | 15,9  | 17,3 | 13,3   | 18,6  |               |
| Italian Area               |     |       |       |        |       |               |       |       |      |        |       |               |
| North                      | 357 | 22,4  | 20,2  | 20,3   | 24,5  | 0,0265        | 359   | 19,5  | 18,5 | 17,6   | 21,4  | 0,0265        |
| Center                     | 180 | 23,3  | 20,3  | 20,4   | 26,3  |               | 184   | 19,5  | 19,8 | 16,7   | 22,4  |               |
| South                      | 256 | 23,3  | 19,2  | 21,0   | 25,7  |               | 242   | 24,8  | 29,0 | 21,1   | 28,4  |               |
| Education                  |     |       |       |        |       |               |       |       |      |        |       |               |
| Primary and middle school  | 201 | 21,3  | 19,6  | 18,6   | 24,0  | 0,1830        | 209   | 20,5  | 20,8 | 17,7   | 23,3  | 0,1830        |
| High school and university | 591 | 23,4  | 19,9  | 21,7   | 25,0  |               | 575   | 21,4  | 23,3 | 19,5   | 23,3  |               |
| Legumes (g/day)            |     |       |       |        |       |               |       |       |      |        |       |               |
|                            | N   | Mean  | SD    | CI 95% |       | anova p-value | N     | Mean  | SD   | CI 95% |       | anova p-value |
| All                        | 793 | 21,6  | 19,0  | 20,3   | 23,0  |               | 785   | 19,7  | 16,0 | 18,6   | 20,8  |               |
| Age classes (years)        |     |       |       |        |       |               |       |       |      |        |       |               |
| 35-44                      | 196 | 22,9  | 21,9  | 19,8   | 26,0  | 0,0710        | 191   | 21,0  | 17,9 | 18,4   | 23,5  | 0,0710        |
| 45-54                      | 204 | 21,9  | 18,0  | 19,5   | 24,4  |               | 216   | 20,1  | 15,5 | 18,1   | 22,2  |               |
| 55-64                      | 219 | 21,3  | 18,8  | 18,8   | 23,8  |               | 214   | 19,4  | 15,4 | 17,3   | 21,5  |               |
| 65-74                      | 174 | 19,7  | 16,0  | 17,3   | 22,1  |               | 164   | 17,5  | 14,1 | 15,3   | 19,6  |               |
| Italian Area               |     |       |       |        |       |               |       |       |      |        |       |               |
| North                      | 357 | 17,9  | 17,2  | 16,1   | 19,7  | <0,0001       | 359   | 16,3  | 14,0 | 14,8   | 17,7  | <0,0001       |
| Center                     | 180 | 22,8  | 19,2  | 20,0   | 25,6  |               | 184   | 19,8  | 16,8 | 17,3   | 22,2  |               |
| South                      | 256 | 25,9  | 20,2  | 23,5   | 28,4  |               | 242   | 24,7  | 16,8 | 22,6   | 26,8  |               |
| Education                  |     |       |       |        |       |               |       |       |      |        |       |               |
| Primary and middle school  | 201 | 18,8  | 14,2  | 16,9   | 20,8  | 0,0069        | 209   | 18,3  | 14,9 | 16,3   | 20,3  | 0,0069        |
| High school and university | 591 | 22,6  | 20,3  | 20,9   | 24,2  |               | 575   | 20,2  | 16,3 | 18,8   | 21,5  |               |
| Oil (g/day)                |     |       |       |        |       |               |       |       |      |        |       |               |
|                            | N   | Mean  | SD    | CI 95% |       | anova p-value | N     | Mean  | SD   | CI 95% |       | anova p-value |
| All                        | 793 | 15,8  | 11,34 | 15,01  | 16,59 |               | 785   | 17,45 | 11,3 | 16,66  | 18,24 |               |
| Age classes (years)        |     |       |       |        |       |               |       |       |      |        |       |               |
| 35-44                      | 196 | 13,7  | 10,1  | 12,3   | 15,1  | 0,2151        | 191   | 19,0  | 11,8 | 17,3   | 20,6  | 0,2151        |
| 45-54                      | 204 | 16,7  | 12,3  | 15,0   | 18,4  |               | 216   | 17,4  | 11,0 | 15,9   | 18,8  |               |
| 55-64                      | 219 | 17,6  | 11,4  | 16,1   | 19,1  |               | 214   | 16,7  | 10,9 | 15,2   | 18,2  |               |
| 65-74                      | 174 | 14,9  | 11,1  | 13,2   | 16,5  |               | 164   | 16,4  | 11,4 | 14,7   | 18,2  |               |
| Italian Area               |     |       |       |        |       |               |       |       |      |        |       |               |
| North                      | 357 | 16,32 | 11,43 | 15,13  | 17,51 | 0,2149        | 359   | 17,43 | 11,6 | 16,23  | 18,63 | 0,2149        |
| Center                     | 180 | 18,1  | 10,91 | 16,51  | 19,7  |               | 184   | 20,47 | 11,2 | 18,86  | 22,08 |               |
| South                      | 256 | 13,47 | 11,13 | 12,11  | 14,84 |               | 242   | 15,24 | 10,3 | 13,93  | 16,54 |               |
| Education                  |     |       |       |        |       |               |       |       |      |        |       |               |
| Primary and middle school  | 201 | 13,8  | 11,1  | 12,3   | 15,4  | <0,0001       | 209   | 14,0  | 10,1 | 12,6   | 15,3  | <0,0001       |
| High school and university | 591 | 16,5  | 11,3  | 15,6   | 17,4  |               | 575   | 18,7  | 11,4 | 17,8   | 19,6  |               |

For cereals intake, the following foods were considered: pasta, rice, white and whole meal bread, other grains, crispbread, rusks, and breakfast cereals.  
For potatoes intake, the following foods were considered: french fries, boiled potatoes, roasted potatoes, pure potatoes, croquette potatoes.  
Dietary information was collected by the self-administered Italian version of the food frequency questionnaire (FFQ) of the European Prospective Investigation into Cancer (EPIC).  
SD: standard deviation; CI: confidence interval.  
Means and standard deviations were age standardized by European standard population distribution 2013 (except when they are reported by age-classes).  
Anova to compare mean values among classes.  
Pool of the following Italian regions: Piedmont, Lombardy, Liguria, Emilia Romagna, Tuscany, Lazio, Basilicata, Calabria, and Sicily.  
Italian Area: North (Piedmont, Lombardy, Liguria, Emilia Romagna); Center (Tuscany, Lazio); South (Basilicata, Calabria, Sicily).

**Table S.21. Age-standardized (European standard population) food groups intake (EPIC questionnaire): meat, eggs, milk mean by sex, age classes, geographical area and educational level.**

**Men and women residing in Italy aged 35-74 years, Health Examination Survey 2018-2019 - CUORE Project.**

|                            | Men |       |       |        |       |               | Women |       |       |        |       |               |
|----------------------------|-----|-------|-------|--------|-------|---------------|-------|-------|-------|--------|-------|---------------|
| Meat (g/day)               |     |       |       |        |       |               |       |       |       |        |       |               |
|                            | N   | Mean  | SD    | CI 95% |       | anova p-value | N     | Mean  | SD    | CI 95% |       | anova p-value |
| All                        | 793 | 94,5  | 57,7  | 90,4   | 98,5  |               | 785   | 80,7  | 50,3  | 77,2   | 84,2  |               |
| Age classes (years)        |     |       |       |        |       |               |       |       |       |        |       |               |
| 35-44                      | 196 | 104,2 | 57,7  | 96,2   | 112,3 | <0,0001       | 191   | 88,7  | 53,7  | 81,1   | 96,3  | <0.0001       |
| 45-54                      | 204 | 100,4 | 57,9  | 92,4   | 108,3 |               | 216   | 87,7  | 51,2  | 80,9   | 94,6  |               |
| 55-64                      | 219 | 91,7  | 57,9  | 84,0   | 99,3  |               | 214   | 70,6  | 46,3  | 64,4   | 76,8  |               |
| 65-74                      | 174 | 74,7  | 52,5  | 66,9   | 82,5  |               | 164   | 71,5  | 45,0  | 64,6   | 78,4  |               |
| Italian Area               |     |       |       |        |       |               |       |       |       |        |       |               |
| North                      | 357 | 93,7  | 57,4  | 87,7   | 99,7  | 0,7367        | 359   | 81,2  | 52,9  | 75,7   | 86,7  | 0,7367        |
| Center                     | 180 | 94,2  | 55,1  | 86,2   | 102,3 |               | 184   | 83,9  | 48,9  | 76,8   | 90,9  |               |
| South                      | 256 | 95,7  | 60,1  | 88,4   | 103,1 |               | 242   | 77,6  | 47,3  | 71,6   | 83,5  |               |
| Education                  |     |       |       |        |       |               |       |       |       |        |       |               |
| Primary and middle school  | 201 | 98,9  | 58,3  | 90,9   | 107,0 | 0,6666        | 209   | 79,4  | 51,7  | 72,4   | 86,4  | 0,6666        |
| High school and university | 591 | 93,0  | 57,6  | 88,3   | 97,6  |               | 575   | 81,1  | 49,8  | 77,0   | 85,2  |               |
| Eggs (g/day)               |     |       |       |        |       |               |       |       |       |        |       |               |
|                            | N   | Mean  | SD    | CI 95% |       | anova p-value | N     | Mean  | SD    | CI 95% |       | anova p-value |
| All                        | 793 | 10,9  | 10,0  | 10,2   | 11,6  |               | 785   | 10,1  | 8,5   | 9,5    | 10,7  |               |
| Age classes (years)        |     |       |       |        |       |               |       |       |       |        |       |               |
| 35-44                      | 196 | 11,2  | 10,0  | 9,8    | 12,6  | 0,1783        | 191   | 10,6  | 9,1   | 9,3    | 11,9  | 0,1783        |
| 45-54                      | 204 | 11,4  | 11,6  | 9,8    | 13,0  |               | 216   | 10,2  | 7,8   | 9,1    | 11,2  |               |
| 55-64                      | 219 | 10,9  | 9,5   | 9,6    | 12,2  |               | 214   | 9,9   | 9,3   | 8,7    | 11,2  |               |
| 65-74                      | 174 | 9,6   | 7,8   | 8,4    | 10,7  |               | 164   | 9,4   | 7,7   | 8,2    | 10,6  |               |
| Italian Area               |     |       |       |        |       |               |       |       |       |        |       |               |
| North                      | 357 | 10,4  | 10,2  | 9,3    | 11,5  | 0,9016        | 359   | 10,7  | 9,7   | 9,7    | 11,7  | 0,9016        |
| Center                     | 180 | 10,8  | 9,5   | 9,4    | 12,2  |               | 184   | 10,0  | 8,1   | 8,9    | 11,2  |               |
| South                      | 256 | 11,6  | 10,1  | 10,4   | 12,8  |               | 242   | 9,2   | 6,9   | 8,3    | 10,1  |               |
| Education                  |     |       |       |        |       |               |       |       |       |        |       |               |
| Primary and middle school  | 201 | 11,4  | 11,7  | 9,8    | 13,0  | 0,6666        | 209   | 9,4   | 8,2   | 8,3    | 10,5  | 0,6666        |
| High school and university | 591 | 10,7  | 9,4   | 10,0   | 11,5  |               | 575   | 10,3  | 8,7   | 9,6    | 11,0  |               |
| Milk (ml/day)              |     |       |       |        |       |               |       |       |       |        |       |               |
|                            | N   | Mean  | SD    | CI 95% |       | anova p-value | N     | Mean  | SD    | CI 95% |       | anova p-value |
| All                        | 793 | 81,0  | 110,4 | 73,3   | 88,7  |               | 785   | 100,1 | 117,1 | 91,9   | 108,3 |               |
| Age classes (years)        |     |       |       |        |       |               |       |       |       |        |       |               |
| 35-44                      | 196 | 71,3  | 99,3  | 57,4   | 85,2  | 0,6325        | 191   | 110,4 | 117,6 | 93,8   | 127,1 | 0,6325        |
| 45-54                      | 204 | 73,0  | 105,5 | 58,5   | 87,5  |               | 216   | 108,0 | 126,0 | 91,2   | 124,8 |               |
| 55-64                      | 219 | 86,2  | 115,5 | 70,9   | 101,5 |               | 214   | 85,5  | 109,9 | 70,8   | 100,2 |               |
| 65-74                      | 174 | 100,2 | 123,6 | 81,8   | 118,5 |               | 164   | 93,0  | 109,5 | 76,3   | 109,8 |               |
| Italian Area               |     |       |       |        |       |               |       |       |       |        |       |               |
| North                      | 357 | 81,6  | 110,1 | 70,2   | 93,0  | 0,4855        | 359   | 92,7  | 112,9 | 81,0   | 104,3 | 0,4855        |
| Center                     | 180 | 80,8  | 102,4 | 65,8   | 95,7  |               | 184   | 108,8 | 116,9 | 91,9   | 125,7 |               |
| South                      | 256 | 80,2  | 116,6 | 65,9   | 94,5  |               | 242   | 104,6 | 123,1 | 89,1   | 120,1 |               |
| Education                  |     |       |       |        |       |               |       |       |       |        |       |               |
| Primary and middle school  | 201 | 79,3  | 106,2 | 64,7   | 94,0  | 0,9280        | 209   | 101,2 | 120,8 | 84,9   | 117,6 | 0,9280        |
| High school and university | 591 | 81,5  | 112,0 | 72,4   | 90,5  |               | 575   | 99,9  | 116,0 | 90,5   | 109,4 |               |

For meats intake, the following foods were considered: beef, veal, pork, horse, chicken, turkey, rabbit (domestic).

Dietary information was collected by the self-administered Italian version of the food frequency questionnaire (FFQ) of the European Prospective Investigation into Cancer (EPIC).

SD: standard deviation; CI: confidence interval.

Means and standard deviations were age standardized by European standard population distribution 2013 (except when they are reported by age-classes).

Anova to compare mean values among classes.

Pool of the following Italian regions: Piedmont, Lombardy, Liguria, Emilia Romagna, Tuscany, Lazio, Basilicata, Calabria, and Sicily.

Italian Area: North (Piedmont, Lombardy, Liguria, Emilia Romagna); Center (Tuscany, Lazio); South (Basilicata, Calabria, Sicily).

**Table S.22. Age-standardized (European standard population) nutrients intake (EPIC questionnaire): proteins (total, animal and vegetable) mean by sex, age classes, geographical area and educational level.**  
**Men and women residing in Italy aged 35-74 years, Health Examination Survey 2018-2019 - CUORE Project.**

|                                   |     | Men  |     |        |      |               | Women |      |     |        |      |               |
|-----------------------------------|-----|------|-----|--------|------|---------------|-------|------|-----|--------|------|---------------|
| Proteins Tot (% total Kcal)       |     |      |     |        |      |               |       |      |     |        |      |               |
|                                   | N   | Mean | SD  | CI 95% |      | anova p-value | N     | Mean | SD  | CI 95% |      | anova p-value |
| All                               | 793 | 15,5 | 3,1 | 15,3   | 15,7 |               | 785   | 16,0 | 3,5 | 15,8   | 16,3 |               |
| Age classes (years)               |     |      |     |        |      |               |       |      |     |        |      |               |
| 35-44                             | 196 | 15,8 | 2,6 | 15,5   | 16,2 | 0,9283        | 191   | 15,6 | 2,7 | 15,2   | 16,0 | 0,9283        |
| 45-54                             | 204 | 15,3 | 2,7 | 15,0   | 15,7 |               | 216   | 16,2 | 3,7 | 15,7   | 16,7 |               |
| 55-64                             | 219 | 15,5 | 3,0 | 15,1   | 15,9 |               | 214   | 15,9 | 3,8 | 15,4   | 16,4 |               |
| 65-74                             | 174 | 15,3 | 4,3 | 14,6   | 15,9 |               | 164   | 16,5 | 4,0 | 15,9   | 17,1 |               |
| Italian Area                      |     |      |     |        |      |               |       |      |     |        |      |               |
| North                             | 357 | 15,3 | 2,6 | 15,0   | 15,6 | 0,0975        | 359   | 15,9 | 3,3 | 15,6   | 16,2 | 0,0975        |
| Center                            | 180 | 15,5 | 2,5 | 15,1   | 15,8 |               | 184   | 16,0 | 3,9 | 15,4   | 16,6 |               |
| South                             | 256 | 15,8 | 4,0 | 15,3   | 16,3 |               | 242   | 16,3 | 3,7 | 15,8   | 16,7 |               |
| Education                         |     |      |     |        |      |               |       |      |     |        |      |               |
| Primary and middle school         | 201 | 15,3 | 2,8 | 14,9   | 15,7 | 0,8686        | 209   | 16,2 | 3,4 | 15,8   | 16,7 | 0,8686        |
| High school and university        | 591 | 15,6 | 3,2 | 15,3   | 15,8 |               | 575   | 16,0 | 3,6 | 15,7   | 16,3 |               |
| Animal proteins (% total Kcal)    |     |      |     |        |      |               |       |      |     |        |      |               |
|                                   | N   | Mean | SD  | CI 95% |      | anova p-value | N     | Mean | SD  | CI 95% |      | anova p-value |
| All                               | 793 | 10,4 | 3,7 | 10,1   | 10,6 |               | 785   | 10,8 | 4,1 | 10,5   | 11,1 |               |
| Age classes (years)               |     |      |     |        |      |               |       |      |     |        |      |               |
| 35-44                             | 196 | 10,9 | 3,0 | 10,4   | 11,3 | 0,6278        | 191   | 10,6 | 3,1 | 10,1   | 11,0 | 0,6278        |
| 45-54                             | 204 | 10,3 | 3,3 | 9,9    | 10,8 |               | 216   | 11,0 | 4,3 | 10,5   | 11,6 |               |
| 55-64                             | 219 | 10,2 | 3,5 | 9,7    | 10,7 |               | 214   | 10,6 | 4,4 | 10,1   | 11,2 |               |
| 65-74                             | 174 | 9,9  | 5,0 | 9,2    | 10,7 |               | 164   | 11,1 | 4,6 | 10,4   | 11,8 |               |
| Italian Area                      |     |      |     |        |      |               |       |      |     |        |      |               |
| North                             | 357 | 10,3 | 3,2 | 9,9    | 10,6 | 0,2704        | 359   | 10,8 | 3,8 | 10,4   | 11,2 | 0,2704        |
| Center                            | 180 | 10,1 | 3,1 | 9,7    | 10,6 |               | 184   | 10,7 | 4,5 | 10,0   | 11,3 |               |
| South                             | 256 | 10,7 | 4,5 | 10,1   | 11,2 |               | 242   | 10,9 | 4,2 | 10,4   | 11,5 |               |
| Education                         |     |      |     |        |      |               |       |      |     |        |      |               |
| Primary and middle school         | 201 | 10,3 | 3,2 | 9,9    | 10,8 | 0,3210        | 209   | 11,2 | 3,8 | 10,7   | 11,7 | 0,3210        |
| High school and university        | 591 | 10,4 | 3,8 | 10,1   | 10,7 |               | 575   | 10,7 | 4,2 | 10,4   | 11,0 |               |
| Vegetable proteins (% total Kcal) |     |      |     |        |      |               |       |      |     |        |      |               |
|                                   | N   | Mean | SD  | CI 95% |      | anova p-value | N     | Mean | SD  | CI 95% |      | anova p-value |
| All                               | 793 | 5,1  | 1,2 | 5,1    | 5,2  |               | 785   | 5,2  | 1,2 | 5,1    | 5,3  |               |
| Age classes (years)               |     |      |     |        |      |               |       |      |     |        |      |               |
| 35-44                             | 196 | 5,0  | 1,1 | 4,8    | 5,1  | <0,0001       | 191   | 5,1  | 1,1 | 4,9    | 5,2  | <0,0001       |
| 45-54                             | 204 | 5,0  | 1,1 | 4,8    | 5,2  |               | 216   | 5,2  | 1,3 | 5,0    | 5,3  |               |
| 55-64                             | 219 | 5,3  | 1,2 | 5,2    | 5,5  |               | 214   | 5,3  | 1,2 | 5,1    | 5,5  |               |
| 65-74                             | 174 | 5,3  | 1,4 | 5,1    | 5,5  |               | 164   | 5,4  | 1,4 | 5,2    | 5,6  |               |
| Italian Area                      |     |      |     |        |      |               |       |      |     |        |      |               |
| North                             | 357 | 5,1  | 1,1 | 4,9    | 5,2  | 0,0011        | 359   | 5,1  | 1,2 | 5,0    | 5,2  | 0,0011        |
| Center                            | 180 | 5,4  | 1,1 | 5,2    | 5,5  |               | 184   | 5,3  | 1,2 | 5,1    | 5,5  |               |
| South                             | 256 | 5,1  | 1,3 | 4,9    | 5,3  |               | 242   | 5,3  | 1,3 | 5,2    | 5,5  |               |
| Education                         |     |      |     |        |      |               |       |      |     |        |      |               |
| Primary and middle school         | 201 | 5,0  | 1,1 | 4,8    | 5,1  | 0,0060        | 209   | 5,0  | 1,3 | 4,9    | 5,2  | 0,0060        |
| High school and university        | 591 | 5,2  | 1,2 | 5,1    | 5,3  |               | 575   | 5,3  | 1,2 | 5,2    | 5,4  |               |

Dietary information was collected by the self-administered Italian version of the food frequency questionnaire (FFQ) of the European Prospective Investigation into Cancer (EPIC).

SD: standard deviation; CI: confidence interval.

Means and standard deviations were age standardized by European standard population distribution 2013 (except when they are reported by age-classes).

Anova to compare mean values among classes.

Pool of the following Italian regions: Piedmont, Lombardy, Liguria, Emilia Romagna, Tuscany, Lazio, Basilicata, Calabria, and Sicily.

Italian Area: North (Piedmont, Lombardy, Liguria, Emilia Romagna); Center (Tuscany, Lazio); South (Basilicata, Calabria, Sicily).

**Table S.23. Age-standardized (European standard population) nutrients intake (EPIC questionnaire): lipids (animal and vegetable) and cholesterol mean by sex, age classes, geographical area and educational level. Men and women residing in Italy aged 35-74 years, Health Examination Survey 2018-2019 - CUORE Project.**

|                                 | Men |       |      |        |       |               | Women |       |      |        |       |               |
|---------------------------------|-----|-------|------|--------|-------|---------------|-------|-------|------|--------|-------|---------------|
| Animal Lipids (% total Kcal)    |     |       |      |        |       |               |       |       |      |        |       |               |
|                                 | N   | Mean  | SD   | CI 95% |       | anova p-value | N     | Mean  | SD   | CI 95% |       | anova p-value |
| All                             | 793 | 17,9  | 5,3  | 17,6   | 18,3  |               | 785   | 17,6  | 5,1  | 17,2   | 18,0  |               |
| Age classes (years)             |     |       |      |        |       |               |       |       |      |        |       |               |
| 35-44                           | 196 | 19,2  | 5,0  | 18,5   | 19,9  | <0,0001       | 191   | 17,9  | 4,9  | 17,2   | 18,6  | <0,0001       |
| 45-54                           | 204 | 18,4  | 5,1  | 17,7   | 19,1  |               | 216   | 17,9  | 5,1  | 17,2   | 18,6  |               |
| 55-64                           | 219 | 17,2  | 5,2  | 16,5   | 17,9  |               | 214   | 17,3  | 5,4  | 16,6   | 18,0  |               |
| 65-74                           | 174 | 16,5  | 5,7  | 15,6   | 17,3  |               | 164   | 17,0  | 5,2  | 16,2   | 17,8  |               |
| Italian Area                    |     |       |      |        |       |               |       |       |      |        |       |               |
| North                           | 357 | 18,0  | 5,1  | 17,5   | 18,5  | 0,0074        | 359   | 17,7  | 4,9  | 17,2   | 18,2  | 0,0074        |
| Center                          | 180 | 17,2  | 5,2  | 16,4   | 18,0  |               | 184   | 16,9  | 5,1  | 16,1   | 17,6  |               |
| South                           | 256 | 18,4  | 5,6  | 17,7   | 19,1  |               | 242   | 17,9  | 5,5  | 17,2   | 18,6  |               |
| Education                       |     |       |      |        |       |               |       |       |      |        |       |               |
| Primary and middle school       | 201 | 18,2  | 5,3  | 17,4   | 18,9  | 0,0096        | 209   | 18,4  | 5,0  | 17,7   | 19,1  | 0,0096        |
| High school and university      | 591 | 17,7  | 5,4  | 17,3   | 18,2  |               | 575   | 17,2  | 5,2  | 16,8   | 17,7  |               |
| Vegetable Lipids (% total Kcal) |     |       |      |        |       |               |       |       |      |        |       |               |
|                                 | N   | Mean  | SD   | CI 95% |       | anova p-value | N     | Mean  | SD   | CI 95% |       | anova p-value |
| All                             | 793 | 17,1  | 5,7  | 16,7   | 17,5  |               | 785   | 19,9  | 6,3  | 19,5   | 20,4  |               |
| Age classes (years)             |     |       |      |        |       |               |       |       |      |        |       |               |
| 35-44                           | 196 | 16,5  | 5,1  | 15,8   | 17,2  | 0,1321        | 191   | 19,5  | 5,7  | 18,7   | 20,4  | 0,1321        |
| 45-54                           | 204 | 17,7  | 6,1  | 16,9   | 18,6  |               | 216   | 20,2  | 6,7  | 19,3   | 21,1  |               |
| 55-64                           | 219 | 17,0  | 5,8  | 16,2   | 17,8  |               | 214   | 19,9  | 6,2  | 19,0   | 20,7  |               |
| 65-74                           | 174 | 17,3  | 6,0  | 16,4   | 18,2  |               | 164   | 20,1  | 6,9  | 19,1   | 21,2  |               |
| Italian Area                    |     |       |      |        |       |               |       |       |      |        |       |               |
| North                           | 357 | 17,2  | 5,9  | 16,6   | 17,8  | 0,0056        | 359   | 20,2  | 6,7  | 19,5   | 20,8  | 0,0056        |
| Center                          | 180 | 18,1  | 5,9  | 17,2   | 18,9  |               | 184   | 20,2  | 6,4  | 19,3   | 21,1  |               |
| South                           | 256 | 16,4  | 5,3  | 15,7   | 17,0  |               | 242   | 19,4  | 5,8  | 18,7   | 20,1  |               |
| Education                       |     |       |      |        |       |               |       |       |      |        |       |               |
| Primary and middle school       | 201 | 16,0  | 5,7  | 15,2   | 16,7  | <0,0001       | 209   | 18,8  | 5,8  | 18,0   | 19,6  | <0,0001       |
| High school and university      | 591 | 17,5  | 5,7  | 17,1   | 18,0  |               | 575   | 20,4  | 6,5  | 19,8   | 20,9  |               |
| Cholesterol (mg/day)            |     |       |      |        |       |               |       |       |      |        |       |               |
|                                 | N   | Mean  | SD   | CI 95% |       | anova p-value | N     | Mean  | SD   | CI 95% |       | anova p-value |
| All                             | 793 | 154,3 | 48,2 | 151,0  | 157,7 |               | 785   | 161,5 | 53,1 | 157,8  | 165,2 |               |
| Age classes (years)             |     |       |      |        |       |               |       |       |      |        |       |               |
| 35-44                           | 196 | 160,7 | 44,2 | 154,5  | 166,8 | 0,2843        | 191   | 160,1 | 44,2 | 153,8  | 166,4 | 0,2843        |
| 45-54                           | 204 | 156,9 | 43,2 | 150,9  | 162,8 |               | 216   | 162,7 | 50,4 | 156,0  | 169,4 |               |
| 55-64                           | 219 | 149,6 | 50,7 | 142,9  | 156,3 |               | 214   | 160,6 | 57,7 | 152,9  | 168,4 |               |
| 65-74                           | 174 | 148,2 | 56,2 | 139,9  | 156,6 |               | 164   | 162,5 | 61,0 | 153,1  | 171,8 |               |
| Italian Area                    |     |       |      |        |       |               |       |       |      |        |       |               |
| North                           | 357 | 150,0 | 43,3 | 145,5  | 154,5 | 0,0045        | 359   | 163,9 | 53,1 | 158,4  | 169,4 | 0,0045        |
| Center                          | 180 | 150,0 | 47,2 | 143,2  | 156,9 |               | 184   | 153,1 | 49,5 | 146,0  | 160,3 |               |
| South                           | 256 | 162,0 | 55,9 | 155,2  | 168,9 |               | 242   | 164,2 | 56,2 | 157,1  | 171,3 |               |
| Education                       |     |       |      |        |       |               |       |       |      |        |       |               |
| Primary and middle school       | 201 | 157,1 | 43,2 | 151,2  | 163,1 | 0,0153        | 209   | 169,6 | 56,2 | 162,0  | 177,2 | 0,0153        |
| High school and university      | 591 | 153,5 | 49,8 | 149,5  | 157,5 |               | 575   | 158,7 | 51,4 | 154,5  | 162,9 |               |

Dietary information was collected by the self-administered Italian version of the food frequency questionnaire (FFQ) of the European Prospective Investigation into Cancer (EPIC).

SD: standard deviation; CI: confidence interval.

Means and standard deviations were age standardized by European standard population distribution 2013 (except when they are reported by age-classes).

Anova to compare mean values among classes.

Pool of the following Italian regions: Piedmont, Lombardy, Liguria, Emilia Romagna, Tuscany, Lazio, Basilicata, Calabria, and Sicily.

Italian Area: North (Piedmont, Lombardy, Liguria, Emilia Romagna); Center (Tuscany, Lazio); South (Basilicata, Calabria, Sicily).

**Table S.24. Age-standardized (European standard population) nutrients intake (EPIC questionnaire): saturated, polyunsaturated and monounsaturated fat, lipids total mean by sex, age classes, geographical area and educational level.**

**Men and women residing in Italy aged 35-74 years, Health Examination Survey 2018-2019 - CUORE Project.**

|                                    |     | Men  |     |        |      |               | Women |      |     |        |      |               |
|------------------------------------|-----|------|-----|--------|------|---------------|-------|------|-----|--------|------|---------------|
| Saturated fat (% total Kcal)       |     |      |     |        |      |               |       |      |     |        |      |               |
|                                    | N   | Mean | SD  | CI 95% |      | anova p-value | N     | Mean | SD  | CI 95% |      | anova p-value |
| All                                | 793 | 11,0 | 2,4 | 10,8   | 11,1 |               | 785   | 11,4 | 2,4 | 11,2   | 11,6 |               |
| Age classes (years)                |     |      |     |        |      |               |       |      |     |        |      |               |
| 35-44                              | 196 | 11,3 | 2,3 | 11,0   | 11,6 | <0,0001       | 191   | 11,6 | 2,3 | 11,2   | 11,9 | <0,0001       |
| 45-54                              | 204 | 11,3 | 2,3 | 10,9   | 11,6 |               | 216   | 11,5 | 2,3 | 11,2   | 11,8 |               |
| 55-64                              | 219 | 10,6 | 2,4 | 10,3   | 11,0 |               | 214   | 11,3 | 2,6 | 10,9   | 11,6 |               |
| 65-74                              | 174 | 10,4 | 2,7 | 10,0   | 10,8 |               | 164   | 11,1 | 2,5 | 10,7   | 11,5 |               |
| Italian Area                       |     |      |     |        |      |               |       |      |     |        |      |               |
| North                              | 357 | 11,2 | 2,4 | 10,9   | 11,4 | 0,0048        | 359   | 11,5 | 2,3 | 11,3   | 11,8 | 0,0048        |
| Center                             | 180 | 10,6 | 2,5 | 10,3   | 11,0 |               | 184   | 11,0 | 2,3 | 10,7   | 11,3 |               |
| South                              | 256 | 10,9 | 2,5 | 10,6   | 11,2 |               | 242   | 11,5 | 2,7 | 11,1   | 11,8 |               |
| Education                          |     |      |     |        |      |               |       |      |     |        |      |               |
| Primary and middle school          | 201 | 10,9 | 2,4 | 10,6   | 11,2 | 0,4720        | 209   | 11,6 | 2,4 | 11,3   | 11,9 | 0,4720        |
| High school and university         | 591 | 11,0 | 2,5 | 10,8   | 11,2 |               | 575   | 11,3 | 2,4 | 11,1   | 11,5 |               |
| Polyunsaturated fat (% total Kcal) |     |      |     |        |      |               |       |      |     |        |      |               |
|                                    | N   | Mean | SD  | CI 95% |      | anova p-value | N     | Mean | SD  | CI 95% |      | anova p-value |
| All                                | 793 | 5,0  | 1,3 | 4,9    | 5,1  |               | 785   | 5,3  | 1,4 | 5,2    | 5,4  |               |
| Age classes (years)                |     |      |     |        |      |               |       |      |     |        |      |               |
| 35-44                              | 196 | 5,2  | 1,1 | 5,0    | 5,3  | 0,0069        | 191   | 5,3  | 1,2 | 5,1    | 5,4  | 0,0069        |
| 45-54                              | 204 | 5,2  | 1,5 | 5,0    | 5,4  |               | 216   | 5,5  | 1,3 | 5,3    | 5,6  |               |
| 55-64                              | 219 | 4,8  | 1,3 | 4,7    | 5,0  |               | 214   | 5,3  | 1,3 | 5,1    | 5,4  |               |
| 65-74                              | 174 | 4,8  | 1,4 | 4,6    | 5,0  |               | 164   | 5,3  | 1,8 | 5,1    | 5,6  |               |
| Italian Area                       |     |      |     |        |      |               |       |      |     |        |      |               |
| North                              | 357 | 4,9  | 1,3 | 4,8    | 5,1  | 0,8683        | 359   | 5,4  | 1,5 | 5,3    | 5,6  | 0,8683        |
| Center                             | 180 | 5,1  | 1,2 | 4,9    | 5,3  |               | 184   | 5,2  | 1,2 | 5,0    | 5,4  |               |
| South                              | 256 | 5,1  | 1,5 | 4,9    | 5,2  |               | 242   | 5,3  | 1,3 | 5,1    | 5,5  |               |
| Education                          |     |      |     |        |      |               |       |      |     |        |      |               |
| Primary and middle school          | 201 | 5,0  | 1,4 | 4,8    | 5,2  | 0,9168        | 209   | 5,4  | 1,3 | 5,2    | 5,5  | 0,9168        |
| High school and university         | 591 | 5,0  | 1,3 | 4,9    | 5,1  |               | 575   | 5,3  | 1,4 | 5,2    | 5,4  |               |
| Monounsaturated fat (% total Kcal) |     |      |     |        |      |               |       |      |     |        |      |               |
|                                    | N   | Mean | SD  | CI 95% |      | anova p-value | N     | Mean | SD  | CI 95% |      | anova p-value |
| All                                | 793 | 16,1 | 3,7 | 15,9   | 16,4 |               | 785   | 17,6 | 4,0 | 17,4   | 17,9 |               |
| Age classes (years)                |     |      |     |        |      |               |       |      |     |        |      |               |
| 35-44                              | 196 | 16,2 | 3,1 | 15,8   | 16,6 | 0,0473        | 191   | 17,6 | 3,4 | 17,1   | 18,0 | 0,0473        |
| 45-54                              | 204 | 16,7 | 3,8 | 16,1   | 17,2 |               | 216   | 17,9 | 4,3 | 17,3   | 18,5 |               |
| 55-64                              | 219 | 15,8 | 3,9 | 15,3   | 16,4 |               | 214   | 17,5 | 3,8 | 17,0   | 18,0 |               |
| 65-74                              | 174 | 15,7 | 3,8 | 15,1   | 16,3 |               | 164   | 17,5 | 4,7 | 16,8   | 18,2 |               |
| Italian Area                       |     |      |     |        |      |               |       |      |     |        |      |               |
| North                              | 357 | 16,1 | 3,7 | 15,7   | 16,5 | 0,2615        | 359   | 17,7 | 4,2 | 17,3   | 18,1 | 0,2615        |
| Center                             | 180 | 16,5 | 3,6 | 16,0   | 17,1 |               | 184   | 17,7 | 3,8 | 17,2   | 18,2 |               |
| South                              | 256 | 15,9 | 3,7 | 15,5   | 16,4 |               | 242   | 17,5 | 3,9 | 17,0   | 18,0 |               |
| Education                          |     |      |     |        |      |               |       |      |     |        |      |               |
| Primary and middle school          | 201 | 15,4 | 3,6 | 14,9   | 15,9 | 0,0008        | 209   | 17,2 | 3,9 | 16,6   | 17,7 | 0,0008        |
| High school and university         | 591 | 16,4 | 3,7 | 16,1   | 16,7 |               | 575   | 17,8 | 4,1 | 17,5   | 18,1 |               |
| Lipids Tot (% total Kcal)          |     |      |     |        |      |               |       |      |     |        |      |               |
|                                    | N   | Mean | SD  | CI 95% |      | anova p-value | N     | Mean | SD  | CI 95% |      | anova p-value |
| All                                | 793 | 35,1 | 6,6 | 34,6   | 35,5 |               | 785   | 37,5 | 6,5 | 37,1   | 38,0 |               |
| Age classes (years)                |     |      |     |        |      |               |       |      |     |        |      |               |
| 35-44                              | 196 | 35,7 | 5,5 | 34,9   | 36,5 | 0,0009        | 191   | 37,5 | 5,7 | 36,7   | 38,3 | 0,0009        |
| 45-54                              | 204 | 36,1 | 6,6 | 35,2   | 37,0 |               | 216   | 38,1 | 6,4 | 37,2   | 38,9 |               |
| 55-64                              | 219 | 34,2 | 6,9 | 33,3   | 35,1 |               | 214   | 37,2 | 6,4 | 36,3   | 38,1 |               |
| 65-74                              | 174 | 33,8 | 7,1 | 32,7   | 34,8 |               | 164   | 37,1 | 7,9 | 35,9   | 38,3 |               |
| Italian Area                       |     |      |     |        |      |               |       |      |     |        |      |               |
| North                              | 357 | 35,2 | 6,2 | 34,5   | 35,8 | 0,2901        | 359   | 37,9 | 6,6 | 37,2   | 38,6 | 0,2901        |
| Center                             | 180 | 35,3 | 6,4 | 34,3   | 36,2 |               | 184   | 37,0 | 5,9 | 36,2   | 37,9 |               |
| South                              | 256 | 34,8 | 7,2 | 33,9   | 35,6 |               | 242   | 37,3 | 6,9 | 36,5   | 38,2 |               |
| Education                          |     |      |     |        |      |               |       |      |     |        |      |               |
| Primary and middle school          | 201 | 34,1 | 6,6 | 33,2   | 35,0 | 0,0593        | 209   | 37,2 | 6,6 | 36,3   | 38,1 | 0,0593        |
| High school and university         | 591 | 35,3 | 6,6 | 34,7   | 35,8 |               | 575   | 37,6 | 6,6 | 37,1   | 38,1 |               |

Dietary information was collected by the self-administered Italian version of the food frequency questionnaire (FFQ) of the European Prospective Investigation into Cancer (EPIC).

SD: standard deviation; CI: confidence interval.

Means and standard deviations were age standardized by European standard population distribution 2013 (except when they are reported by age-classes).

Anova to compare mean values among classes.

Pool of the following Italian regions: Piedmont, Lombardy, Liguria, Emilia Romagna, Tuscany, Lazio, Basilicata, Calabria, and Sicily.

Italian Area: North (Piedmont, Lombardy, Liguria, Emilia Romagna); Center (Tuscany, Lazio); South (Basilicata, Calabria, Sicily)



**Table S.25. Age-standardized (European standard population) nutrients intake (EPIC questionnaire) fiber, sodium, potassium, carbohydrate and simple carbohydrate mean by sex, age classes, geographical area and educational level.**

**Men and women residing in Italy aged 35-74 years, Health Examination Survey 2018-2019 - CUORE Project.**

|                                     |     | Men  |      |        |      |                  | Women |      |      |        |      |                  |
|-------------------------------------|-----|------|------|--------|------|------------------|-------|------|------|--------|------|------------------|
| Fiber (g/day)                       |     |      |      |        |      |                  |       |      |      |        |      |                  |
|                                     | N   | Mean | SD   | CI 95% |      | anova<br>p-value | N     | Mean | SD   | CI 95% |      | anova<br>p-value |
| All                                 | 793 | 9,9  | 2,7  | 9,7    | 10,0 |                  | 785   | 11,3 | 3,0  | 11,1   | 11,5 |                  |
| Age classes (years)                 |     |      |      |        |      |                  |       |      |      |        |      |                  |
| 35-44                               | 196 | 9,2  | 2,5  | 8,9    | 9,6  | <0,0001          | 191   | 10,8 | 2,7  | 10,4   | 11,2 | <0,0001          |
| 45-54                               | 204 | 9,7  | 3,0  | 9,3    | 10,1 |                  | 216   | 11,1 | 3,2  | 10,7   | 11,5 |                  |
| 55-64                               | 219 | 10,2 | 2,5  | 9,9    | 10,5 |                  | 214   | 11,7 | 3,0  | 11,3   | 12,1 |                  |
| 65-74                               | 174 | 10,4 | 2,8  | 10,0   | 10,9 |                  | 164   | 11,6 | 2,8  | 11,1   | 12,0 |                  |
| Italian Area                        |     |      |      |        |      |                  |       |      |      |        |      |                  |
| North                               | 357 | 9,6  | 2,7  | 9,3    | 9,9  | 0,0049           | 359   | 11,1 | 3,1  | 10,8   | 11,4 | 0,0049           |
| Center                              | 180 | 10,4 | 2,8  | 10,0   | 10,8 |                  | 184   | 11,5 | 2,9  | 11,1   | 12,0 |                  |
| South                               | 256 | 9,9  | 2,7  | 9,6    | 10,2 |                  | 242   | 11,3 | 2,8  | 11,0   | 11,7 |                  |
| Education                           |     |      |      |        |      |                  |       |      |      |        |      |                  |
| Primary and middle school           | 201 | 9,5  | 2,4  | 9,2    | 9,8  | 0,0358           | 209   | 11,0 | 3,1  | 10,6   | 11,4 | 0,0358           |
| High school and university          | 591 | 10,0 | 2,8  | 9,7    | 10,2 |                  | 575   | 11,3 | 2,9  | 11,1   | 11,6 |                  |
| Sodium (g/day)                      |     |      |      |        |      |                  |       |      |      |        |      |                  |
|                                     | N   | Mean | SD   | CI 95% |      | anova<br>p-value | N     | Mean | SD   | CI 95% |      | anova<br>p-value |
| All                                 | 793 | 2,5  | 1,0  | 2,4    | 2,6  |                  | 785   | 2,1  | 0,9  | 2,0    | 2,2  |                  |
| Age classes (years)                 |     |      |      |        |      |                  |       |      |      |        |      |                  |
| 35-44                               | 196 | 2,7  | 1,1  | 2,5    | 2,8  | <0,0001          | 191   | 2,3  | 1,0  | 2,2    | 2,4  | <0,0001          |
| 45-54                               | 204 | 2,6  | 1,0  | 2,5    | 2,7  |                  | 216   | 2,2  | 0,9  | 2,1    | 2,3  |                  |
| 55-64                               | 219 | 2,5  | 1,0  | 2,3    | 2,6  |                  | 214   | 2,0  | 0,9  | 1,9    | 2,1  |                  |
| 65-74                               | 174 | 2,2  | 0,9  | 2,0    | 2,3  |                  | 164   | 1,8  | 0,9  | 1,6    | 1,9  |                  |
| Italian Area                        |     |      |      |        |      |                  |       |      |      |        |      |                  |
| North                               | 357 | 2,5  | 1,0  | 2,4    | 2,6  | 0,9334           | 359   | 2,1  | 0,9  | 2,0    | 2,2  | 0,9334           |
| Center                              | 180 | 2,4  | 0,9  | 2,3    | 2,5  |                  | 184   | 2,1  | 1,0  | 2,0    | 2,3  |                  |
| South                               | 256 | 2,5  | 1,1  | 2,4    | 2,7  |                  | 242   | 2,0  | 1,0  | 1,9    | 2,2  |                  |
| Education                           |     |      |      |        |      |                  |       |      |      |        |      |                  |
| Primary and middle school           | 201 | 2,6  | 1,1  | 2,5    | 2,8  | 0,2252           | 209   | 1,9  | 0,9  | 1,8    | 2,0  | 0,2252           |
| High school and university          | 591 | 2,5  | 1,0  | 2,4    | 2,6  |                  | 575   | 2,2  | 1,0  | 2,1    | 2,2  |                  |
| Potassium (g/day)                   |     |      |      |        |      |                  |       |      |      |        |      |                  |
|                                     | N   | Mean | SD   | CI 95% |      | anova<br>p-value | N     | Mean | SD   | CI 95% |      | anova<br>p-value |
| All                                 | 793 | 3,2  | 1,0  | 3,1    | 3,3  |                  | 785   | 3,0  | 1,0  | 3,0    | 3,1  |                  |
| Age classes (years)                 |     |      |      |        |      |                  |       |      |      |        |      |                  |
| 35-44                               | 196 | 3,2  | 1,0  | 3,1    | 3,3  | <0,0001          | 191   | 3,2  | 1,0  | 3,1    | 3,3  | <0,0001          |
| 45-54                               | 204 | 3,3  | 1,0  | 3,1    | 3,4  |                  | 216   | 3,1  | 1,0  | 3,0    | 3,2  |                  |
| 55-64                               | 219 | 3,2  | 1,1  | 3,1    | 3,3  |                  | 214   | 2,9  | 1,0  | 2,8    | 3,1  |                  |
| 65-74                               | 174 | 3,0  | 1,0  | 2,8    | 3,1  |                  | 164   | 2,8  | 1,1  | 2,6    | 2,9  |                  |
| Italian Area                        |     |      |      |        |      |                  |       |      |      |        |      |                  |
| North                               | 357 | 3,2  | 1,0  | 3,1    | 3,3  | 0,8018           | 359   | 3,0  | 1,0  | 2,9    | 3,1  | 0,8018           |
| Center                              | 180 | 3,1  | 0,9  | 3,0    | 3,3  |                  | 184   | 3,1  | 1,0  | 3,0    | 3,2  |                  |
| South                               | 256 | 3,2  | 1,2  | 3,1    | 3,3  |                  | 242   | 2,9  | 1,1  | 2,8    | 3,1  |                  |
| Education                           |     |      |      |        |      |                  |       |      |      |        |      |                  |
| Primary and middle school           | 201 | 3,2  | 1,1  | 3,0    | 3,3  | 0,0008           | 209   | 2,8  | 1,0  | 2,6    | 2,9  | 0,0008           |
| High school and university          | 591 | 3,2  | 1,0  | 3,1    | 3,3  |                  | 575   | 3,1  | 1,0  | 3,0    | 3,2  |                  |
| Carbohydrate (% total Kcal)         |     |      |      |        |      |                  |       |      |      |        |      |                  |
|                                     | N   | Mean | SD   | CI 95% |      | anova<br>p-value | N     | Mean | SD   | CI 95% |      | anova<br>p-value |
| All                                 | 793 | 48,0 | 9,0  | 47,3   | 48,6 |                  | 785   | 47,5 | 8,8  | 46,8   | 48,1 |                  |
| Age classes (years)                 |     |      |      |        |      |                  |       |      |      |        |      |                  |
| 35-44                               | 196 | 47,3 | 7,8  | 46,2   | 48,4 | 0,2268           | 191   | 47,9 | 7,5  | 46,9   | 49,0 | 0,2268           |
| 45-54                               | 204 | 47,3 | 8,9  | 46,0   | 48,5 |                  | 216   | 46,9 | 8,6  | 45,7   | 48,0 |                  |
| 55-64                               | 219 | 48,9 | 9,5  | 47,7   | 50,2 |                  | 214   | 47,7 | 8,7  | 46,5   | 48,8 |                  |
| 65-74                               | 174 | 48,5 | 9,9  | 47,0   | 50,0 |                  | 164   | 47,4 | 11,1 | 45,7   | 49,1 |                  |
| Italian Area                        |     |      |      |        |      |                  |       |      |      |        |      |                  |
| North                               | 357 | 47,5 | 8,4  | 46,6   | 48,4 | 0,0647           | 359   | 46,8 | 8,9  | 45,9   | 47,7 | 0,0647           |
| Center                              | 180 | 48,4 | 8,2  | 47,2   | 49,6 |                  | 184   | 47,8 | 8,1  | 46,6   | 48,9 |                  |
| South                               | 256 | 48,3 | 10,1 | 47,0   | 49,5 |                  | 242   | 48,1 | 9,2  | 47,0   | 49,3 |                  |
| Education                           |     |      |      |        |      |                  |       |      |      |        |      |                  |
| Primary and middle school           | 201 | 48,6 | 9,0  | 47,4   | 49,9 | 0,1040           | 209   | 48,0 | 8,7  | 46,8   | 49,1 | 0,1040           |
| High school and university          | 591 | 47,7 | 8,9  | 47,0   | 48,4 |                  | 575   | 47,3 | 8,9  | 46,5   | 48,0 |                  |
| Simple carbohydrates (% total Kcal) |     |      |      |        |      |                  |       |      |      |        |      |                  |
|                                     | N   | Mean | SD   | CI 95% |      | anova<br>p-value | N     | Mean | SD   | CI 95% |      | anova<br>p-value |
| All                                 | 793 | 18,6 | 6,2  | 18,1   | 19,0 |                  | 785   | 20,2 | 6,6  | 19,7   | 20,6 |                  |
| Age classes (years)                 |     |      |      |        |      |                  |       |      |      |        |      |                  |
| 35-44                               | 196 | 18,4 | 5,7  | 17,6   | 19,2 | 0,6066           | 191   | 20,9 | 6,4  | 20,0   | 21,8 | 0,6066           |
| 45-54                               | 204 | 18,8 | 5,8  | 18,0   | 19,6 |                  | 216   | 20,0 | 6,5  | 19,1   | 20,8 |                  |
| 55-64                               | 219 | 18,4 | 6,4  | 17,5   | 19,2 |                  | 214   | 20,2 | 6,3  | 19,3   | 21,0 |                  |
| 65-74                               | 174 | 18,7 | 7,2  | 17,6   | 19,7 |                  | 164   | 19,4 | 7,7  | 18,2   | 20,6 |                  |
| Italian Area                        |     |      |      |        |      |                  |       |      |      |        |      |                  |
| North                               | 357 | 18,4 | 5,7  | 17,8   | 19,0 | 0,8063           | 359   | 20,5 | 6,8  | 19,8   | 21,2 | 0,8063           |
| Center                              | 180 | 18,5 | 5,6  | 17,7   | 19,3 |                  | 184   | 20,0 | 6,4  | 19,1   | 20,9 |                  |
| South                               | 256 | 18,8 | 7,2  | 17,9   | 19,7 |                  | 242   | 19,8 | 6,6  | 18,9   | 20,6 |                  |
| Education                           |     |      |      |        |      |                  |       |      |      |        |      |                  |
| Primary and middle school           | 201 | 19,4 | 7,1  | 18,5   | 20,4 | 0,0033           | 209   | 21,0 | 7,0  | 20,0   | 21,9 | 0,0033           |
| High school and university          | 591 | 18,3 | 5,9  | 17,8   | 18,8 |                  | 575   | 19,9 | 6,5  | 19,3   | 20,4 |                  |

Dietary information was collected by the self-administered Italian version of the food frequency questionnaire (FFQ) of the European Prospective Investigation into Cancer (EPIC).

SD: standard deviation; CI: confidence interval.

Means and standard deviations were age standardized by European standard population distribution 2013 (except when they are reported by age-classes).

Anova to compare mean values among classes.

Pool of the following Italian regions: Piedmont, Lombardy, Liguria, Emilia Romagna, Tuscany, Lazio, Basilicata, Calabria, and Sicily.

Italian Area: North (Piedmont, Lombardy, Liguria, Emilia Romagna); Center (Tuscany, Lazio); South (Basilicata, Calabria, Sicily).
