# Supplementary material for: Nutrition, Physical Activity and Smoking Habit in the Italian General Adult Population: CUORE Project Health Examination Survey 2018–2019
Source: MDPI journal article supplement (doi:10.3390/healthcare12040475), 2024-02-15
Supplement: s1 [file s1]

**Figure S.1. Age-standardized (Italian population) type of daily consumed cigarettes by age classes, geographical area and educational level. Men residing in Italy aged 35-74 years, Health Examination Survey 2018-2019 - CUORE Project.**

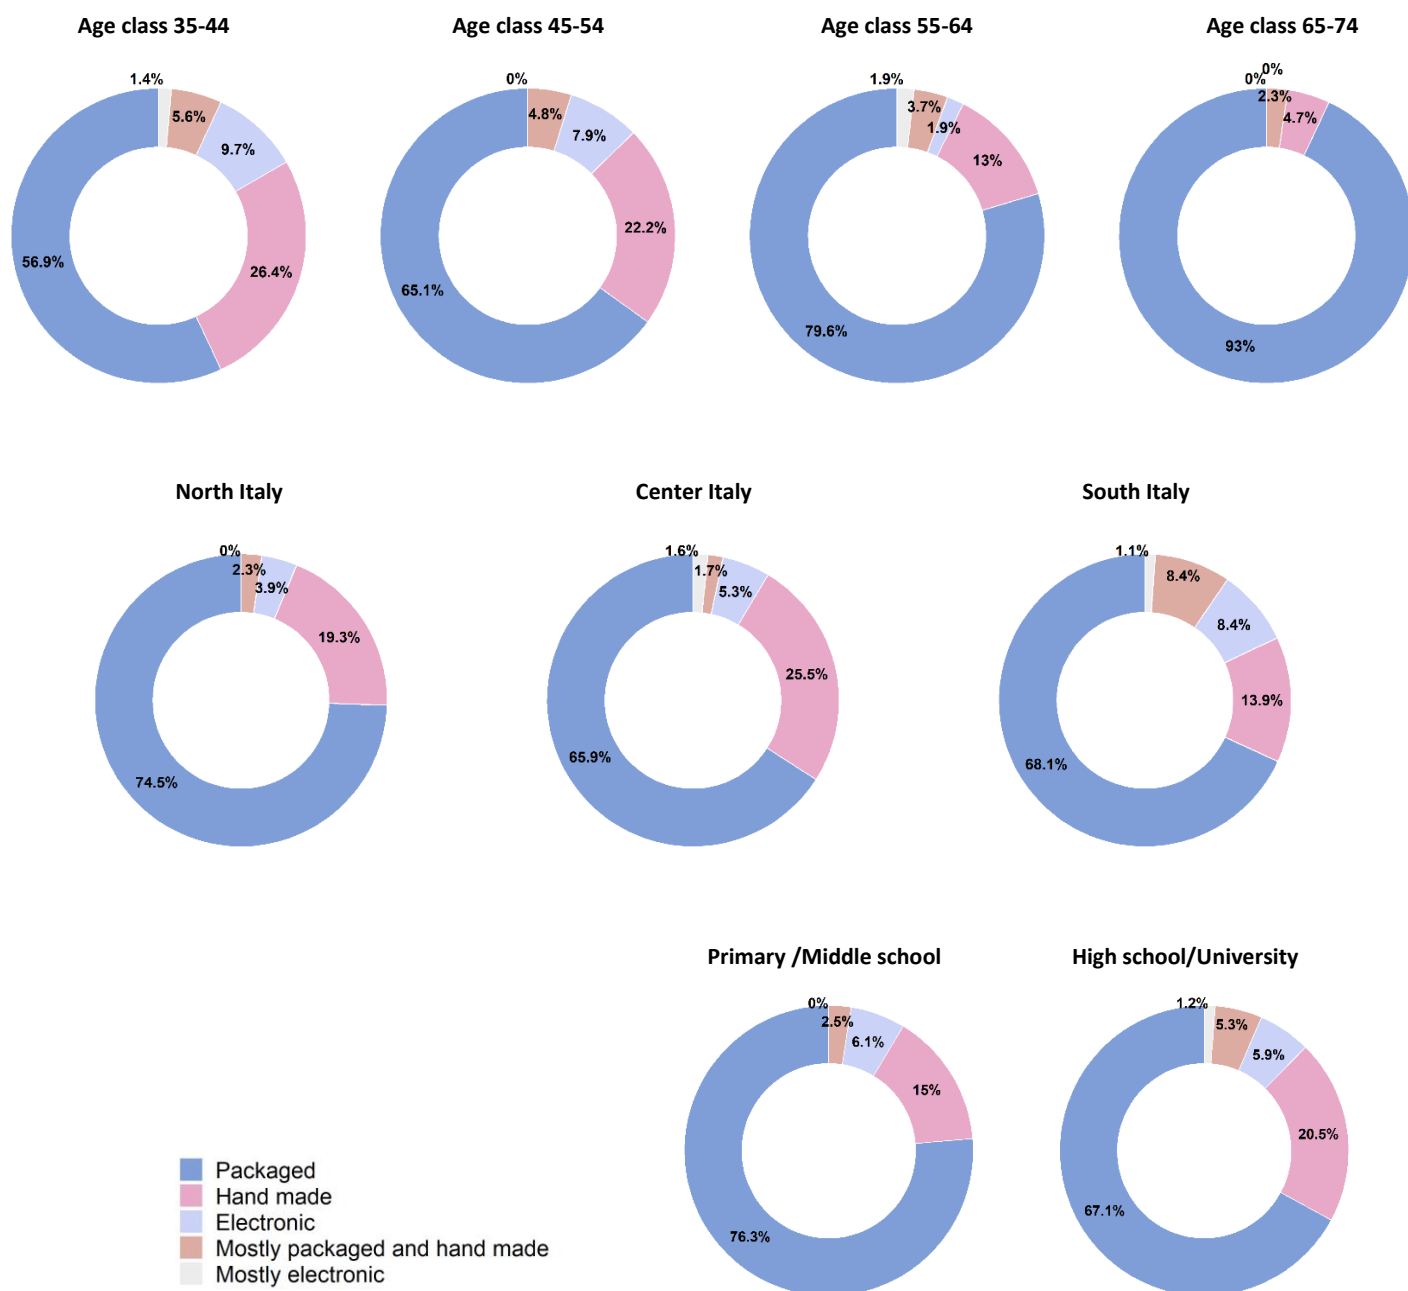

Pool of the following Italian regions: Piedmont, Lombardy, Liguria, Emilia Romagna, Tuscany, Lazio, Abruzzo, Basilicata, Calabria, and Sicily.  
Prevalence was age standardized by Italian National Institute of Statistics-ISTAT Italian population 2019 (except when it is reported by age-classes).

**Figure S.2. Age-standardized (Italian population) type of daily consumed cigarettes by age classes, geographical area and educational level. Women residing in Italy aged 35-74 years, Health Examination Survey 2018-2019 - CUORE Project.**

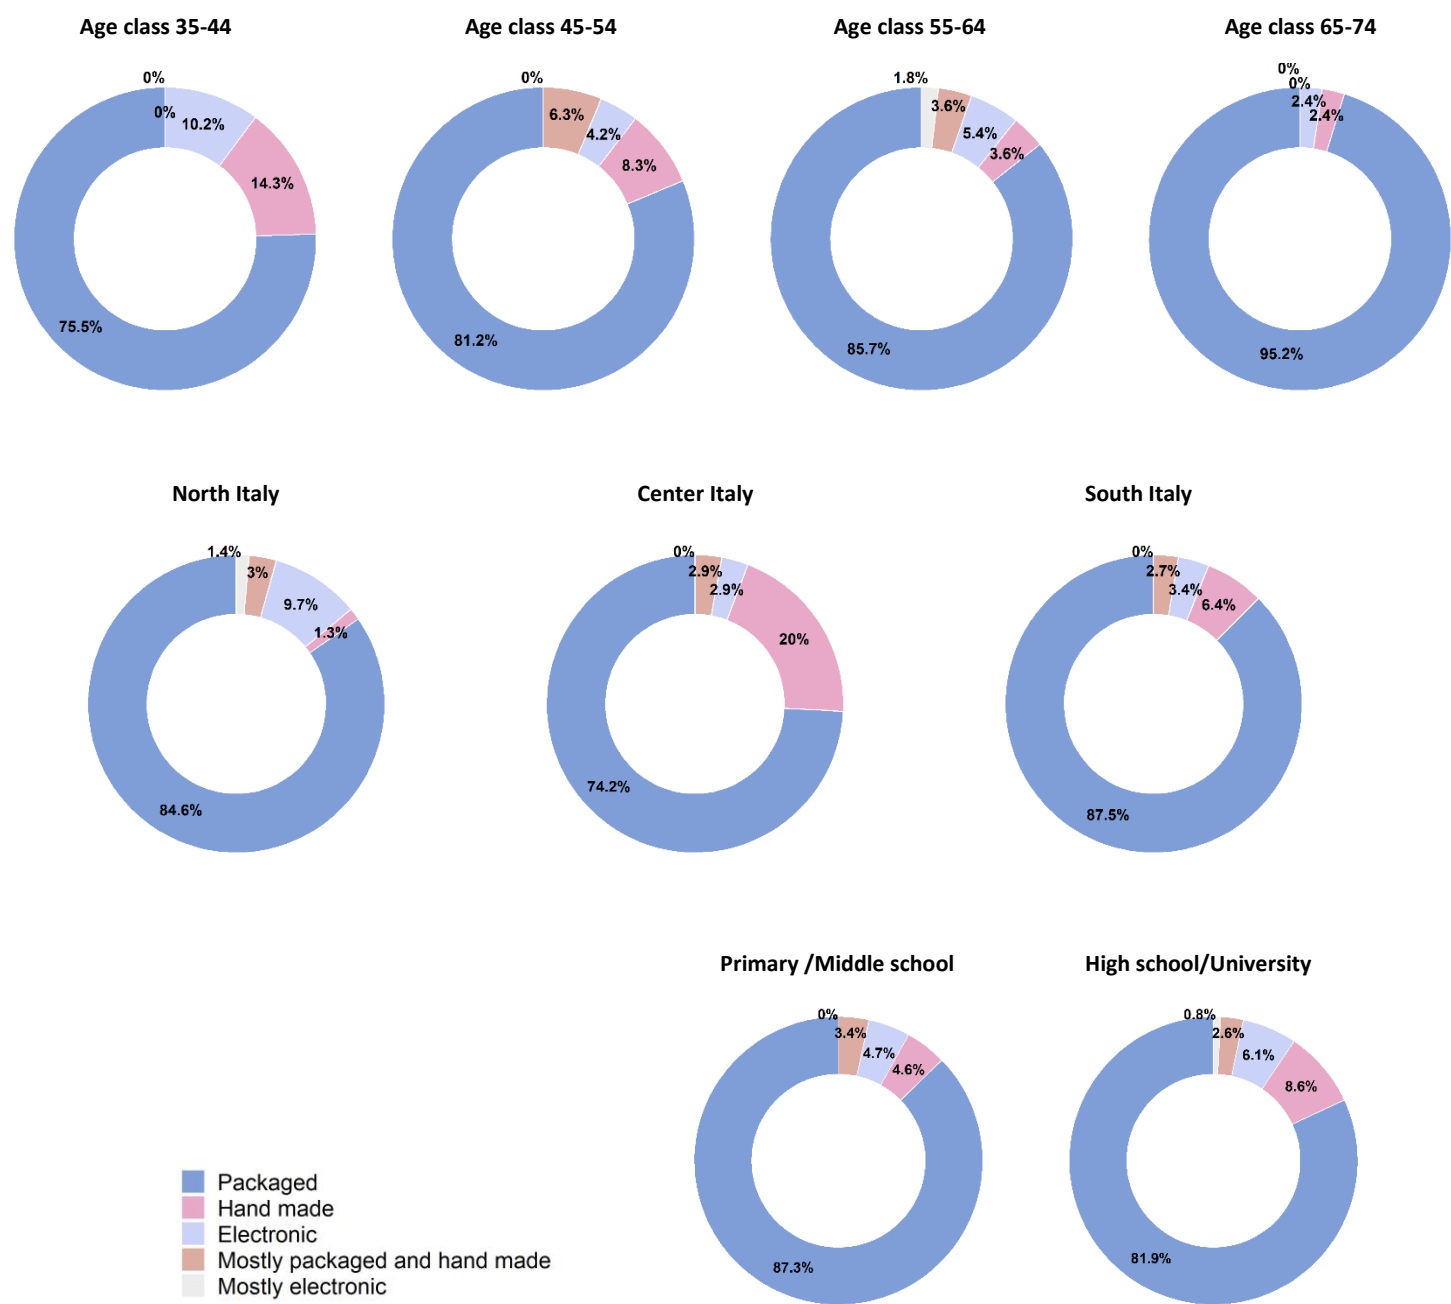

Pool of the following Italian regions: Piedmont, Lombardy, Liguria, Emilia Romagna, Tuscany, Lazio, Abruzzo, Basilicata, Calabria, and Sicily. Prevalence was age standardized by Italian National Institute of Statistics-ISTAT Italian population 2019 (except when it is reported by age-classes).

**Figure S.3. Age-standardized (Italian population) physical activity during leisure time by age classes, geographical area and educational level. Men residing in Italy aged 35-74 years, Health Examination Survey 2018-2019 - CUORE Project.**

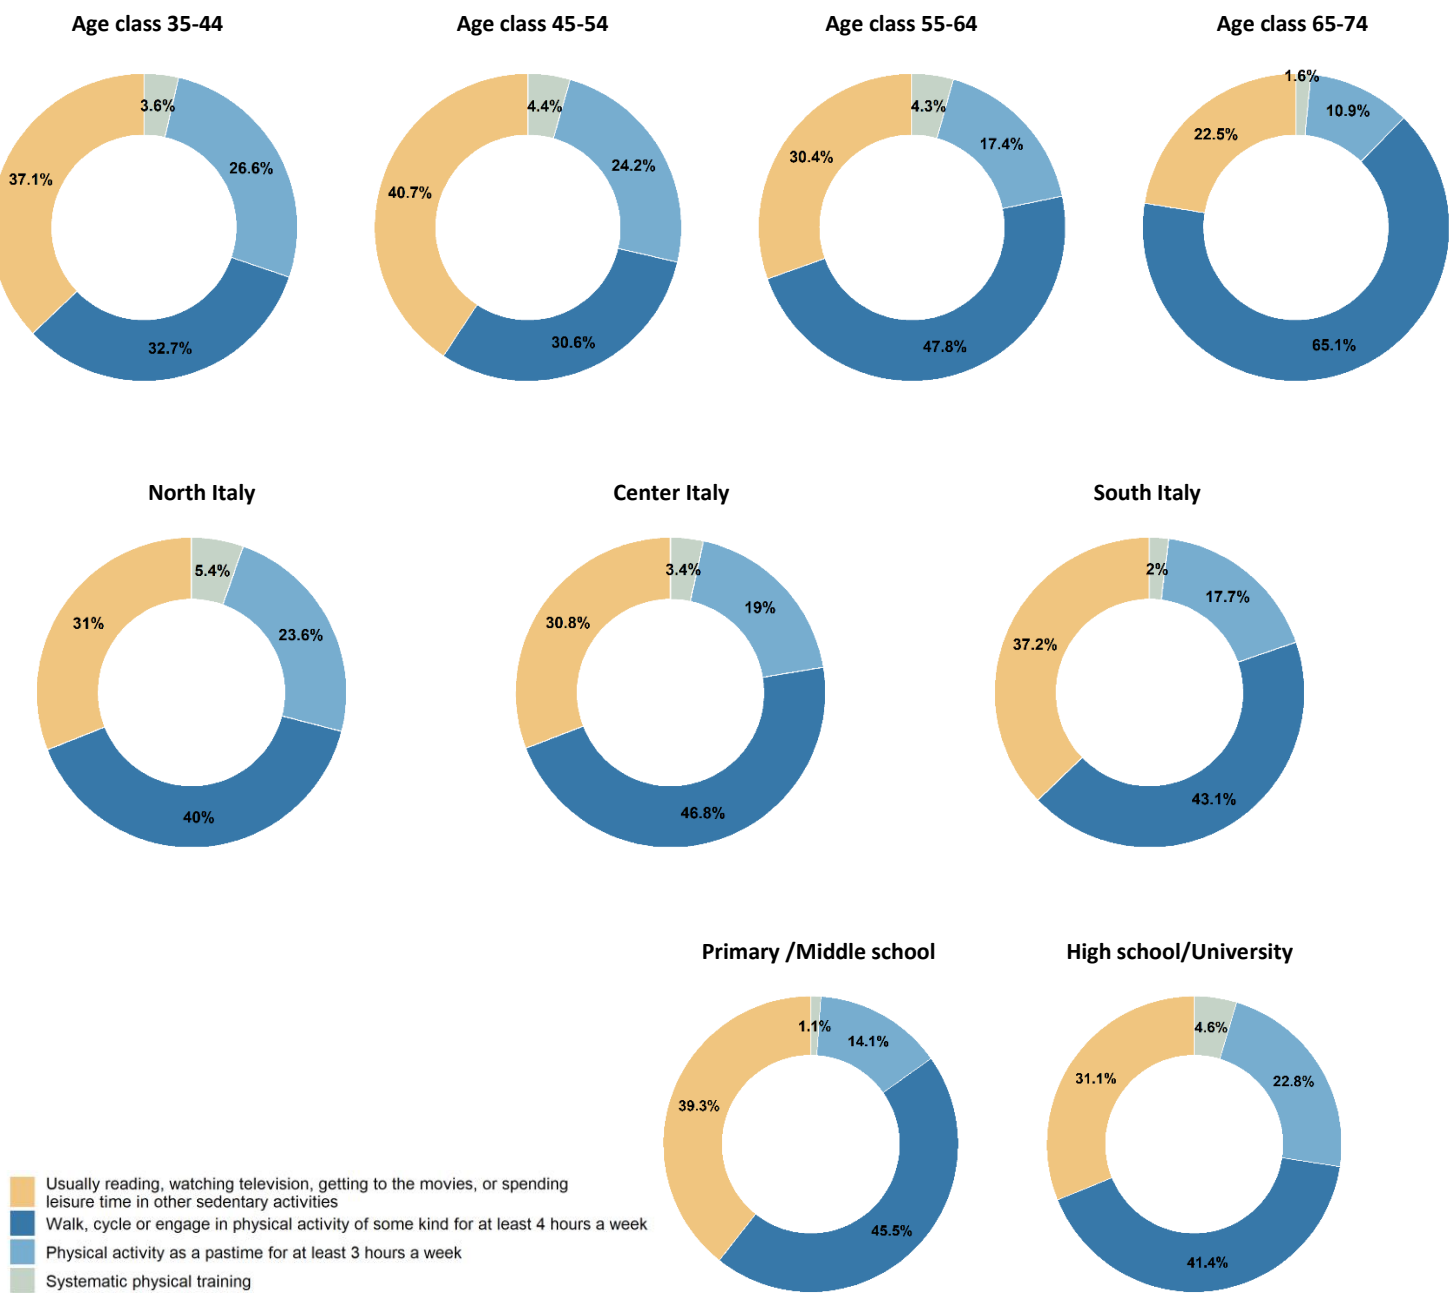

Pool of the following Italian regions: Piedmont, Lombardy, Liguria, Emilia Romagna, Tuscany, Lazio, Abruzzo, Basilicata, Calabria, and Sicily. Prevalence was age standardized by Italian National Institute of Statistics-ISTAT Italian population 2019 (except when it is reported by age-classes).

**Figure S.4. Age-standardized (Italian population) physical activity during leisure time by age classes, geographical area and educational level. Women residing in Italy aged 35-74 years, Health Examination Survey 2018-2019 - CUORE Project.**

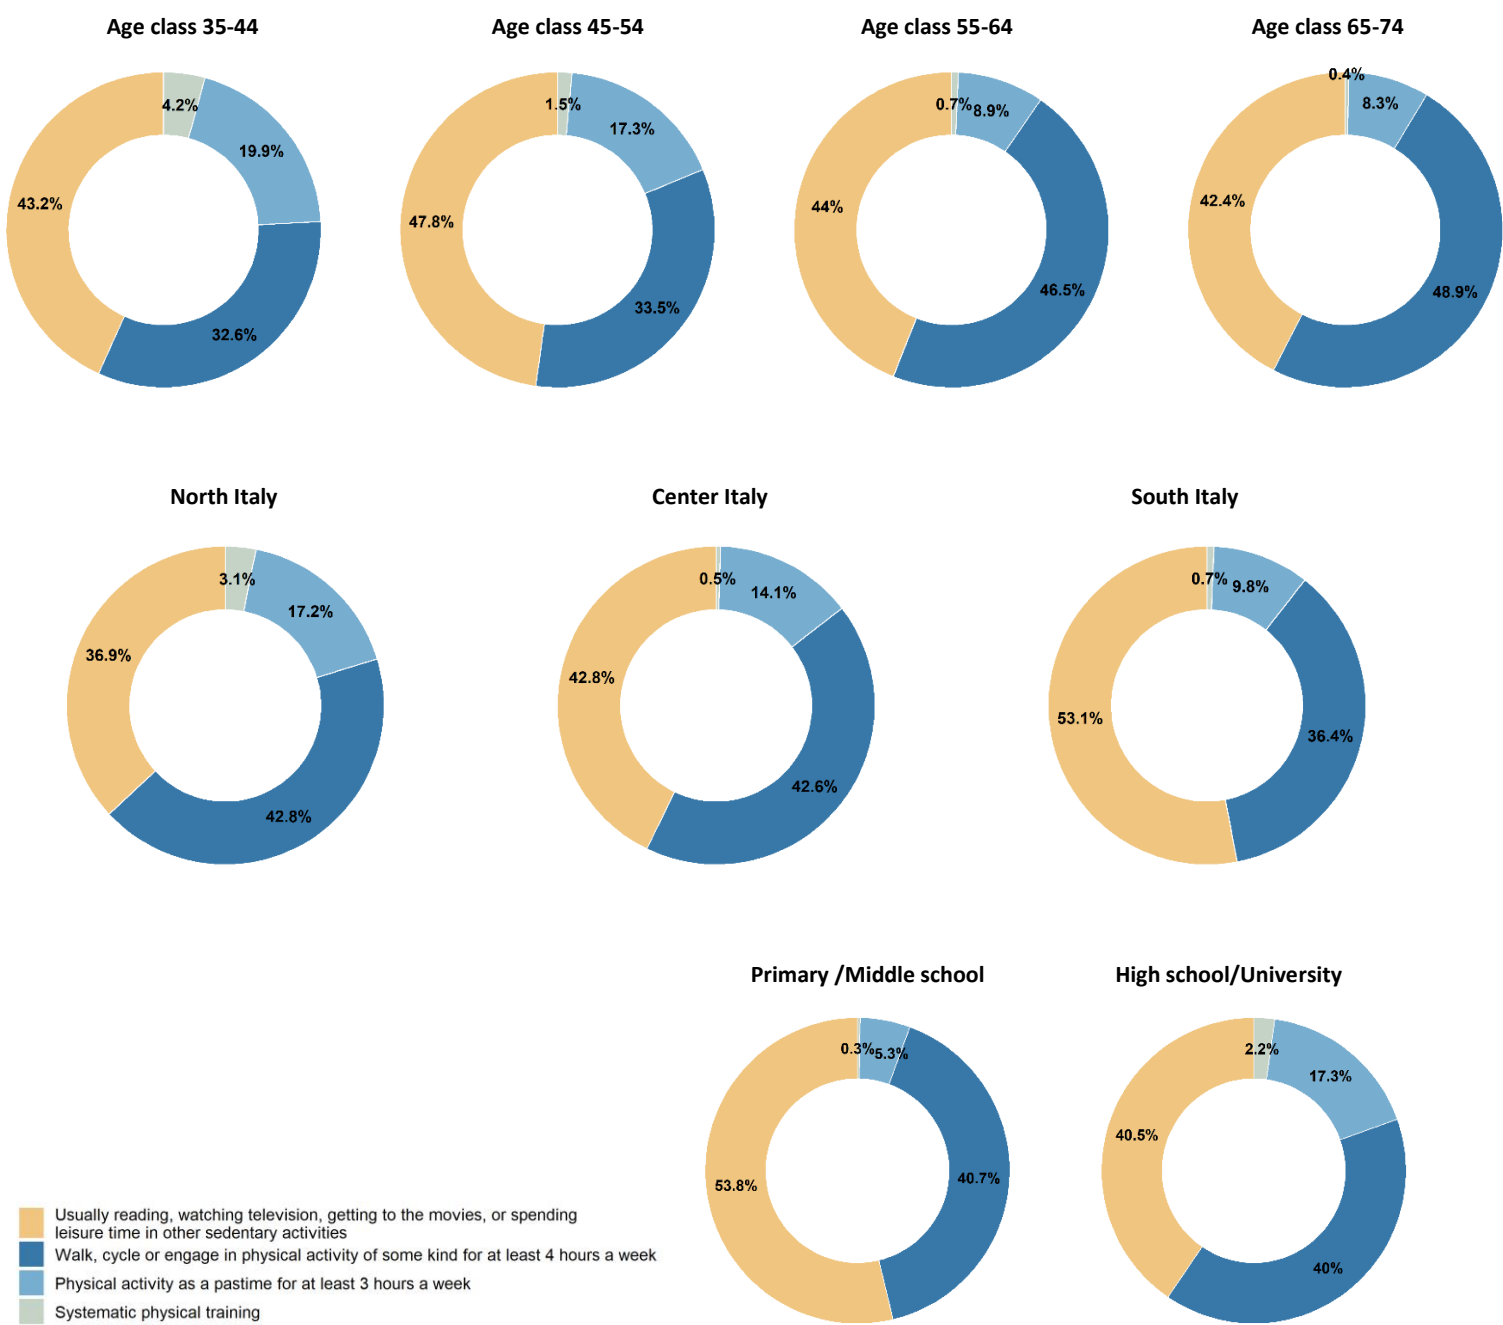

Pool of the following Italian regions: Piedmont, Lombardy, Liguria, Emilia Romagna, Tuscany, Lazio, Abruzzo, Basilicata, Calabria, and Sicily. Prevalence was age standardized by Italian National Institute of Statistics-ISTAT Italian population 2019 (except when it is reported by age-classes).

**Figure S.5. Age-standardized (Italian population) physical activity at work by age classes, geographical area and educational level. Men residing in Italy aged 35-74 years, Health Examination Survey 2018-2019 - CUORE Project.**

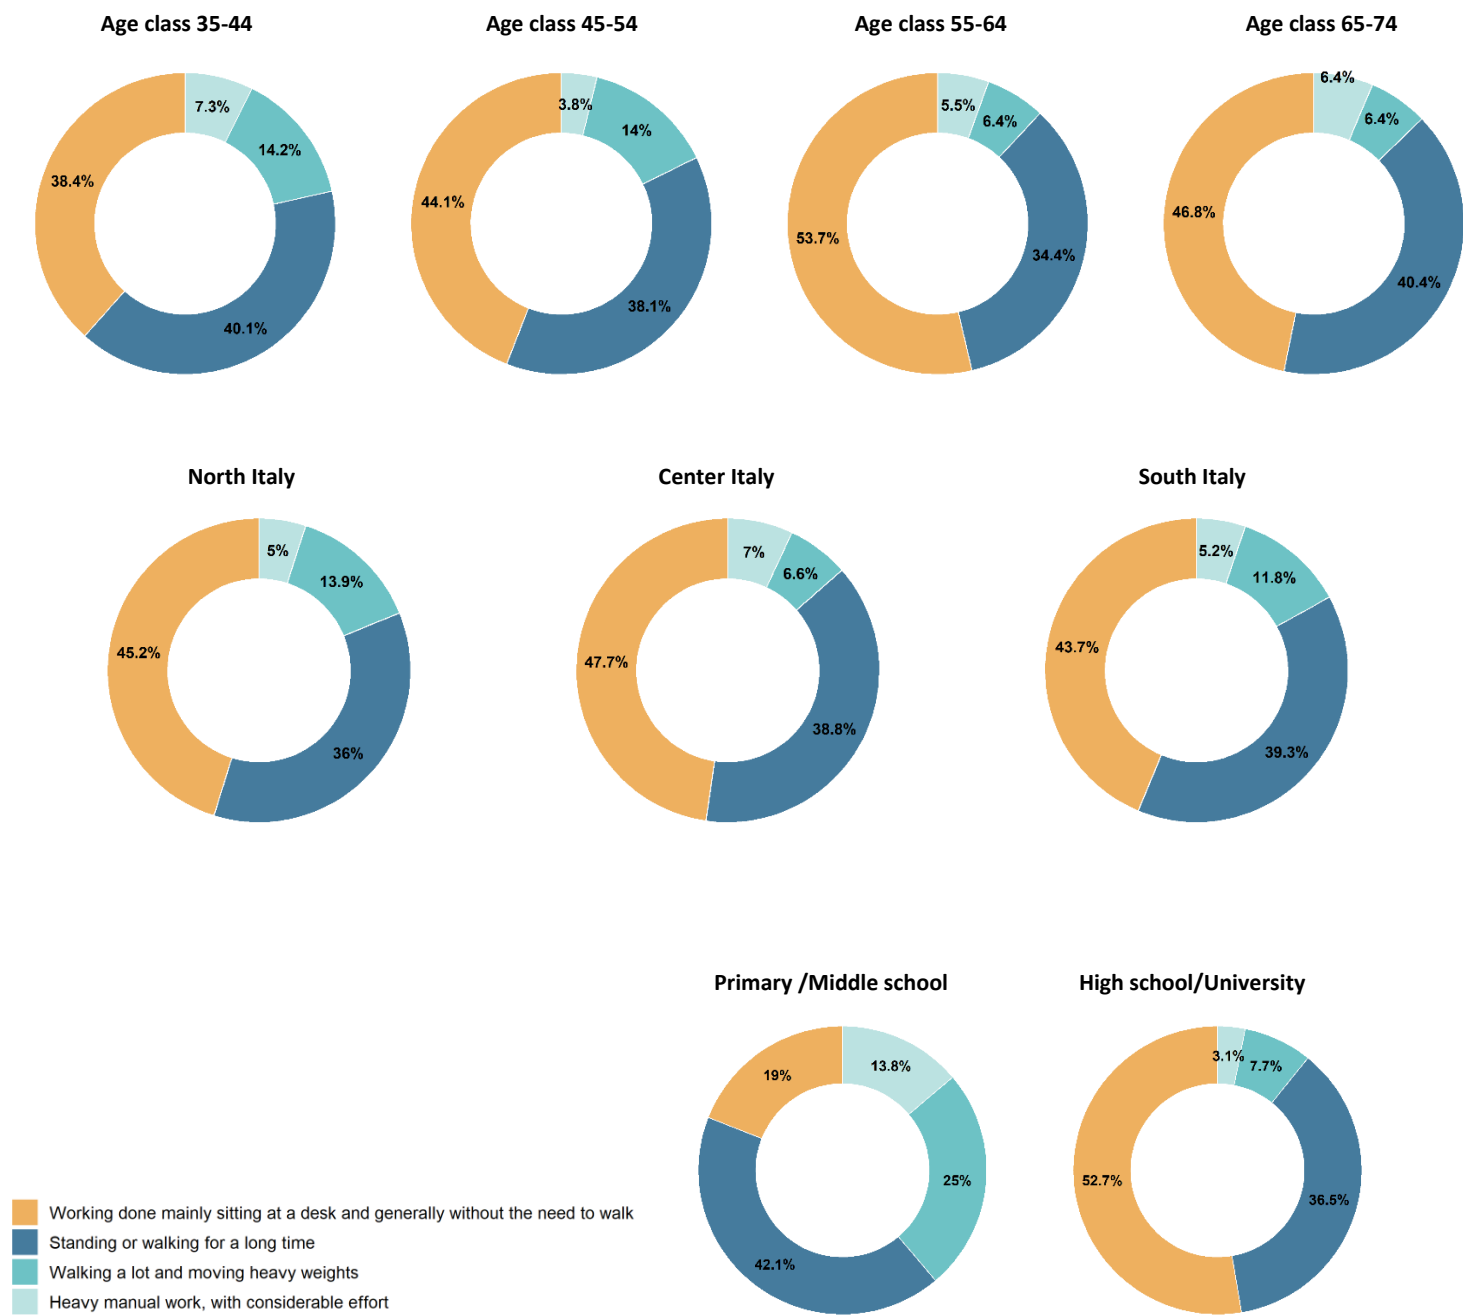

Pool of the following Italian regions: Piedmont, Lombardy, Liguria, Emilia Romagna, Tuscany, Lazio, Abruzzo, Basilicata, Calabria, and Sicily.  
Prevalence was age standardized by Italian National Institute of Statistics-ISTAT Italian population 2019 (except when it is reported by age-classes).

**Figure S.6. Age-standardized (Italian population) physical activity at work by age classes, geographical area and educational level. Women residing in Italy aged 35-74 years, Health Examination Survey 2018-2019 - CUORE Project.**

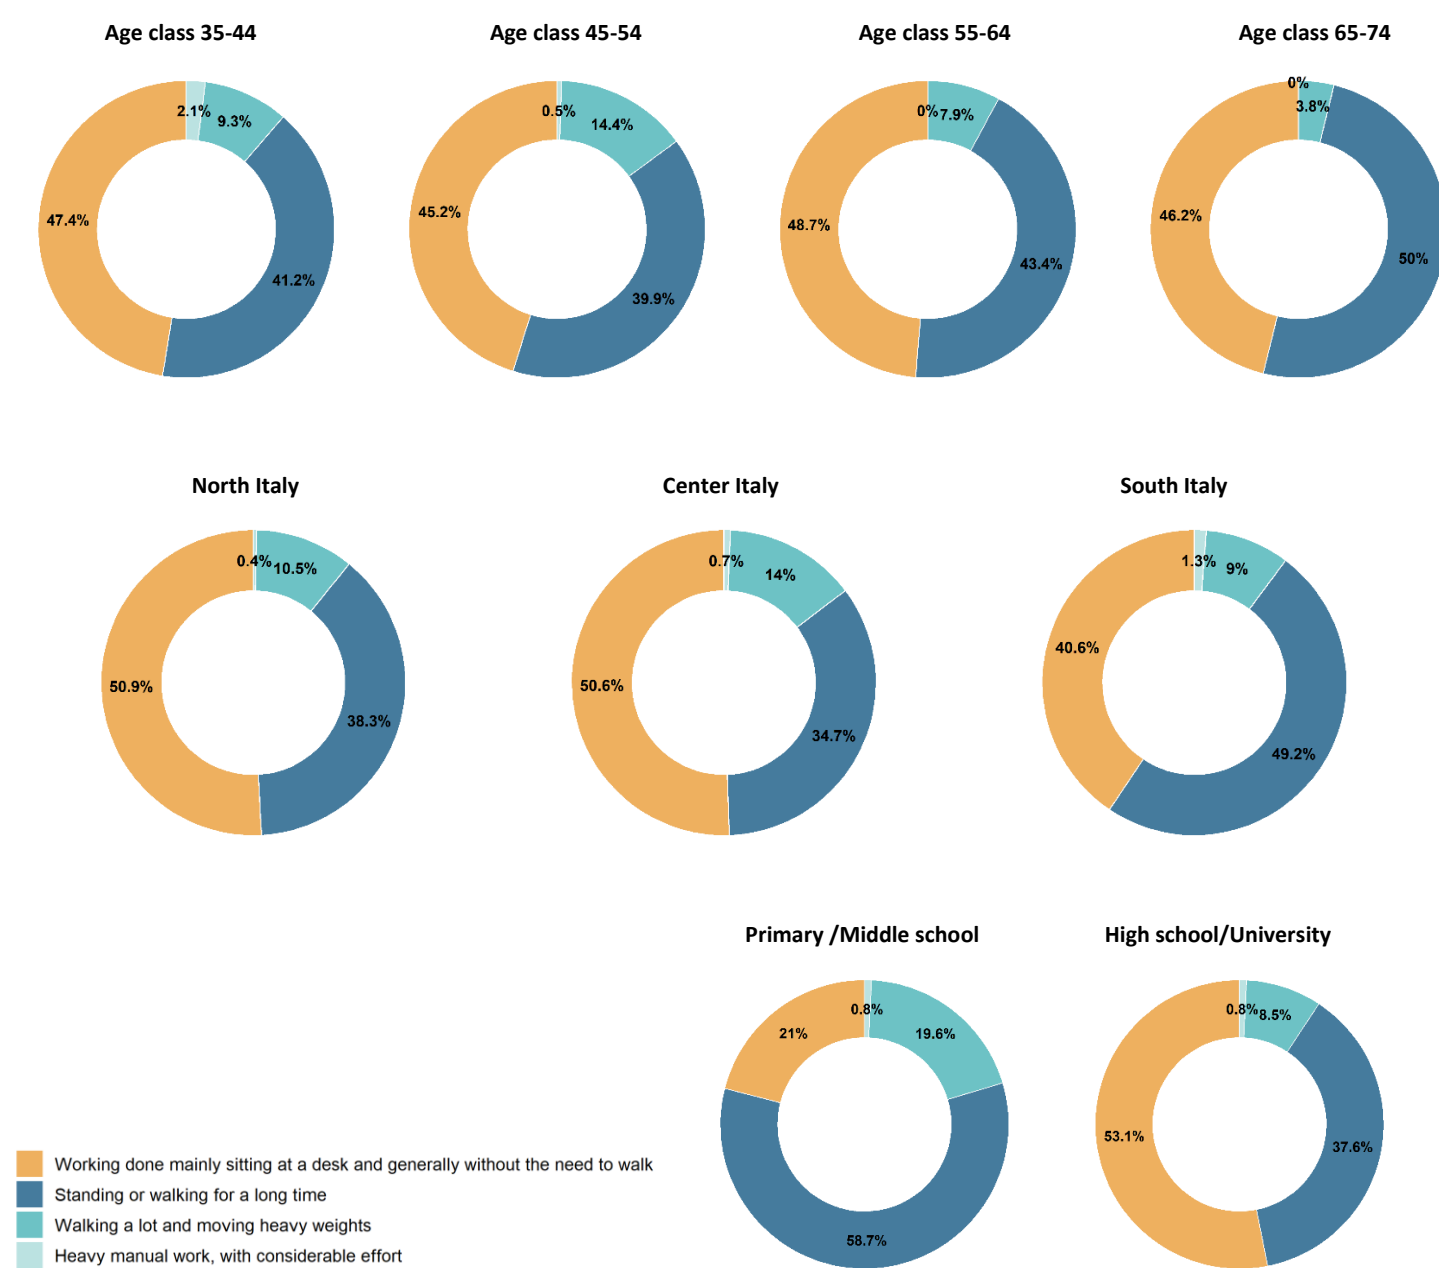

Pool of the following Italian regions: Piedmont, Lombardy, Liguria, Emilia Romagna, Tuscany, Lazio, Abruzzo, Basilicata, Calabria, and Sicily. Prevalence was age standardized by Italian National Institute of Statistics-ISTAT Italian population 2019 (except when it is reported by age-classes).
